# Supplementary material
Source: PubMed Central journal article supplement (PMC6422764)
Supplement: NIHMS1007383-supplement-SUP.pdf [file NIHMS1007383-supplement-SUP.pdf]

## **Supplementary Material 1: Sample Search Strategy**

In PubMed:

Line 1: aphasia Line 2: AND treatment OR therapy OR intervention OR rehabilitation OR outcome OR training Line 3: AND adult  
Line 4: NOT primary progressive aphasia OR dementia OR dysphagia OR transcranial magnetic stimulation OR transcranial direct  
current stimulation Line 5: NOT pharmaceutical preparations.

Article type was limited to Case Reports, Clinical Study, Clinical Trial, Clinical Trial, Phase I, Clinical Trial, Phase II, Clinical Trial,  
Phase III/CLASS IV, Clinical Trial, Phase IV, Comparative Study, Controlled Clinical Trial, Dataset, Meta-Analysis, Multicenter  
Study, Observational Study, Practice Guideline, Randomized Controlled Trial, Systematic Reviews, Validation Studies and Evaluation  
Studies. No other limits or filters were applied.

**Supplementary Material 2: Frequency of outcome measure use**

| Outcome  | Type    | <i>n</i> |
|----------|---------|----------|
| WAB-AQ   | Study   | 80       |
|          | Subject | 1276     |
| BNT      | Study   | 53       |
|          | Subject | 673      |
| CETI     | Study   | 27       |
|          | Subject | 458      |
| CADL-2   | Study   | 11       |
|          | Subject | 89       |
| Scenario | Study   | 1        |
| Test     | Subject | 34       |
| ACOM     | Study   | 1        |
|          | Subject | 73       |
| SAQOL    | Study   | 2        |
|          | Subject | 34       |

|           |         |    |
|-----------|---------|----|
| SAQOL-39  | Study   | 6  |
|           | Subject | 87 |
| SAQOL-39g | Study   | 1  |
|           | Subject | 20 |
| ALA       | Study   | 2  |
|           | Subject | 23 |
| GHQ-12    | Study   | 2  |
|           | Subject | 14 |

*Note:* Indicates the outcome measure, the number of studies reporting the measure and the cumulative number of subjects reported for the measure. CADL-2= Communication Activities of Daily Living-Second Edition; ACOM= Aphasia Communication Outcome Measure; SAQOL= Stroke and Aphasia Quality of Life Scale; ALA= Assessment For Living With Aphasia; GHQ-12= 12-item General Health Questionnaire

### Supplementary Material 3. Quality indicators for assessing included studies

| Indicator                                                                           | Description                                                                              |
|-------------------------------------------------------------------------------------|------------------------------------------------------------------------------------------|
| 1. Study protocol                                                                   | Adequate detail about the study protocol was given for the study to be replicated.       |
| 2. Blinding                                                                         | Participants were blinded to condition. Assessors were blinded to condition/treatment.   |
| 3. Sampling/allocation                                                              | For example: random sample, convenience sample, not described, etc.                      |
| 4. Treatment fidelity                                                               | Administrators established that the treatment protocol was delivered as planned.         |
| 5. Significance for primary outcome measure of interest (e.g., trained verbs)       | Statistical analyses were conducted and p-values were reported.                          |
| 6. Significance for standardized outcome measure of interest (i.e., WAB, CETI, BNT) | Statistical analyses were conducted and p-values were reported.                          |
| 7. Precision                                                                        | Effect size was reported or calculable.                                                  |
| 8. Intention to treat                                                               | Data was analyzed based on the group to which the participants were originally assigned. |

*Note:* Indicators: 1, 2, and 4-8 were scored as either (+) for present, or (-) for absent. Indicator 3 consisted of qualitative information. (+) values were tallied to create quality indicator summative scores. This table was adapted from Table S3. 1 in Faroqi-Shah, Y, Frymark, T, Mullen, R, & Wang, B. Effect of treatment for bilingual individuals with aphasia: A systematic review of the evidence. *Journal of Neurolinguistics*. 2010;23(4):319-341.

## Supplementary Material 4: Demographic information for within group studies using the Western Aphasia Battery – Aphasia Quotient

Note: M=Male; F = Female; TCM = transcortical motor; TSM = transcortical sensory; sev. = severe; I = Impairment-based treatment; A/P = activity/participation-based treatment; INT = integrated treatment; st. = standardized; CS = convenience sample

| Study Name                           | Study N; N for outcome measure; Sex | Mean Age(SD) range    | Aphasia Type                                                                                                          | Aphasia Severity (WAB-AQ)                            | Mean MPO range   | Treatment(Tx)                                                                                                                                                                                                                                                                                                                                                  | Pre-Tx M(SD)<br>Post-Tx M(SD)<br>Change Score | Methodological Rigor                                                                                                                                                                                                                                               |
|--------------------------------------|-------------------------------------|-----------------------|-----------------------------------------------------------------------------------------------------------------------|------------------------------------------------------|------------------|----------------------------------------------------------------------------------------------------------------------------------------------------------------------------------------------------------------------------------------------------------------------------------------------------------------------------------------------------------------|-----------------------------------------------|--------------------------------------------------------------------------------------------------------------------------------------------------------------------------------------------------------------------------------------------------------------------|
| Aftonomos, Appelbaum, & Steele, 1999 | 60; 60;<br>M = 35;<br>F = 25        | 68.60(12.30)<br>24-86 | Broca's = 21<br>Anomic = 13<br>Global = 11<br>Wernicke's = 8<br>Conduction = 3<br>TCM = 2<br>TSM = 1<br>Isolation = 1 | Mod.-to-sev.                                         | 24.60<br>.24-144 | <b>Type:</b> INT <b>Description:</b> Individual treatment using the Lingraphica (icon-based language system) to provide therapeutic exercises at the appropriate level for participants' severity. Also, focused on improving functional communication outside of the clinic as well as provided home exercises. <b>Intensity:</b> 2x/week, 60 min, 20.5 weeks | 42.50(27.40)<br>51.60(28.70)<br>9.10          | Level of Evidence:<br>IIB/class III<br>Study protocol: +<br>Blinding: -<br>Sampling/allocation: C<br>Treatment fidelity: -<br>Significance of primary outcome measure: +<br>Significance for st. outcome of interest: +<br>Precision: +<br>Intention to treat: N/A |
| Archibald, Orange, & Jamieson, 2009  | 8; 8;<br>M = 6;<br>F = 2            | 71.00(11.15)<br>55-87 | Anomic = 4<br>Broca's = 2<br>Conduction = 1<br>Global = 1                                                             | Mild = 3<br>Mild-to-Mod. = 2<br>Mod. = 1<br>Sev. = 2 | 48.38<br>7-150   | <b>Type:</b> I <b>Description:</b> Computer-provided treatment via AphasiaMate across 8 modules (i.e., auditory comprehension, visual matching, reading comprehension, spelling, semantics, sentence processing). Patients used computer at home or in clinic with trained personnel. <b>Intensity:</b> 1x/week, 60 min, 15 weeks                              | 60.29(33.37)<br>66.64(27.50)<br>6.35          | Level of Evidence:<br>IIB/class III<br>Study protocol: +<br>Blinding: -<br>Sampling/allocation: C<br>Treatment fidelity: -<br>Significance of primary outcome measure: +<br>Significance for st. outcome of interest: +<br>Precision: +<br>Intention to treat: N/A |

|                                                |                              |                       |                                                                                           |                              |                |                                                                                                                                                                                                                                                                                                                                                                                                                                                                                                          |                                       |                                                                                                                                                                                                                                                                           |
|------------------------------------------------|------------------------------|-----------------------|-------------------------------------------------------------------------------------------|------------------------------|----------------|----------------------------------------------------------------------------------------------------------------------------------------------------------------------------------------------------------------------------------------------------------------------------------------------------------------------------------------------------------------------------------------------------------------------------------------------------------------------------------------------------------|---------------------------------------|---------------------------------------------------------------------------------------------------------------------------------------------------------------------------------------------------------------------------------------------------------------------------|
| Babbitt, Worrall, & Cherney, 2015              | 74; 74;<br>M = 52;<br>F = 22 | 54.10(16.30)<br>18-86 | Nonfluent = 49<br>Fluent = 25                                                             | Mod.                         | 15.5<br>3-87   | <b>Type:</b> INT <b>Description:</b> Intensive Comprehensive Aphasia Program (ICAP): two individual therapy sessions and one session each of constraint-induced language therapy (CILT), reading/writing, computers and conversation group for six hours of daily programming. <b>Intensity:</b> 5x/week, 360 min, 4 weeks                                                                                                                                                                               | 51.30(21.80)<br>58.60(21.30)<br>7.30  | Level of Evidence: IIB/<br>class III<br>Study protocol: +<br>Blinding: -<br>Sampling/allocation: C<br>Treatment fidelity: +<br>Significance of primary<br>outcome measure: +<br>Significance for st.<br>outcome of interest: +<br>Precision: +<br>Intention to treat: N/A |
| Bakheit, Carrington, Griffiths, & Searle, 2005 | 67; 67;<br>M = 31;<br>F = 36 | 71.90(N/A)<br>38-92   | Broca's = 21<br>Anomic = 18<br>Global = 15<br>Wernicke's = 9<br>Conduction = 3<br>TCM = 1 | Mod.-to-sev.                 | 12.72<br>n/a   | <b>Type:</b> n/a <b>Description:</b> Individual "conventional" SLP sessions targeting comprehension and expression to improve functional communication. Tasks included selecting pictures/objects, naming objects, describing/recognizing associations between items, facilitating the expression of feelings and improving conversational ability. SLPs encouraged the use of gesture and other non-verbal communication including aids and equipment. <b>Intensity:</b> 2-5x/week, 40-60 min, 12 weeks | 44.30(28.10)<br>67.40(25.50)<br>23.10 | Level of Evidence: IIB/<br>class III<br>Study protocol: +<br>Blinding: +<br>Sampling/allocation: C<br>Treatment fidelity: -<br>Significance of primary<br>outcome measure: +<br>Significance for st.<br>outcome of interest: +<br>Precision: +<br>Intention to treat: N/A |
| Ball, de Riesthal, Breeding, & Mendoza, 2011   | 3; 3;<br>M = 1;<br>F = 2     | 70.67(3.21)<br>67-73  | Global = 2<br>Conduction = 1                                                              | Mod. = 1<br>Sev. = 2         | 28.33<br>26-33 | <b>Type:</b> I <b>Description:</b> Modified Anagram and Copy Treatment (ACT) and Copy and Recall Treatment (CART) (Beeson, Hirsch & Rewega, 2002 Beeson, Rising & Rolk, 2003) <b>Intensity:</b> 1x/week, 60 min, 12 weeks (daily home practice)                                                                                                                                                                                                                                                          | 23.80(20.35)<br>28.87(17.83)<br>5.07  | Level of Evidence: III/<br>class IV<br>Study protocol: +<br>Blinding: -<br>Sampling/allocation: C<br>Treatment fidelity: -<br>Significance of primary<br>outcome measure: -<br>Significance for st.<br>outcome of interest: -<br>Precision: +<br>Intention to treat: N/A  |
| Beeson, Rising, & Volk, 2003                   | 8; 8;<br>M = 5;<br>F = 3     | 71.00(5.98)<br>64-79  | Broca's = 7<br>Wernicke's = 1                                                             | Mod.-to-sev. = 1<br>Sev. = 7 | 39.75<br>24-84 | <b>Type:</b> I <b>Description:</b> Copy and Recall Treatment (CART): 1) Show a picture 2) Have PWA write the word and support them in writing the word, if needed 3) Remove the word and show picture again and have them write three more times again. Stimuli (i.e., 20 words) was developed with family support to make it functionally relevant. <b>Intensity:</b> 1x/week, 60 min, 17 to 30 weeks                                                                                                   | 20.59(5.31)<br>19.75(4.81)<br>-0.84   | Level of Evidence: III/<br>class IV<br>Study protocol: +<br>Blinding: -<br>Sampling/allocation: C<br>Treatment fidelity: -<br>Significance of primary<br>outcome measure: +<br>Significance for st.<br>outcome of interest: -                                             |

|                                                     |                            |                       |                               |                                                              |                  |                                                                                                                                                                                                                                                                                                                                                                                                                                                                                                                                                                                                                                                                                                                                                         |                                      |                                                                                                                                                                                                                                                                           |
|-----------------------------------------------------|----------------------------|-----------------------|-------------------------------|--------------------------------------------------------------|------------------|---------------------------------------------------------------------------------------------------------------------------------------------------------------------------------------------------------------------------------------------------------------------------------------------------------------------------------------------------------------------------------------------------------------------------------------------------------------------------------------------------------------------------------------------------------------------------------------------------------------------------------------------------------------------------------------------------------------------------------------------------------|--------------------------------------|---------------------------------------------------------------------------------------------------------------------------------------------------------------------------------------------------------------------------------------------------------------------------|
|                                                     |                            |                       |                               |                                                              |                  |                                                                                                                                                                                                                                                                                                                                                                                                                                                                                                                                                                                                                                                                                                                                                         |                                      | Precision: +<br>Intention to treat: N/A                                                                                                                                                                                                                                   |
| Boles, 1997                                         | 4; 4;<br>M = 1;<br>F = 3   | 56.00(15.38)<br>47-79 | N/A                           | Mild = 3<br>Mod. = 1                                         | 28.75<br>7-84    | <b>Type:</b> INT <b>Description:</b> Conversation partner therapy: Family member was coached by SLP to facilitate communication with PWA. <b>Intensity:</b> 2x/week, 60 min, 7 weeks                                                                                                                                                                                                                                                                                                                                                                                                                                                                                                                                                                    | 70.70(9.85)<br>74.10(8.62)<br>3.40   | Level of Evidence: III/<br>class IV<br>Study protocol: +<br>Blinding: -<br>Sampling/allocation: C<br>Treatment fidelity: -<br>Significance of primary<br>outcome measure: -<br>Significance for st.<br>outcome of interest: -<br>Precision: +<br>Intention to treat: N/A  |
| Breier, Maher,<br>Novak, &<br>Papanicolaou,<br>2006 | 6; 6;<br>M = 4;<br>F = 2   | 61.33(8.80)<br>53-77  | Broca's = 5<br>Conduction = 1 | Mild-to-Mod. = 2<br>Mod. = 2<br>Mod.-to-sev. = 1<br>Sev. = 1 | 46.83<br>21-70   | <b>Type:</b> A/P <b>Description:</b> Constraint Induced Language Therapy (CILT) = Only verbal expression was accepted and multi-modality communication was restricted, even self-cueing. Treatment was conducted in dyads and consisted of a dual card task with barrier present (i.e., PWA took turns requesting a card or responding another's request). Stimuli included four sets of cards of different semantic categories with two levels of difficulty (i.e., low- and high-frequency). Clinicians used shaping (i.e., increasing communicative demands of request/response from single words to lengthier sentences) and cueing for a successful production (i.e., semantic, phonemic, repetition). <b>Intensity:</b> 4x/week, 180 min, 3 weeks | 52.22(21.99)<br>54.45(24.65)<br>2.23 | Level of Evidence: IIB,<br>class III<br>Study protocol: +<br>Blinding: -<br>Sampling/allocation: C<br>Treatment fidelity: +<br>Significance of primary<br>outcome measure: +<br>Significance for st.<br>outcome of interest: -<br>Precision: +<br>Intention to treat: N/A |
| Brown &<br>Chobor, 1989                             | 10; 10;<br>M = 7;<br>F = 3 | 64.90(N/A)<br>55-76   | Nonfluent = 9<br>Fluent = 1   | Mild-to-Mod. = 1<br>Mod. = 2<br>Mod.-to-sev. = 3<br>Sev. = 5 | 77.99 36-<br>120 | <b>Type:</b> I <b>Description:</b> Writing treatment with right arm using a prosthesis which included four stages 1) geometric shapes 2) block letter alphabet 3) low- and high-frequency words and 4) two- and three-word short phrases. PWA went through three training phases: tracing, copying and writing to command within each of these stages. <b>Intensity:</b> 2x/week, 60 min, 12 weeks                                                                                                                                                                                                                                                                                                                                                      | 36.40(19.75)<br>44.80(23.00)<br>8.40 | Level of Evidence: IIB,<br>class III<br>Study protocol: +<br>Blinding: -<br>Sampling/allocation: C<br>Treatment fidelity: -<br>Significance of primary<br>outcome measure: -<br>Significance for st.<br>outcome of interest: -<br>Precision: +<br>Intention to treat: N/A |

|                                        |                             |                       |                                             |                              |                 |                                                                                                                                                                                                                                                                                                                                                                                                                                                                                                                                                                                                                                                                                                 |                                      |                                                                                                                                                                                                                                                                          |
|----------------------------------------|-----------------------------|-----------------------|---------------------------------------------|------------------------------|-----------------|-------------------------------------------------------------------------------------------------------------------------------------------------------------------------------------------------------------------------------------------------------------------------------------------------------------------------------------------------------------------------------------------------------------------------------------------------------------------------------------------------------------------------------------------------------------------------------------------------------------------------------------------------------------------------------------------------|--------------------------------------|--------------------------------------------------------------------------------------------------------------------------------------------------------------------------------------------------------------------------------------------------------------------------|
| Cherney, Halper, Holland, & Cole, 2008 | 3; 3;<br>M = 1;<br>F = 2    | 69.33(7.51)<br>65-78  | Broca's = 1<br>Wernicke's = 1<br>Anomic = 1 | Mild-to-Mod. = 1<br>Mod. = 2 | 28.33<br>18-48  | <b>Type:</b> A/P <b>Description:</b> AphasiaScripts software program was used for script training. 1) PWA listened to script while it is visible on the screen. 2) PWA reads the sentence twice chorally with avatar. PWA practice any words with which they had difficulty. 3)PWA reads each sentence aloud on their own. The computer records their response. 4) PWA can listen to the recorded sentence and then, practice and record again, if they want. PWA were trained sequentially on three scripts (i.e., three weeks each script). They practiced at home for 30 minutes daily. Clinician observed participants practicing once per week. <b>Intensity:</b> 5x/week, 30 min, 9 weeks | 62.13(11.41)<br>65.83(7.96)<br>3.70  | Level of Evidence: III/<br>class IV<br>Study protocol: +<br>Blinding: -<br>Sampling/allocation: C<br>Treatment fidelity: +<br>Significance of primary<br>outcome measure: -<br>Significance for st.<br>outcome of interest: -<br>Precision: +<br>Intention to treat: N/A |
| Cherney & Halper, 2008                 | 3; 3;<br>M = 2;<br>F = 1    | 64.00(12.77)<br>50-75 | Nonfluent = 2<br>Fluent = 1                 | Mild-to-Mod. = 1<br>Mod. = 2 | 36<br>12-48     | <b>Type:</b> I <b>Description:</b> AphasiaScripts software program was used for script training. 1) PWA listened to script while it is visible on the screen. 2) PWA reads the sentence twice chorally with avatar. PWA practice any words with which they had difficulty. 3)PWA reads each sentence aloud on their own. The computer records their response. 4) PWA can listen to the recorded sentence and then, practice and record again, if they want. PWA were trained sequentially on three scripts (i.e., three weeks each script). They practiced at home for 30 minutes daily. Clinician observed participants practicing once per week. <b>Intensity:</b> 5x/week, 30 min, 8 weeks   | 61.43(16.95)<br>63.53(13.51)<br>2.10 | Level of Evidence: III/<br>class IV<br>Study protocol: +<br>Blinding: -<br>Sampling/allocation: C<br>Treatment fidelity: +<br>Significance of primary<br>outcome measure: -<br>Significance for st.<br>outcome of interest: -<br>Precision: +<br>Intention to treat: N/A |
| Cherney, 2010                          | 25; 25;<br>M = 16;<br>F = 9 | 55.38(9.49)<br>35-82  | Nonfluent                                   | Mod.                         | 52.47<br>12-253 | <b>Type:</b> I <b>Description:</b> Oral Reading for Language in Aphasia (ORLA): 1) PWA listened to the sentence twice while reading it on a card or on the computer and pointing to each word in the sentence 2) PWA read the sentence aloud with the SLP twice 3) PWA identified two or three words randomly and read them aloud 4) PWA and SLP read the whole sentence again together. Thirty different stimulus items of a certain length (i.e., 3-5 words, 8-12 words and 15-30 words) according to their severity level were practiced within the session. <b>Intensity:</b> 2-3x/week, 60 min, 8-12 weeks                                                                                 | 54.59(29.68)<br>56.98(29.37)<br>2.38 | Level of Evidence:<br>IIB/class III<br>Study protocol: +<br>Blinding: -<br>Sampling/allocation: C<br>Treatment fidelity: -<br>Significance of primary<br>outcome measure: +<br>Significance for st.<br>outcome of interest: +<br>Precision: +<br>Intention to treat: N/A |



|                                     |                             |                       |                                                                                     |                              |                  |                                                                                                                                                                                                                                                                                                                                                                             |                                       |                                                                                                                                                                                                                                                                          |
|-------------------------------------|-----------------------------|-----------------------|-------------------------------------------------------------------------------------|------------------------------|------------------|-----------------------------------------------------------------------------------------------------------------------------------------------------------------------------------------------------------------------------------------------------------------------------------------------------------------------------------------------------------------------------|---------------------------------------|--------------------------------------------------------------------------------------------------------------------------------------------------------------------------------------------------------------------------------------------------------------------------|
| Doyle, Goldstein, & Bourgeois, 1987 | 4; 4;<br>M = 3;<br>F = 1    | 55.75(9.32)<br>42-62  | Broca's = 4                                                                         | Mild-to-Mod. = 2<br>Mod. = 2 | 117.5<br>30-177  | <b>Type: I Description:</b> Treatment incorporated Helm Elicited Language Program for Syntax Stimulation (HELPS), which included sentence production training with Level A prompting (i.e., delayed repetition) and Level B prompting (i.e., verbal stimulus requiring response to a question). <b>Intensity:</b> 3x/week, 6 months max                                     | 65.68(4.93)<br>69.28(4.20)<br>3.60    | Level of Evidence: III/<br>class IV<br>Study protocol: +<br>Blinding: -<br>Sampling/allocation: C<br>Treatment fidelity: -<br>Significance of primary<br>outcome measure: -<br>Significance for st.<br>outcome of interest: -<br>Precision: +<br>Intention to treat: N/A |
| Duncan, Schmah, & Small, 2016       | 19; 19;<br>M = 15;<br>F = 4 | 53.50(11.70)<br>31-72 | Broca's = 9<br>Anomic = 6<br>Conduction = 1<br>Wernicke's = 1<br>TSM = 1<br>TCM = 1 | Mild-to-Mod.                 | chronic<br>5-130 | <b>Type: I Description:</b> Imitation-based therapy wherein PWA listened to words and phrases produced by six different speakers and then, repeated them once or numerous times. Half of the PWA were also exposed to a video of the speaker. <b>Intensity:</b> 6x/week, 90 min, 6 weeks                                                                                    | 67.72(20.00)<br>70.34(18.33)<br>2.62  | Level of Evidence: III/<br>class IV<br>Study protocol: +<br>Blinding: +<br>Sampling/allocation: C<br>Treatment fidelity: +<br>Significance of primary<br>outcome measure: +<br>Significance for st.<br>outcome of interest: +<br>Precision: +<br>Intention to treat: N/A |
| Edmonds & Kiran, 2006               | 3;3;<br>M = 1;<br>F = 2     | 54.00(1.73)<br>53-56  | Nonfluent = 3                                                                       | Mod. =2<br>Sev. = 1          | 8.67<br>8-9      | <b>Type: I Description:</b> Semantic feature analysis-based (SFA-based) treatment (Boyle & Coehlo, 1995 Kiran & Thompson, 2003) involving the following steps: 1) initial naming attempt 2) written feature verification 3) yes/no feature questions 4) second naming attempt. Treatment was administered in both languages. <b>Intensity:</b> 2x/week, 120 min, 7-34 weeks | 48.33(24.66)<br>58.33(16.07)<br>10.00 | Level of Evidence: III/<br>class IV<br>Study protocol: +<br>Blinding: -<br>Sampling/allocation: C<br>Treatment fidelity: +<br>Significance of primary<br>outcome measure: +<br>Significance for st.<br>outcome of interest: +<br>Precision: +<br>Intention to treat: N/A |

|                                 |                           |                       |                                                           |                                                  |                 |                                                                                                                                                                                                                                                                                                                                                                                                                                                                                                                                                                        |                                      |                                                                                                                                                                                                                                                                          |
|---------------------------------|---------------------------|-----------------------|-----------------------------------------------------------|--------------------------------------------------|-----------------|------------------------------------------------------------------------------------------------------------------------------------------------------------------------------------------------------------------------------------------------------------------------------------------------------------------------------------------------------------------------------------------------------------------------------------------------------------------------------------------------------------------------------------------------------------------------|--------------------------------------|--------------------------------------------------------------------------------------------------------------------------------------------------------------------------------------------------------------------------------------------------------------------------|
| Edmonds, Mammino, & Ojeda, 2014 | 11;10;<br>M = 6;<br>F = 4 | 63.30(13.07)<br>35-81 | Anomic = 5<br>Conduction = 2<br>TCM = 2<br>Wernicke's = 1 | Mild = 1<br>Mild-to-Mod. = 8<br>Mod. = 1         | 57.5<br>14-144  | <b>Type: I Description:</b> Verb Network Strengthening Treatment (VNeST): PWA were given a verb then, asked to retrieve related agents and patients. They are encouraged and supported to generate multiple pairs of agents and patients for each verb. <b>Intensity:</b> 2x/week, 120min, 10 weeks                                                                                                                                                                                                                                                                    | 75.91(10.36)<br>82.08(8.54)<br>6.17  | Level of Evidence: III/<br>class IV<br>Study protocol: +<br>Blinding: -<br>Sampling/allocation: C<br>Treatment fidelity: +<br>Significance of primary<br>outcome measure: +<br>Significance for st.<br>outcome of interest: +<br>Precision: +<br>Intention to treat: N/A |
| Edmonds, Nadeau, & Kiran, 2009  | 4; 4;<br>M = 1;<br>F = 3  | 61.50(10.08)<br>52-75 | TMA = 2<br>Conduction = 2                                 | Mild-to-Mod. = 4                                 | 37.25<br>10-96  | <b>Type: I Description:</b> Verb Network Strengthening Treatment (VNeST): 1) PWA were given a verb. 2) Asked to produce 3-4 thematic role pairs. 3) Picked a thematic role pair and answered wh-questions about it <b>Intensity:</b> 2x/week, 120 min, avg. 4.75 weeks (4-6 weeks)                                                                                                                                                                                                                                                                                     | 74.83(3.41)<br>83.10(2.27)<br>8.28   | Level of Evidence: III/<br>class IV<br>Study protocol: +<br>Blinding: -<br>Sampling/allocation: C<br>Treatment fidelity: +<br>Significance of primary<br>outcome measure: -<br>Significance for st.<br>outcome of interest: -<br>Precision: +<br>Intention to treat: N/A |
| Falconer & Antonucci, 2012      | 4; 4;<br>M = 3;<br>F = 1  | 45.75(15.09)<br>31-62 | Conduction = 2<br>Broca's = 1<br>TCM = 1                  | Mild-to-Mod. = 1<br>Mod. = 2<br>Mod.-to-sev. = 1 | 86.99<br>24-156 | <b>Type: INT Description:</b> Modified Promoting Aphasics' Communication Effectiveness (PACE) approach: Within a small group, PWA took turns describing stimuli hidden from others with enough detail for others to guess the item) When word-retrieval difficulty occurred, the activity was briefly discontinued while PWA were led through the SFA chart (Boyle,2004) until they accessed the target. HW assignments included describing difficult-to-name pictured objects using SFA outside of treatment sessions. <b>Intensity:</b> 2x/week, 90-120 min, 7 weeks | 54.15(15.39)<br>57.00(16.22)<br>2.85 | Level of Evidence: III/<br>class IV<br>Study protocol: +<br>Blinding: -<br>Sampling/allocation: C<br>Treatment fidelity: -<br>Significance of primary<br>outcome measure: -<br>Significance for st.<br>outcome of interest: -<br>Precision: +<br>Intention to treat: N/A |

|                                                |                          |                       |                                          |                                          |                 |                                                                                                                                                                                                                                                                                                                                                                                                                                                                                                                                                                                                                                                                                                                                                                                                                                                                                                                                                                                                  |                                       |                                                                                                                                                                                                                                                                          |
|------------------------------------------------|--------------------------|-----------------------|------------------------------------------|------------------------------------------|-----------------|--------------------------------------------------------------------------------------------------------------------------------------------------------------------------------------------------------------------------------------------------------------------------------------------------------------------------------------------------------------------------------------------------------------------------------------------------------------------------------------------------------------------------------------------------------------------------------------------------------------------------------------------------------------------------------------------------------------------------------------------------------------------------------------------------------------------------------------------------------------------------------------------------------------------------------------------------------------------------------------------------|---------------------------------------|--------------------------------------------------------------------------------------------------------------------------------------------------------------------------------------------------------------------------------------------------------------------------|
| Faroqi-Shah, 2013                              | 6; 6;<br>M = 5;<br>F = 1 | 47.67(8.71)<br>37-56  | Broca's = 6                              | Mild-to-Mod. = 3<br>Mod. = 2<br>Sev. = 1 | 33.17<br>16-84  | <b>Type:</b> I Morphosemantic treatment: 1) name action in 3 pictures 2) grammaticality judgment 3) match spoken sentence to picture 4) PWA were given a sentence and asked to write the verb inflection to match the picture 5) PWA arranged words in the correct order to form the sentence matching the picture. Trained past, present and future tenses of 20 verbs. <b>Intensity:</b> 4x/week, 60-120 min, 3 weeks                                                                                                                                                                                                                                                                                                                                                                                                                                                                                                                                                                          | 59.97(22.20)<br>77.57(12.86)<br>17.60 | Level of Evidence: III/<br>class IV<br>Study protocol: +<br>Blinding: -<br>Sampling/allocation: C<br>Treatment fidelity: +<br>Significance of primary<br>outcome measure: +<br>Significance for st.<br>outcome of interest: +<br>Precision: +<br>Intention to treat: N/A |
| Faroqi-Shah, 2008                              | 4; 4;<br>M = 2;<br>F = 2 | 64.50(3.87)<br>59-68  | Broca's = 3<br>TCM = 1                   | Mild-to-Mod. = 1<br>Mod. = 3             | 56.99<br>12-108 | <b>Type:</b> I Morphophonological treatment: 1) Naming the action from a picture 2) Auditory discrimination 3) Lexical decision 4) Morphology generation 5) Oral and written transformation 6) Repetition AND Morphosemantic treatment 1) Naming the action 2) Anomaly judgment (i.e., identifying mismatch between adverb & verb tense) 3) Auditory Comprehension (i.e., matching sentence to picture) 4) Sentence completion (i.e., fill in the blank with correct verb form) 5) Sentence construction (i.e., arranging words in the correct order) <b>Intensity:</b> 4-5x/week, 60-120 min, 3 weeks                                                                                                                                                                                                                                                                                                                                                                                           | 64.65(2.83)<br>72.05(3.71)<br>7.40    | Level of Evidence: III/<br>class IV<br>Study protocol: +<br>Blinding: -<br>Sampling/allocation: C<br>Treatment fidelity: +<br>Significance of primary<br>outcome measure: +<br>Significance for st.<br>outcome of interest: -<br>Precision: +<br>Intention to treat: N/A |
| Ferguson, Evans, & Raymer, 2012                | 4; 4;<br>M = 2;<br>F = 2 | 57.75(14.20)          | Broca's = 2<br>Conduction = 1<br>TCM = 1 | Mild-to-Mod. = 2<br>Sev. = 2             | 34.75<br>22-41  | <b>Type:</b> I Intention Gesture Treatment (IGT): 1) Participants generated L-hand gesture and pressed button to view target noun then, attempted to name. 2) If they were inaccurate, the SLP modeled the gesture and noun together and participant imitated 4-6 times. 3) SLP modeled again and PWA rehearsed gesture and verbal production 4-6 times. 4) PWA re-attempted to produce the target noun after producing gesture and pressing the red button. <b>Pantomime Gesture treatment (PGT)</b> 1) PWA were trained to produce pantomime gestures. 2) SLP pushed button to change picture, then PWA attempted to name. 3) If they were inaccurate, SLP produced gesture and verbal model of target and PWA imitated 4-6x. 4) SLP modeled again and participant practiced the gesture and verbal target again. 5) They re-attempted production of the target after SLP pressed button. <b>Intensity:</b> 2-3x/week, 45-60 min, 3-5 weeks, 1 week break then 2-3x/week, 45-60 min, 3-5 weeks | 50.45(30.39)<br>55.70(30.84)<br>5.25  | Level of Evidence: III/<br>class IV<br>Study protocol: +<br>Blinding: -<br>Sampling/allocation: C<br>Treatment fidelity: -<br>Significance of primary<br>outcome measure: -<br>Significance for st.<br>outcome of interest: -<br>Precision: +<br>Intention to treat: N/A |
| R. K. Johnson, Hough, King, Vos, & Jeffs, 2008 | 3; 3;<br>M = 1;<br>F = 2 | 67.67(10.07)<br>57-77 | Broca's = 2<br>Mixed = 1                 | Mod. = 1<br>Mod.-to-sev. = 1<br>Sev. = 1 | 52.68 27-<br>93 | <b>Type:</b> INT <b>Description:</b> Intensive therapy using computer-based augmentative alternative communication (AAC) (i.e., symbol identification, navigation, scenario role play, sentences). It involved training caregiver in                                                                                                                                                                                                                                                                                                                                                                                                                                                                                                                                                                                                                                                                                                                                                             | 32.87(14.62)<br>33.40(6.48)<br>.53    | Level of Evidence: III/<br>class IV<br>Study protocol: +<br>Blinding: -                                                                                                                                                                                                  |

|                                                        |                            |                       |             |                                                              |                 |                                                                                                                                                                                                                                                                                                                                                                                                                                                                             |                                      |                                                                                                                                                                                                                                                                    |
|--------------------------------------------------------|----------------------------|-----------------------|-------------|--------------------------------------------------------------|-----------------|-----------------------------------------------------------------------------------------------------------------------------------------------------------------------------------------------------------------------------------------------------------------------------------------------------------------------------------------------------------------------------------------------------------------------------------------------------------------------------|--------------------------------------|--------------------------------------------------------------------------------------------------------------------------------------------------------------------------------------------------------------------------------------------------------------------|
|                                                        |                            |                       |             |                                                              |                 | therapy and use of an AAC device to reduce the severity of the impairment and increase activities and participation. <b>Intensity:</b> 3-4x/week, 60 min, 12 weeks                                                                                                                                                                                                                                                                                                          |                                      | Sampling/allocation: C<br>Treatment fidelity: -<br>Significance of primary outcome measure: -<br>Significance for st. outcome of interest: -<br>Precision: +<br>Intention to treat: N/A                                                                            |
| M. L. Johnson et al., 2014                             | 4; 4;<br>N/A               | 70.75(9.57)<br>60-83  | Broca's = 4 | Mild-to-Mod. = 2<br>Mod. = 2                                 | 46.79<br>16-96  | <b>Type:</b> A/P Constraint-induced aphasia therapy (CIAT) (i.e., discouragement of gesture and nonverbal vocalizations). Daily tasks included 1) Completion of How Well scale of the Verbal Activity Log (VAL) 2) Speech Repetition Drills 3) Activities of Daily Living (ADL) phrase repetition drills 4) Language Card game 5) Picture description 6) Role play 7) Home skill assignment. Caregiver present for all therapy. <b>Intensity:</b> 7x/week, 195 min, 2 weeks | 66.23(7.14)<br>79.28(11.29)<br>13.05 | Level of Evidence: III/<br>class IV<br>Study protocol: +<br>Blinding: -<br>Sampling/allocation: C<br>Treatment fidelity: -<br>Significance of primary outcome measure: +<br>Significance for st. outcome of interest: -<br>Precision: +<br>Intention to treat: N/A |
| Kendall et al., 2008                                   | 10; 10;<br>M = 6;<br>F = 4 | 52.40(11.40)<br>40-76 | NS          | Mild = 2<br>Mild-to-Mod. = 7<br>Mod. = 1                     | 59.7<br>16-120  | <b>Type: I Description:</b> Phonologically-based treatment: 1)Trains subjects on individual phonemes and 2) Trains phonological and orthographic sequence knowledge at the syllable level <b>Intensity:</b> 4x/week, 120 min, 12 weeks                                                                                                                                                                                                                                      | 77.12(14.47)<br>82.77(14.08)<br>5.65 | Level of Evidence: III/<br>class IV<br>Study protocol: +<br>Blinding: -<br>Sampling/allocation: C<br>Treatment fidelity: +<br>Significance of primary outcome measure: -<br>Significance for st. outcome of interest: +<br>Precision: +<br>Intention to treat: N/A |
| Kendall, Raymer, Rose, Gilbert, & Gonzalez Rothi, 2014 | 8; 8;<br>M = 4;<br>F = 4   | 62.00(9.65)<br>46-72  | N/A         | Mild = 3<br>Mild-to-Mod. = 3<br>Mod. = 1<br>Mod.-to-sev. = 1 | 63.13<br>11-120 | <b>Type: I Description:</b> Naming pictures with semantic, phonologic, repetition and orthographic cueing hierarchy including a delayed-recall step. <b>Intensity:</b> 3x/week, 60 min, 3.5 weeks                                                                                                                                                                                                                                                                           | 74.45(18.29)<br>79.35(20.03)<br>4.90 | Level of Evidence: III/<br>class IV<br>Study protocol: +<br>Blinding: +<br>Sampling/allocation: C<br>Treatment fidelity: -<br>Significance of primary outcome measure: -<br>Significance for st. outcome of interest: +<br>Precision: +<br>Intention to treat: N/A |

|                                            |                              |                       |                                      |                                                                                   |               |                                                                                                                                                                                                                                                                                                                                                                                                                                                           |                                        |                                                                                                                                                                                                                                                                          |
|--------------------------------------------|------------------------------|-----------------------|--------------------------------------|-----------------------------------------------------------------------------------|---------------|-----------------------------------------------------------------------------------------------------------------------------------------------------------------------------------------------------------------------------------------------------------------------------------------------------------------------------------------------------------------------------------------------------------------------------------------------------------|----------------------------------------|--------------------------------------------------------------------------------------------------------------------------------------------------------------------------------------------------------------------------------------------------------------------------|
| Kendall, Oelke, Brookshire, & Nadeau, 2015 | 26; 26;<br>M = 15;<br>F = 11 | 56.04(14.53)<br>26-78 | NS                                   | Above cut-off = 5<br>Mild = 6<br>Mild-to-Mod. = 9<br>Mod. = 5<br>Mod.-to-sev. = 1 | 47.5<br>8-211 | <b>Type: I Description:</b> Multimodal, phonologically-based therapy using phonemes in isolation and one-, two-, and three-syllable sequences in real words and nonword combinations. More specifically, Stage 1) targeted sounds in isolation and Stage 2) targeted sounds in syllables. Each stage involves an overview, introduction of sounds and sound sequences, perception tasks and production tasks. <b>Intensity:</b> 5x/week, 120 min, 6 weeks | 78.68(16.53)<br>82.65(12.58) -<br>0.08 | Level of Evidence: III/<br>class IV<br>Study protocol: +<br>Blinding: -<br>Sampling/allocation: C<br>Treatment fidelity: +<br>Significance of primary<br>outcome measure: +<br>Significance for st.<br>outcome of interest: +<br>Precision: +<br>Intention to treat: N/A |
| Kiran & Thompson, 2003                     | 4; 4;<br>M = 1;<br>F = 3     | 68.50(5.92)<br>63-75  | Fluent = 4                           | Mild-to-Mod. = 1<br>Mod. = 2<br>Mod.-to-sev. = 1                                  | 33.75<br>9-99 | <b>Type: I Description:</b> Typicality-based SFA treatment involving 1) Naming 2) Category Sorting 3) Feature Verification 4) Answering yes/no questions <b>Intensity:</b> 2x/week, 120 min, 17-35 weeks                                                                                                                                                                                                                                                  | 52.68(11.95)<br>60.90(12.81) -<br>8.23 | Level of Evidence: III/<br>class IV<br>Study protocol: +<br>Blinding: -<br>Sampling/allocation: C<br>Treatment fidelity: -<br>Significance of primary<br>outcome measure: -<br>Significance for st.<br>outcome of interest: -<br>Precision: +<br>Intention to treat: N/A |
| Kiran, 2005                                | 3; 3;<br>M = 3               | 63.67(4.16)<br>59-67  | TCM = 1<br>Broca's = 1<br>Anomic = 1 | Mild-to-Mod. = 2<br>Mod. = 1                                                      | 156<br>24-288 | <b>Type: I Description:</b> Phoneme-to-grapheme conversion: 1) writing to dictation of the word 2) copying the word 3) oral reading of the word 4) selecting and writing the sounds of the target 5) writing phonemes of the target word presented aloud 6) writing to dictation of the word <b>Intensity:</b> 2x/week, 120 min, 5-10 weeks                                                                                                               | 73.10(12.25)<br>70.97(14.33) -<br>2.13 | Level of Evidence: III/<br>class IV<br>Study protocol: +<br>Blinding: -<br>Sampling/allocation: C<br>Treatment fidelity: +<br>Significance of primary<br>outcome measure: +<br>Significance for st.<br>outcome of interest: -<br>Precision: +<br>Intention to treat: N/A |

|                                 |                          |                       |                              |                                                  |              |                                                                                                                                                                                                                                                                                                 |                                      |                                                                                                                                                                                                                                                                          |
|---------------------------------|--------------------------|-----------------------|------------------------------|--------------------------------------------------|--------------|-------------------------------------------------------------------------------------------------------------------------------------------------------------------------------------------------------------------------------------------------------------------------------------------------|--------------------------------------|--------------------------------------------------------------------------------------------------------------------------------------------------------------------------------------------------------------------------------------------------------------------------|
| Kiran & Johnson, 2008           | 3; 3;<br>M = 2;<br>F = 1 | 62.33(11.15)<br>54-75 | Anomic = 3                   | Mild = 1<br>Mild-to-Mod. = 2                     | 18<br>7-36   | <b>Type: I Description:</b> Typicality-based SFA treatment 1) Naming the picture 2) sorting pictures of target category 3) selecting written features for the target 4) answering written yes/no questions 5) naming the picture <b>Intensity:</b> 2x/week, 120 min, avg. 14 weeks (8-18 weeks) | 84.70(2.42)<br>88.70(0.36)<br>4.00   | Level of Evidence: III/<br>class IV<br>Study protocol: -<br>Blinding: -<br>Sampling/allocation: C<br>Treatment fidelity: +<br>Significance of primary<br>outcome measure: +<br>Significance for st.<br>outcome of interest: -<br>Precision: +<br>Intention to treat: N/A |
| Kiran, 2008                     | 5; 5;<br>M = 1;<br>F = 4 | 58.40(12.03)<br>47-77 | Conduction= 3<br>Broca's = 2 | Mild-to-Mod. = 1<br>Mod. = 3<br>Mod.-to-sev. = 1 | 8.2<br>7-10  | <b>Type: I Description:</b> SFA-based treatment involved 1) naming the picture 2) sorting pictures by category 3) identify semantic features 4) answer yes/no feature questions <b>Intensity:</b> 2x/week, 60 min, 24 weeks                                                                     | 54.96(13.77)<br>64.02(12.91)<br>9.06 | Level of Evidence: III/<br>class IV<br>Study protocol: +<br>Blinding: -<br>Sampling/allocation: C<br>Treatment fidelity: +<br>Significance of primary<br>outcome measure: -<br>Significance for st.<br>outcome of interest: -<br>Precision: +<br>Intention to treat: N/A |
| Kiran, Sandberg, & Abbott, 2009 | 4; 4;<br>M = 2;<br>F = 2 | 56.75(15.63)<br>39-77 | Anomic = 4                   | Mild = 4                                         | 25.5<br>8-43 | <b>Type: I Description:</b> SFA-based treatment involving: 1) category sorting 2) feature selection 3) yes/no feature questions 4) word recall and 5) free generative naming. <b>Intensity:</b> 24 sessions                                                                                     | 87.75(1.52)<br>90.58(1.63)<br>2.83   | Level of Evidence: III/<br>class IV<br>Study protocol: +<br>Blinding: -<br>Sampling/allocation: C<br>Treatment fidelity: +<br>Significance of primary<br>outcome measure: -<br>Significance for st.<br>outcome of interest: -<br>Precision: +<br>Intention to treat: N/A |

|                                         |                           |                       |                               |                                                  |                |                                                                                                                                                                                                                                                                                                                                                                                                                                                                                                                                                                                                              |                                      |                                                                                                                                                                                                                                                                           |
|-----------------------------------------|---------------------------|-----------------------|-------------------------------|--------------------------------------------------|----------------|--------------------------------------------------------------------------------------------------------------------------------------------------------------------------------------------------------------------------------------------------------------------------------------------------------------------------------------------------------------------------------------------------------------------------------------------------------------------------------------------------------------------------------------------------------------------------------------------------------------|--------------------------------------|---------------------------------------------------------------------------------------------------------------------------------------------------------------------------------------------------------------------------------------------------------------------------|
| Kiran, Sandberg, & Sebastian, 2011      | 6; 6;<br>M = 3;<br>F = 3  | 68.00(15.76)<br>39-84 | Anomic = 4<br>Conduction=3    | Mild-to-Mod. = 6                                 | 55.83<br>9-108 | <b>Type: I Description:</b> SFA-based treatment involving 1) category generation 2) category sorting 3) feature generation and/or selection and 4) answering yes/no feature questions <b>Intensity:</b> 2x/week, 120 min, 10 weeks                                                                                                                                                                                                                                                                                                                                                                           | 78.85(6.06)<br>81.98(8.77)<br>3.13   | Level of Evidence: III/<br>class IV<br>Study protocol: +<br>Blinding: -<br>Sampling/allocation: C<br>Treatment fidelity: +<br>Significance of primary<br>outcome measure: -<br>Significance for st.<br>outcome of interest: -<br>Precision: +<br>Intention to treat: N/A  |
| Lesser, Bryan, Anderson, & Hilton, 1986 | 13; 9;<br>M = 3;<br>F = 6 | 60.00(10.83)<br>40-76 | Broca's = 5<br>Conduction = 4 | Mild-to-Mod. = 3<br>Mod. = 4<br>Mod.-to-sev. = 2 | 15.56<br>2-33  | <b>Type: INT Description:</b> Language Enrichment Therapy (LET): 160 basic words were pictured in line drawings in sets of eight within language tasks of increasing complexity from picture-matching to understanding a text (28 units of complexity). Each unit repeated the same exercise 20 times with different vocabulary. Exercises involve comprehension, repetition, naming, constructing sentences, reading and writing. Spouse/volunteer can use materials with PWA between therapy visits. LET was supplemented with conversation and counseling. <b>Intensity:</b> 1x/week, 60 min, 10-12 weeks | 59.09(11.58)<br>65.60(14.79)<br>6.51 | Level of Evidence: IIB/<br>class III<br>Study protocol: +<br>Blinding: +<br>Sampling/allocation: C<br>Treatment fidelity: -<br>Significance of primary<br>outcome measure: -<br>Significance for st.<br>outcome of interest: -<br>Precision: +<br>Intention to treat: N/A |
| Macauley, 2006                          | 3; 3;<br>M = 3            | 63.00(4.00)<br>59-77  | Nonfluent = 3                 | Mild-to-Mod. = 3<br>Mod. = 1                     | 72<br>48-84    | <b>Type: INT Description:</b> Traditional Therapy 1) PWA asked to name a picture 2) SLP asks for a phrase using the word Animal-assisted therapy: 1) Stimuli cards were arranged throughout the room with dog treats on them 2) PWA asks dog to "find treat" 3) SLP picks up card from dog who just ate the treat and asks client to name it. SLP asks PWA to tell dog phrase containing the target word. 4) Dog shakes hand or barks to say "well done" when the PWA says it accurately. All PWA had both treatments. <b>Intensity:</b> 1x/week, 30 min, 24 weeks                                           | 74.37(10.65)<br>75.40(8.73)<br>1.03  | Level of Evidence: III/<br>class IV<br>Study protocol: +<br>Blinding: -<br>Sampling/allocation: C<br>Treatment fidelity: +<br>Significance of primary<br>outcome measure: -<br>Significance for st.<br>outcome of interest: -<br>Precision: +<br>Intention to treat: N/A  |

|                                                        |                          |                       |                           |                                      |                |                                                                                                                                                                                                                                                                                                                                                                                                                                  |                                      |                                                                                                                                                                                                                                                                          |
|--------------------------------------------------------|--------------------------|-----------------------|---------------------------|--------------------------------------|----------------|----------------------------------------------------------------------------------------------------------------------------------------------------------------------------------------------------------------------------------------------------------------------------------------------------------------------------------------------------------------------------------------------------------------------------------|--------------------------------------|--------------------------------------------------------------------------------------------------------------------------------------------------------------------------------------------------------------------------------------------------------------------------|
| Marshall, Laures-Gore, DuBay, Williams, & Bryant, 2015 | 3; 3;<br>M = 1;<br>F = 2 | 58.00(13.89)<br>49-74 | Broca's = 2<br>Global = 1 | Mod. = 1<br>Mod.-to-sev. = 2         | 18.33<br>12-22 | <b>Type:</b> INT <b>Description:</b> PWA received conventional speech therapy while also practicing unilateral nostril breathing techniques (i.e., diaphragmatic breathing and close nostril on their affected side, inhale through the open nostril and exhale for twice as long than their inhalation). <b>Intensity:</b> 2x/week, 40 min, avg. 14 weeks (14-18 weeks)                                                         | 38.33(12.52)<br>40.63(6.75)<br>2.30  | Level of Evidence: III/<br>class IV<br>Study protocol: +<br>Blinding: -<br>Sampling/allocation: C<br>Treatment fidelity: -<br>Significance of primary<br>outcome measure: -<br>Significance for st.<br>outcome of interest: -<br>Precision: +<br>Intention to treat: N/A |
| Milman, Clendenen, & Vega-Mendoza, 2014a               | 3; 3;<br>M = 3           | N/A(N/A)<br>56-68     | Nonfluent = 3             | Mod. =1<br>Mod.-to-sev. = 2          | n/a<br>12-84   | <b>Type:</b> INT <b>Description:</b> Functional use of adjectives to describe people in four different tasks: 1) single-word adjective production 2) single-word pronoun production 3) sentence training and 4) discourse production. Semantic, orthographic and phonemic cues were given to facilitate single word use. <b>Intensity:</b> 4x/week, 60 min, avg. 9 weeks (5-12 weeks)                                            | 43.70(8.75)<br>51.40(16.41)<br>7.70  | Level of Evidence: III/<br>class IV<br>Study protocol: +<br>Blinding: -<br>Sampling/allocation: C<br>Treatment fidelity: +<br>Significance of primary<br>outcome measure: -<br>Significance for st.<br>outcome of interest: -<br>Precision: +<br>Intention to treat: N/A |
| Milman, Vega-Mendoza, & Clendenen, 2014b               | 3; 3;<br>M = 1;<br>F = 2 | 62.33(6.35)<br>55-66  | Non-fluent = 3            | Mild-to-Mod. = 1<br>Mod.-to-sev. = 2 | 41<br>22-61    | <b>Type:</b> INT <b>Description:</b> Each individual session targeted: 1) word retrieval 2) sentence production and 3) discourse-level communication to integrate training received in steps 1 and 2. Daily homework was assigned focusing on material from steps 1 and 2. Group session once weekly to transfer skills from individual therapy to conversational level. <b>Intensity:</b> 4x/week, 60 min, avg. 11 weeks (6-18) | 47.07(27.67)<br>52.67(26.37)<br>5.60 | Level of Evidence: III/<br>class IV<br>Study protocol: +<br>Blinding: -<br>Sampling/allocation: C<br>Treatment fidelity: +<br>Significance of primary<br>outcome measure: +<br>Significance for st.<br>outcome of interest: -<br>Precision: +<br>Intention to treat: N/A |



|                                            |                          |                       |                                                                     |                                                  |                |                                                                                                                                                                                                                                                                                                                                                                                                                                                                                                                                                                                                                   |                                      |                                                                                                                                                                                                                                                                          |
|--------------------------------------------|--------------------------|-----------------------|---------------------------------------------------------------------|--------------------------------------------------|----------------|-------------------------------------------------------------------------------------------------------------------------------------------------------------------------------------------------------------------------------------------------------------------------------------------------------------------------------------------------------------------------------------------------------------------------------------------------------------------------------------------------------------------------------------------------------------------------------------------------------------------|--------------------------------------|--------------------------------------------------------------------------------------------------------------------------------------------------------------------------------------------------------------------------------------------------------------------------|
| Mozeiko, Coelho, & Myers, 2016_Intensive   | 4; 4;<br>M = 2;<br>F = 2 | 54.50(20.63)<br>26-72 | Broca's = 2<br>Not classifiable = 1<br>Global = 1                   | Mild-to-Mod. = 1<br>Mod.-to-sev. = 2<br>Sev. = 1 | 65.4<br>18-134 | <b>Type:</b> A/P <b>Description:</b> Intensive Constraint Induced Language Therapy (CILT) (i.e., 5x/week): PWA participated in a Go Fish game wherein they had to ask one another for a card that matches one of their own. SLP increases the difficulty level by accepting different responses: Level 1) single word response with high frequency cards and Level 2) introduces a carrier phrase to the single word 3) adds an adjective to the carrier phrase with a single word response 4) adds two adjectives to the carrier phrase with a single word response. <b>Intensity:</b> 5x/week, 180 min, 2 weeks | 38.05(20.00)<br>46.35(20.97)<br>8.30 | Level of Evidence: III/<br>class IV<br>Study protocol: +<br>Blinding: -<br>Sampling/allocation: C<br>Treatment fidelity: -<br>Significance of primary<br>outcome measure: -<br>Significance for st.<br>outcome of interest: -<br>Precision: +<br>Intention to treat: N/A |
| Mozeiko, Coelho, & Myers, 2016_Distributed | 4; 4;<br>M = 3;<br>F = 2 | 59.50(13.50)<br>47-77 | Broca's = 1<br>Anomic = 1<br>Conduction = 1<br>Not classifiable = 1 | Mild-to-Mod. = 1<br>Mod. = 1<br>Mod.-to-Sev. = 2 | 36<br>13-96    | <b>Type:</b> A/P <b>Description:</b> Distributed Constraint Induced Language Therapy (CILT) (i.e., 3x/week) PWA participated in a Go Fish game wherein they had to ask one another for a card that matches one of their own. SLP increases the difficulty level by accepting different response Level 1) single word response with high frequency cards and Level 2) introduces a carrier phrase to the single word 3) adds an adjective to the carrier phrase with a single word response 4) adds two adjectives to the carrier phrase with a single word response. <b>Intensity:</b> 3x/week, 60min, 10 weeks   | 59.20(24.72)<br>62.08(23.19)<br>2.88 | Level of Evidence: III/<br>class IV<br>Study protocol: +<br>Blinding: -<br>Sampling/allocation: C<br>Treatment fidelity: -<br>Significance of primary<br>outcome measure: -<br>Significance for st.<br>outcome of interest: -<br>Precision: +<br>Intention to treat: N/A |
| Purdy & Wallace, 2015                      | 3; 3;<br>M = 3           | 53.33(12.22)<br>40-64 | Broca's = 3                                                         | Mod.-to-sev. = 1<br>Sev. = 2                     | 26.67<br>10-48 | <b>Type:</b> 1 <b>Description:</b> 1) Multimodality training of nouns and 2) training communicative use of the targets (i.e., Promoting Aphasic's Communication Effectiveness (PACE) (Davis & Wilcox, 1985) <b>Intensity:</b> 5x/week, 120-180 min, 2 weeks                                                                                                                                                                                                                                                                                                                                                       | 22.27(4.97)<br>25.63(2.83)<br>3.37   | Level of Evidence: III/<br>class IV<br>Study protocol: +<br>Blinding: -<br>Sampling/allocation: C<br>Treatment fidelity: +<br>Significance of primary<br>outcome measure: -<br>Significance for st.<br>outcome of interest: -<br>Precision: +<br>Intention to treat: N/A |

|                                   |                          |                       |                                                     |                                                              |              |                                                                                                                                                                                                                                                                                                                                                                                                                                                                                                                                                                                                                                                             |                                      |                                                                                                                                                                                                                                                                          |
|-----------------------------------|--------------------------|-----------------------|-----------------------------------------------------|--------------------------------------------------------------|--------------|-------------------------------------------------------------------------------------------------------------------------------------------------------------------------------------------------------------------------------------------------------------------------------------------------------------------------------------------------------------------------------------------------------------------------------------------------------------------------------------------------------------------------------------------------------------------------------------------------------------------------------------------------------------|--------------------------------------|--------------------------------------------------------------------------------------------------------------------------------------------------------------------------------------------------------------------------------------------------------------------------|
| Raymer, Kohen, & Saffell, 2006a   | 5; 5;<br>M = 2;<br>F = 3 | 70.80(12.11)<br>51-82 | Conduction = 2<br>Broca's = 2<br>Mixed = 1          | Mild-to-Mod. = 2<br>Mod.-to-sev. = 3                         | 18.4<br>4-42 | <b>Type: I Description:</b> MossTalk Words (i.e., computer-assisted treatment program). PWA completed multi-modal matching exercises involving 1) spoken plus written word to picture matching 2) spoken word to picture matching 3) written word to picture matching<br><b>Intensity:</b> 1-2x/week, 60 min, 6-12 weeks, then, 3-4x/week, 60 min 3-4 weeks. 4 week break in between each 12-hour tx. phase.                                                                                                                                                                                                                                                | 53.32(19.14)<br>57.40(17.26)<br>4.08 | Level of Evidence: III/<br>class IV<br>Study protocol: +<br>Blinding: -<br>Sampling/allocation: C<br>Treatment fidelity: -<br>Significance of primary<br>outcome measure: +<br>Significance for st.<br>outcome of interest: -<br>Precision: +<br>Intention to treat: N/A |
| Raymer, Singletary, et al., 2006b | 9; 9;<br>M = 6;<br>F = 3 | 60.67(9.08) 49-<br>70 | Broca's = 6<br>Wernicke's = 2<br>Conduction = 1     | Mild-to-Mod. = 1<br>Mod. = 4<br>Mod.-to-sev. = 3<br>Sev. = 1 | 29<br>5-62   | <b>Type: I Description:</b> Gesture-Verbal Treatment (GVT): 1) SLP showed the picture and modeled the target word and a gesture. 2) PWA produced word and gesture three times 3) SLP showed gesture in isolation and participant imitated three times 4) SLP presented the target and PWA repeated it three times 4) After a 5-second delay, SLP prompted participant to show and tell them what happened in the picture. <b>Intensity:</b> 3-4x/week, 60 min, 10 weeks                                                                                                                                                                                     | 47.64(16.89)<br>52.43(15.46)<br>4.79 | Level of Evidence: III/<br>class IV<br>Study protocol: +<br>Blinding: -<br>Sampling/allocation: C<br>Treatment fidelity: -<br>Significance of primary<br>outcome measure: +<br>Significance for st.<br>outcome of interest: +<br>Precision: +<br>Intention to treat: N/A |
| Raymer et al., 2012               | 8; 8;<br>M = 4;<br>F = 4 | 58.13(14.30)<br>40-79 | Broca's = 4<br>TMA = 2<br>TSA = 1<br>Wernicke's = 1 | Mild-to-Mod. = 1<br>Mod. = 7                                 | 13.5<br>5-30 | <b>Type: I Description:</b> Errorless Naming: 1) SLP modeled the picture name and PWA repeated 2) SLP showed the written word and PWA read it aloud three times 3) Written word was removed and PWA was given 5 seconds to hold onto it 4) SLP prompted PWA to name it again. Gestural Facilitation: 1) SLP modelled the name and a related gesture 2) SLP modelled the gesture alone for SLP to imitate three times 3) SLP modelled name and PWA repeated three times 4) Clinician modelled gesture while showing the picture 5) After 5 second delay SLP prompted PWA to provide name and gesture again.<br><b>Intensity:</b> 2-3x/week, 60 min, 10 weeks | 56.91(5.43)<br>63.40(11.46)<br>2.50  | Level of Evidence: III/<br>class IV<br>Study protocol: +<br>Blinding: -<br>Sampling/allocation: C<br>Treatment fidelity: +<br>Significance of primary<br>outcome measure: -<br>Significance for st.<br>outcome of interest: -<br>Precision: +<br>Intention to treat: N/A |

|                                           |                            |                       |                                                 |                                                              |                 |                                                                                                                                                                                                                                                                                                                                                                                                                                                                                                                                                                                                                                                                                                                                                                                                                   |                                      |                                                                                                                                                                                                                                                                          |
|-------------------------------------------|----------------------------|-----------------------|-------------------------------------------------|--------------------------------------------------------------|-----------------|-------------------------------------------------------------------------------------------------------------------------------------------------------------------------------------------------------------------------------------------------------------------------------------------------------------------------------------------------------------------------------------------------------------------------------------------------------------------------------------------------------------------------------------------------------------------------------------------------------------------------------------------------------------------------------------------------------------------------------------------------------------------------------------------------------------------|--------------------------------------|--------------------------------------------------------------------------------------------------------------------------------------------------------------------------------------------------------------------------------------------------------------------------|
| Rider, Wright, Marshall, & Page, 2008     | 3; 3;<br>M = 2;<br>F = 1   | 63.33(9.07)<br>55-73  | Nonfluent = 3                                   | Mild-to-Mod. = 2<br>Mod. = 1                                 | 65.67<br>26-126 | <b>Type: I Description:</b> Trained words related to 6-8 contexts (i.e., story retell and procedural narratives) using SFA (e.g., Boyle, 2004 Boyle & Coelho, 1995) <b>Intensity:</b> 2-3x/week, 60 min, 7-14 weeks                                                                                                                                                                                                                                                                                                                                                                                                                                                                                                                                                                                               | 72.30(5.71)<br>73.43(8.00)<br>1.13   | Level of Evidence: III/<br>class IV<br>Study protocol: +<br>Blinding: -<br>Sampling/allocation: C<br>Treatment fidelity: +<br>Significance of primary<br>outcome measure: +<br>Significance for st.<br>outcome of interest: +<br>Precision: +<br>Intention to treat: N/A |
| Rodriguez, Raymer, & Rothi, 2006          | 4; 4;<br>M = 3;<br>F = 1   | 65.00(9.76)<br>52-73  | Conduction = 2<br>Wernicke's = 1<br>Broca's = 1 | Mild-to-Mod. = 1<br>Mod. = 1<br>Mod.-to-sev. = 2             | 34.25<br>8-96   | <b>Type: I Description:</b> All PWA received both verb naming treatments. Gesture-Verbal Treatment (GVT): 1) SLP showed the picture and modeled the target word and a gesture. 2) PWA produced word and gesture three times 3) SLP showed gesture in isolation and PWA imitated three times 4) SLP presented the target and PWA repeated it three times 4) After a 5-second delay, SLP prompted participant to show and tell them what happened in the target picture. Semantic-Phonologic Treatment: 1) SLP showed PWA the picture and modeled the target word 2) PWA answered semantic and phonologic questions about the target 3) PWA produced the target three times 4) After a 5-second delay, PWA attempted to explain what was happening in the picture. <b>Intensity:</b> 2-3x/week, 60 min, 10-14 weeks | 53.40(18.00)<br>56.45(20.18)<br>3.05 | Level of Evidence: III/<br>class IV<br>Study protocol: +<br>Blinding: -<br>Sampling/allocation: C<br>Treatment fidelity: -<br>Significance of primary<br>outcome measure: -<br>Significance for st.<br>outcome of interest: -<br>Precision: +<br>Intention to treat: N/A |
| Rose, Attard, Mok, Lanyon, & Foster, 2013 | 11; 11;<br>M = 6;<br>F = 5 | 58.09(10.63)<br>39-74 | Broca's = 6<br>Anomic = 4,<br>Conduction = 1    | Mild = 2<br>Mild-to-Mod. = 2<br>Mod. = 6<br>Mod.-to-sev. = 1 | 44<br>17-88     | <b>Type: A/P Description:</b> PWA targeted word retrieval in small groups through treatment activities including (i.e., Go Fish, Memory, Request Role plays, Board games, rapid naming while playing snap, Who am I) In CIAT Plus: Verbal production was the goal but cueing was provided as needed (i.e., phonemic cue, written cue). In multi-modal aphasia therapy (M-MAT): Verbal production was also the goal but, multi-modal cueing was provided (i.e., gesture, drawing, written model, verbal model). All PWA received both treatments. <b>Intensity:</b> 4x/week, 195 min, 2 weeks                                                                                                                                                                                                                      | 66.26(18.29)<br>70.78(16.55)<br>4.52 | Level of Evidence: III/<br>class IV<br>Study protocol: +<br>Blinding: -<br>Sampling/allocation: C<br>Treatment fidelity: +<br>Significance of primary<br>outcome measure: -<br>Significance for st.<br>outcome of interest: +<br>Precision: +<br>Intention to treat: N/A |

|                                       |                            |                       |                                                                             |                                                                   |                 |                                                                                                                                                                                                                                                                                                                                                                                                                                                                                                                                     |                                       |                                                                                                                                                                                                                                                                          |
|---------------------------------------|----------------------------|-----------------------|-----------------------------------------------------------------------------|-------------------------------------------------------------------|-----------------|-------------------------------------------------------------------------------------------------------------------------------------------------------------------------------------------------------------------------------------------------------------------------------------------------------------------------------------------------------------------------------------------------------------------------------------------------------------------------------------------------------------------------------------|---------------------------------------|--------------------------------------------------------------------------------------------------------------------------------------------------------------------------------------------------------------------------------------------------------------------------|
| Sandberg, Bohland, & Kiran, 2015      | 10; 10;<br>M = 3;<br>F = 7 | 59.40(10.01)<br>47-75 | Anomic = 6<br>Conduction = 2<br>Broca's = 1<br>TCM = 1                      | Above cut-off = 3<br>Mild = 1<br>Mild-to-Mod. =<br>Mod.-to-sev. = | 55.7<br>7-134   | <b>Type: I Description:</b> PWA were trained on ten abstract words in a particular context category (e.g., courthouse) and ten untrained concrete words from the same context-category were monitored to measure generalization. Treatment steps included 1) Feature selection 2) Abstract/concrete lexical decision 3) Synonym generation<br><b>Intensity:</b> 2x/week, 120 min, 10 weeks                                                                                                                                          | 80.52(17.41)<br>84.32(15.00)<br>3.80  | Level of Evidence: III/<br>class IV<br>Study protocol: +<br>Blinding: -<br>Sampling/allocation: C<br>Treatment fidelity: -<br>Significance of primary<br>outcome measure: -<br>Significance for st.<br>outcome of interest: -<br>Precision: +<br>Intention to treat: N/A |
| Schneider & Thompson, 2003            | 7; 6;<br>N/A               | N/A(N/A) N/A          | Broca's                                                                     | Mild-to-Mod. = 5<br>Mod. = 1                                      | N/A<br>39-132   | <b>Type: I Description:</b> Semantic verb retrieval treatment or argument structure verb retrieval treatment was applied to a category of verbs. Semantic treatment focused on the meaning of verb and argument structure focused on number of argument structures pertaining to the verb and its thematic role assignment. Treatment involved 3 steps: 1) Presentation of the item 2) Presentation of the meaning or thematic role information for the verb being trained 3) PWA names the item. <b>Intensity:</b> 24 sessions     | 72.43(6.44)<br>76.60(4.39)<br>4.17    | Level of Evidence: III/<br>class IV<br>Study protocol: +<br>Blinding: -<br>Sampling/allocation: C<br>Treatment fidelity: +<br>Significance of primary<br>outcome measure: +<br>Significance for st.<br>outcome of interest: +<br>Precision: +<br>Intention to treat: N/A |
| Silkes, 2015                          | 4; 4;<br>N/A               | 60.25(1.26)<br>49-60  | Nonfluent = 1<br>Fluent = 3                                                 | Mild=1<br>Mild-to-Mod. = 3                                        | 58.5<br>24-96   | <b>Type: I Description:</b> Masked repetition priming treatment: Each section PWA saw prime-picture pair 16 times and had four opportunities to name each picture. PWA were instructed to watch the screen and try to name the picture when they saw it for the 4th time. <b>Intensity:</b> 2x/day XX 12 days                                                                                                                                                                                                                       | 75.13(9.56)<br>76.33(6.98)<br>1.20.00 | Level of Evidence: III/<br>class IV<br>Study protocol: +<br>Blinding: -<br>Sampling/allocation: C<br>Treatment fidelity: -<br>Significance of primary<br>outcome measure: -<br>Significance for st.<br>outcome of interest: -<br>Precision: +<br>Intention to treat: N/A |
| Steele, Baird, McCall, & Haynes, 2014 | 9; 9;<br>M = 7;<br>F = 2   | 61.44(10.42)<br>N/A   | Broca's = 5<br>TCM = 1<br>Wernicke's = 1<br>Isolation = 1<br>Conduction = 1 | Mod.                                                              | 66.72<br>16-230 | <b>Type: INT Description:</b> Individual therapy (i.e., improving conversational skills using script training, sentence patterning and response elaboration), group therapy (i.e., word retrieval, improve speech intelligibility, train social exchanges, train longer and more complex sentences, increase conversational turns, improve well-being, increase life participation)and online language exercises (i.e., Talk Path: listening, speaking, reading and writing activities) <b>Intensity:</b> 2x/week 60 min 20.6 weeks | 53.90(9.40)<br>57.40(10.40)<br>3.50   | Level of Evidence: III/<br>class IV<br>Study protocol: +<br>Blinding: -<br>Sampling/allocation: C<br>Treatment fidelity: +<br>Significance of primary<br>outcome measure: +<br>Significance for st.<br>outcome of interest: +                                            |

|                                           |                          |                       |                                                        |                                                                                              |                |                                                                                                                                                                                                                                                                                                                                                                                                                                                          |                                        |                                                                                                                                                                                                                                                                    |
|-------------------------------------------|--------------------------|-----------------------|--------------------------------------------------------|----------------------------------------------------------------------------------------------|----------------|----------------------------------------------------------------------------------------------------------------------------------------------------------------------------------------------------------------------------------------------------------------------------------------------------------------------------------------------------------------------------------------------------------------------------------------------------------|----------------------------------------|--------------------------------------------------------------------------------------------------------------------------------------------------------------------------------------------------------------------------------------------------------------------|
|                                           |                          |                       |                                                        |                                                                                              |                |                                                                                                                                                                                                                                                                                                                                                                                                                                                          |                                        | Precision: +<br>Intention to treat: N/A                                                                                                                                                                                                                            |
| Thompson, Shapiro, Kiran, & Sobecks, 2003 | 4;4;<br>N/A              | N/A(N/A) N/A          | Broca's = 4                                            | Mild-to-Mod. = 2<br>Mod. = 2                                                                 | N/A<br>12-132  | <b>Type: I Description:</b> Trained to comprehend & produce different sentence <b>Types</b> using Treatment of Underlying Forms (Thompson, 2001) <b>Intensity:</b> 2x/week 120 min 3-9 weeks                                                                                                                                                                                                                                                             | 66.20(5.51)<br>68.38(7.04)<br>2.175.00 | Level of Evidence: III/<br>class IV<br>Study protocol: +<br>Blinding: -<br>Sampling/allocation: C<br>Treatment fidelity: +<br>Significance of primary outcome measure: -<br>Significance for st. outcome of interest: -<br>Precision: +<br>Intention to treat: N/A |
| Waller, Dennis, Brodie, & Cairns, 1998    | 4; 3;<br>M = 2;<br>F = 1 | 62.33(10.21)<br>55-74 | Nonfluent = 3                                          | Mod. = 2<br>Sev. = 1                                                                         | 31.56<br>15-78 | <b>Type: INT Description:</b> PWA were trained to retrieve pre-programmed items in their TalkBac (i.e., word-based AAC device with personal sentences and stories) by SLP. Trained caregivers provided opportunities to elicit those phrases and SLP visited weekly to provide support. Three group sessions were organized to allow caregivers and subjects to meet and discuss pros and cons of the project. <b>Intensity:</b> 1x/week 90 min 52 weeks | 38.77(28.34)<br>45.77(31.88)<br>7.00   | Level of Evidence: III/<br>class IV<br>Study protocol: +<br>Blinding: -<br>Sampling/allocation: C<br>Treatment fidelity: +<br>Significance of primary outcome measure: -<br>Significance for st. outcome of interest: -<br>Precision: +<br>Intention to treat: N/A |
| Wilson et al., 2012                       | 9;9;<br>M = 8;<br>F = 1  | 52.22(9.73)<br>28-62  | Anomic = 5<br>Nonfluent = 2<br>Global = 1<br>Mixed = 1 | Above cut-off = 1<br>Mild = 3<br>Mild-to-Mod. = 2<br>Mod. = 1<br>Mod.-to-sev. = 1<br>Sev.= 1 | 22.68<br>6-66  | <b>Type: INT Description:</b> PWA participated in Intensive Residential Aphasia Communication Theraprogram (InteRACT Carey et al. 2006). Five hours of daily treatment included focus on speech and language skills, functional communication strategy usage, community re-integration and communication partner training. <b>Intensity:</b> 5x/week 300 min 4 weeks                                                                                     | 69.91(28.85)<br>76.09(25.25)<br>6.18   | Level of Evidence: IIA/<br>class II<br>Study protocol: +<br>Blinding: -<br>Sampling/allocation: C<br>Treatment fidelity: -<br>Significance of primary outcome measure: -<br>Significance for st. outcome of interest: -<br>Precision: +<br>Intention to treat: N/A |

### Supplementary Material 5: Demographic information for within group studies using Communicative Effectiveness Index

Note: M=Male; F = Female; TCM = transcortical motor; TSM = transcortical sensory; sev. = severe; I = Impairment-based treatment; A/P = activity/participation-based treatment; INT = integrated treatment; st. = standardized; CS = convenience sample

| Study Name                           | Study N; N for outcome measure; Sex | Mean Age(SD) range    | Aphasia Type                                                                                                       | Aphasia Severity (WAB-AQ)  | Mean MPO range  | Treatment(Tx)                                                                                                                                                                                                                                                                                                                                                   | Pre-Tx M(SD)<br>Post-Tx M(SD)<br>Change Score | Methodological Rigor                                                                                                                                                                                                                                             |
|--------------------------------------|-------------------------------------|-----------------------|--------------------------------------------------------------------------------------------------------------------|----------------------------|-----------------|-----------------------------------------------------------------------------------------------------------------------------------------------------------------------------------------------------------------------------------------------------------------------------------------------------------------------------------------------------------------|-----------------------------------------------|------------------------------------------------------------------------------------------------------------------------------------------------------------------------------------------------------------------------------------------------------------------|
| Aftonomos, Appelbaum, & Steele, 1999 | 60; 29; M=35; F=25                  | 68.60(12.30)<br>24-86 | Broca's= 21<br>Anomic = 13<br>Global = 11<br>Wernicke's = 8<br>Conduction = 3<br>TCM = 2<br>TSM = 1<br>Isolation=1 | Mod.-to-sev.               | 24.6<br>.24-144 | <b>Type:</b> INT <b>Description:</b> Individual treatment using the Lingraphica (icon-based language system) to provide therapeutic exercises at the appropriate level for participants' severity. Also, focused on improving functional communication outside of the clinic as well as provided home exercises. <b>Intensity:</b> 2x/week, 60 min, 20. 5 weeks | 42.80(19.00)<br>62.60 (18.60)<br>19.80        | Level of Evidence: IIB/clas: III<br>Study protocol: +<br>Blinding: -<br>Sampling/allocation: CS<br>Treatment fidelity: -<br>Significance of primary outcome measure: +<br>Significance for st. outcome of interest: +<br>Precision: +<br>Intention to treat: N/A |
| Archibald, Orange, & Jamieson, 2009  | 8; 3; M=2; F=1                      | 77.67(9.02)<br>69-87  | Broca's=1<br>Anomic =1<br>Global =1                                                                                | Mod.=1 Mod.-<br>to-sev. =2 | 44.66<br>10-105 | <b>Type:</b> I <b>Description:</b> Computer-provided treatment via AphasiaMate across 8 modules (i.e., auditory comprehension, visual matching, reading comprehension, spelling, semantics, sentence processing). Patients used computer at home or in clinic with trained personnel. <b>Intensity:</b> 1x/week, 60 min, 15 weeks                               | 41.67(3.79)<br>51.67(6.66)<br>10              | Level of Evidence: IIB/clas: III<br>Study protocol: +<br>Blinding: -<br>Sampling/allocation: CS<br>Treatment fidelity: -<br>Significance of primary outcome measure: +<br>Significance for st. outcome of interest: +<br>Precision: +<br>Intention to treat: N/A |

|                                                 |                         |                       |                                                      |              |               |                                                                                                                                                                                                                                                                                                                                                                                                                 |                                       |                                                                                                                                                                                                                                                                  |
|-------------------------------------------------|-------------------------|-----------------------|------------------------------------------------------|--------------|---------------|-----------------------------------------------------------------------------------------------------------------------------------------------------------------------------------------------------------------------------------------------------------------------------------------------------------------------------------------------------------------------------------------------------------------|---------------------------------------|------------------------------------------------------------------------------------------------------------------------------------------------------------------------------------------------------------------------------------------------------------------|
| Babbitt, Worrall, & Cherney, 2015               | 74;74;<br>M=52;<br>F=22 | 54.10(16.30)<br>18-86 | Nonfluent = 49<br>Fluent = 25                        | Mod.         | 15.5<br>3-87  | <b>Type:</b> INT <b>Description:</b> Intensive Comprehensive Aphasia Program (ICAP): two individual therapy sessions and one session each of constraint-induced language therapy (CILT), reading/writing, computers and conversation group for six hours of daily programming. <b>Intensity:</b> 5x/week, 240 min, 4 weeks                                                                                      | 46.80(15.70)<br>58.20(16.20)<br>11.4  | Level of Evidence: IIB/class III<br>Study protocol: +<br>Blinding: -<br>Sampling/allocation: CS<br>Treatment fidelity: +<br>Significance of primary outcome measure: +<br>Significance for st. outcome of interest: +<br>Precision: +<br>Intention to treat: N/A |
| Barthel, Meinzer, Djundja, & Rockstroh, 2008    | 12; 12;<br>M=5;<br>F=7  | 55.20(14.20)<br>35-76 | Broca's=8<br>Anomic=1<br>Global=1<br>Non-standard=2  | Mod.-to-sev. | 64<br>13-156  | <b>Type:</b> INT <b>Description:</b> Model-oriented aphasia therapy (MOAT) was provided on an individual basis. It combines model-oriented aphasia therapy (i.e., target semantic system), linguistic approach (i.e., target phonological errors), strategy approach (i.e., paraphrasing), communicative approach (i.e., role playing) and involvement of relatives. <b>Intensity:</b> 1x/day, 180 min, 10 days | 42.60(21.30)<br>51.80(20.90)<br>9.20  | Level of Evidence: IIB/class III<br>Study protocol: +<br>Blinding: -<br>Sampling/allocation: CS<br>Treatment fidelity: -<br>Significance of primary outcome measure: +<br>Significance for st. outcome of interest: +<br>Precision: +<br>Intention to treat: N/A |
| Code, Torney, Gildea-Howardine, & Willmes, 2010 | 8; 7;<br>M=6;<br>F=1    | 52.71(13.40)<br>36-73 | Broca's= 3<br>Global= 2<br>Wernicke= 1<br>Amnesic= 1 | Mod.         | 34.43<br>9-70 | <b>Type:</b> INT <b>Description:</b> Individual and group therapy was administered based on participants' pre-treatment testing results. Weekly counseling was offered to caregivers & participants. <b>Intensity:</b> 5x/week, 4 weeks                                                                                                                                                                         | 45.00(10.10)<br>57.50(24.10)<br>12.50 | Level of Evidence: IIB/class III<br>Study protocol: -<br>Blinding: +<br>Sampling/allocation: CS<br>Treatment fidelity: -<br>Significance of primary outcome measure: +<br>Significance for st. outcome of interest: +<br>Precision: +<br>Intention to treat: N/A |

|                                          |                       |                       |                                                   |                    |                |                                                                                                                                                                                                                                                                                                                                                                                                                                       |                                      |                                                                                                                                                                                                                                                                 |
|------------------------------------------|-----------------------|-----------------------|---------------------------------------------------|--------------------|----------------|---------------------------------------------------------------------------------------------------------------------------------------------------------------------------------------------------------------------------------------------------------------------------------------------------------------------------------------------------------------------------------------------------------------------------------------|--------------------------------------|-----------------------------------------------------------------------------------------------------------------------------------------------------------------------------------------------------------------------------------------------------------------|
| Edmonds, Mammino, & Ojeda, 2014          | 11; 9;<br>M=6;<br>F=4 | 63.30(13.07)<br>35-81 | Anomic=5<br>Conduction=2<br>TCM=2<br>Wernicke's=1 | Mod.               | 57.5<br>14-144 | <b>Type:</b> I <b>Description:</b> Verb Network Strengthening Treatment (VNeST): PWA were given a verb then, asked to retrieve related agents and patients. They are encouraged and supported to generate multiple pairs of agents and patients for each verb. <b>Intensity:</b> 2x/week, 120 min, 10 weeks                                                                                                                           | 32.61(9.70)<br>65.28(11.20)<br>32.67 | Level of Evidence: III/class IV<br>Study protocol: +<br>Blinding: -<br>Sampling/allocation: CS<br>Treatment fidelity: +<br>Significance of primary outcome measure: +<br>Significance for st. outcome of interest: +<br>Precision: +<br>Intention to treat: N/A |
| Johnson, Hough, King, Vos, & Jeffs, 2008 | 3; 3;<br>M=1;<br>F=2  | 67.67(10.07)<br>57-77 | Broca's =2<br>Mixed =1                            | Mod.=2<br>Sev. = 1 | 52.68<br>27-93 | <b>Type:</b> INT <b>Description:</b> Intensive therapy using computer-based augmentative alternative communication (AAC) (i.e., symbol identification, navigation, scenario role play, sentences). It involved training caregiver in therapy and use of an AAC device to reduce the severity of the impairment and increase activities and participation. <b>Intensity:</b> 3-4x/week, 60 min, 12 weeks                               | 26.27(13.49)<br>38.93(3.09)<br>12.66 | Level of Evidence: III/class IV<br>Study protocol: +<br>Blinding: -<br>Sampling/allocation: CS<br>Treatment fidelity: -<br>Significance of primary outcome measure: -<br>Significance for st. outcome of interest: -<br>Precision: +<br>Intention to treat: N/A |
| Milman, Vega-Mendoza, & Clendenen, 2014  | 3;3;<br>M=1;<br>F=2   | 62.33(6.35)<br>55-66  | Nonfluent=3                                       | Mod.=2             | 41<br>40-66    | <b>Type:</b> INT <b>Description:</b> Each individual session targeted: 1) word retrieval 2) sentence production and 3) discourse-level communication to integrate training received in steps 1 and 2. Daily homework was assigned focusing on material from steps 1 and 2. Group session once weekly to transfer skills from individual therapy to conversational level. <b>Intensity:</b> 4x/week, 60 min, avg. 9 weeks (5-12 weeks) | 48.77(10.46)<br>49.83(14.91)<br>1.07 | Level of Evidence: III/class IV<br>Study protocol: +<br>Blinding: -<br>Sampling/allocation: CS<br>Treatment fidelity: +<br>Significance of primary outcome measure: +<br>Significance for st. outcome of interest: -<br>Precision: +<br>Intention to treat: N/A |



|                         |                      |                       |                                                 |                                                         |               |                                                                                                                                                                                                                                                                                                                                                                                                                                                                                                                                                                                                                                                               |                                        |                                                                                                                                                                                                                                                                 |
|-------------------------|----------------------|-----------------------|-------------------------------------------------|---------------------------------------------------------|---------------|---------------------------------------------------------------------------------------------------------------------------------------------------------------------------------------------------------------------------------------------------------------------------------------------------------------------------------------------------------------------------------------------------------------------------------------------------------------------------------------------------------------------------------------------------------------------------------------------------------------------------------------------------------------|----------------------------------------|-----------------------------------------------------------------------------------------------------------------------------------------------------------------------------------------------------------------------------------------------------------------|
| Nickels & Osborne, 2016 | 4; 4;<br>M=3;<br>F=1 | 59.75(18.66)<br>34-74 | Global= 2<br>Anomic= 1<br>TCS= 1                | Mild-to-Mod.= 1<br>Mod.=1<br>Mod.-to-sev.= 2            | 25.8<br>15-42 | <b>Type:</b> A/P <b>Description:</b> Constraint Induced Aphasia Therapy Plus (CIAT-plus): Therapy addressed verbal expression through Go Fish. 1) Volunteer played the game with two PWA. 2) PWA chose a card and asked the other players for a card. 3) Co-player then responded. PWA could use multi-modal communication, as needed. Shaping was included to increase the complexity of their verbal responses. <b>Intensity:</b> 2x/week, 90 min, 4 weeks                                                                                                                                                                                                  | 61.75(11.27)<br>61.00(11.60)<br>-.75   | Level of Evidence: III/class IV<br>Study protocol: +<br>Blinding: -<br>Sampling/allocation: CS<br>Treatment fidelity: +<br>Significance of primary outcome measure: +<br>Significance for st. outcome of interest: +<br>Precision: +<br>Intention to treat: N/A |
| Raymer et al., 2012     | 8; 6;<br>M=2;<br>F=4 | 60.33(14.49)<br>47-79 | Broca's= 3<br>TMA =1<br>TSA =1<br>Wernicke's= 1 | Mild= 1<br>Mild-to-Mod.= 2<br>Mod.=2<br>Mod.-to-sev.= 1 | 14<br>5-30    | <b>Type:</b> I <b>Description:</b> Errorless Naming: 1) SLP modeled the picture name and PWA repeated 2)SLP showed the written word and PWA read it aloud three times 3)Written word was removed and PWA was given 5 seconds to hold onto it 4) SLP prompted PWA to name it again. Gestural Facilitation: 1) SLP modelled the name and a related gesture 2) SLP modelled the gesture alone for SLP to imitate three times 3) SLP modelled name and PWA repeated three times 4) Clinician modelled gesture while showing the picture 5) After 5 second delay SLP prompted PWA to provide name and gesture again. <b>Intensity:</b> 2-3x/week, 60 min, 10 weeks | 64.37(19.91)<br>59.27(20.42) -<br>5.09 | Level of Evidence: III/class IV<br>Study protocol: +<br>Blinding: -<br>Sampling/allocation: CS<br>Treatment fidelity: +<br>Significance of primary outcome measure: -<br>Significance for st. outcome of interest: -<br>Precision: +<br>Intention to treat: N/A |
| Rodriguez et al., 2013  | 11;9;<br>M=4;<br>F=4 | 60.45(17.67)<br>18-79 | N/A                                             | Mod.-to-sev.                                            | 25.81<br>8-56 | <b>Type:</b> INT <b>Description:</b> Individual treatment involved both impairment-based and functional therapy. PWA and family members were involved in group treatment (i.e., share information about available local services, facilitate discussions about "living with aphasia" , promoting social interaction and multi-modal communication) Computer-based therapy (i.e., Bungalow, REACT, Speech Sounds on Cue) Challenge Task: specific goal each PWA wanted to achieve by the end of the program. <b>Intensity:</b> 5x/week, 240 minutes, 2 weeks OR 5x/week, 300 minutes, 4 weeks                                                                  | 41.60(15.50)<br>55.30(16.60)<br>13.70  | Level of Evidence: III/class IV<br>Study protocol: +<br>Blinding: +<br>Sampling/allocation: CS<br>Treatment fidelity: +<br>Significance of primary outcome measure: +<br>Significance for st. outcome of interest: +<br>Precision: +<br>Intention to treat: N/A |

|                                           |                          |                       |                                                                             |                                                              |                 |                                                                                                                                                                                                                                                                                                                                                                                                                                                                                                                                                                                                                                                                                                                             |                                       |                                                                                                                                                                                                                                                                 |
|-------------------------------------------|--------------------------|-----------------------|-----------------------------------------------------------------------------|--------------------------------------------------------------|-----------------|-----------------------------------------------------------------------------------------------------------------------------------------------------------------------------------------------------------------------------------------------------------------------------------------------------------------------------------------------------------------------------------------------------------------------------------------------------------------------------------------------------------------------------------------------------------------------------------------------------------------------------------------------------------------------------------------------------------------------------|---------------------------------------|-----------------------------------------------------------------------------------------------------------------------------------------------------------------------------------------------------------------------------------------------------------------|
| Rose, Attard, Mok, Lanyon, & Foster, 2013 | 11;10;<br>M= 5;<br>F = 5 | 59.30(10.37)<br>39-74 | Broca's = 5<br>Anomic = 4<br>Conduction = 1                                 | Mild - 1<br>Mild-to-Mod. - 2<br>Mod. - 3<br>Mod.-to-sev. - 4 | 46.21<br>7-88   | <b>Type:</b> A/P <b>Description:</b> PWA targeted word retrieval in small groups through treatment activities including (i.e., Go Fish, Memory, Request Role plays, Board games, rapid naming while playing snap, Who am I) In CIAT Plus: Verbal production was the goal but cueing was provided as needed (i.e., phonemic cue, written cue). In multi-modal aphasia therapy (M-MAT): Verbal production was also the goal but, multi-modal cueing was provided (i.e., gesture, drawing, written model, verbal model). All PWA received both treatments. <b>Intensity:</b> 4x/week, 195 min, 4 weeks                                                                                                                         | 53.00(22.13)<br>62.29(20.52)<br>9.29  | Level of Evidence: III/class IV<br>Study protocol: +<br>Blinding: -<br>Sampling/allocation: CS<br>Treatment fidelity: +<br>Significance of primary outcome measure: -<br>Significance for st. outcome of interest: +<br>Precision: +<br>Intention to treat: N/A |
| Sorin-Peters & Behrmann, 1995             | 3;3;<br>M=2;<br>F=1      | 69.33(3.06)<br>66-72  | Fluent =3                                                                   | Mild=1<br>Mild-to-Mod.=1<br>Mod.=1                           | 5<br>3-7        | <b>Type:</b> INT <b>Description:</b> Individual Therapy goals: Targeted the impaired process and taught PWA to compensate using non-verbal techniques with the overall goal of increasing PWAs' participation in the community and their conversational skills. Group Therapy goals: Gave PWA the opportunity to use compensatory strategies in a more a natural setting. Individual goals were incorporated into group discussion. PWA also participated in groups at the Day Treatment Center, which were led by nursing, recreational therapy, occupational therapy and social work personnel that were trained to use compensatory strategies with PWA. <b>Intensity:</b> 2x/week, 60 min, avg. 22.14 weeks (4-6.5 mos) | 72.00(13.45)<br>69.67(20.13)<br>-2.33 | Level of Evidence: III/class IV<br>Study protocol: +<br>Blinding: -<br>Sampling/allocation: CS<br>Treatment fidelity: -<br>Significance of primary outcome measure: -<br>Significance for st. outcome of interest: -<br>Precision: +<br>Intention to treat: N/A |
| Steele, Baird, McCall, & Haynes, 2014     | 9; 8;<br>M= 6;<br>F = 2  | 60.75(10.91)<br>43-77 | Broca's = 4<br>Conduction = 1<br>TCM = 1<br>Isolation = 1<br>Wernicke's = 1 | Mod.                                                         | 65.85<br>16-230 | <b>Type:</b> INT <b>Description:</b> Individual therapy (i.e., improving conversational skills using script training, sentence patterning and response elaboration), group therapy (i.e., word retrieval, improve speech intelligibility, train social exchanges, train longer and more complex sentences, increase conversational turns, improve well-being, increase life participation)and online language exercises (i.e., Talk Path: listening, speaking, reading and writing activities) <b>Intensity:</b> 2x/week, 60 min, 20.6 weeks                                                                                                                                                                                | 49.90(18.60)<br>67.70(13.60)<br>17.80 | Level of Evidence: III/class IV<br>Study protocol: +<br>Blinding: -<br>Sampling/allocation: CS<br>Treatment fidelity: +<br>Significance of primary outcome measure: +<br>Significance for st. outcome of interest: +<br>Precision: +<br>Intention to treat: N/A |

|                                   |                         |                       |                                                |                                                             |                |                                                                                                                                                                                                                                                                                                                                                                              |                                       |                                                                                                                                                                                                                                                                  |
|-----------------------------------|-------------------------|-----------------------|------------------------------------------------|-------------------------------------------------------------|----------------|------------------------------------------------------------------------------------------------------------------------------------------------------------------------------------------------------------------------------------------------------------------------------------------------------------------------------------------------------------------------------|---------------------------------------|------------------------------------------------------------------------------------------------------------------------------------------------------------------------------------------------------------------------------------------------------------------|
| van der Gaag et al., 2005         | 22; 14;<br>M=6;<br>F=16 | 58.00(13.40)<br>31-81 | N/A                                            | Mod.                                                        | Chronic<br>N/A | <b>Type:</b> INT <b>Description:</b> Group therapy (i.e., conversation, communication skills, art, discussion, self-advocacy, monitoring communication skills of conversation partners) <b>Intensity:</b> 1x/week, 120 min, 7 weeks                                                                                                                                          | 48.40(20.43)<br>58.10(19.85)<br>9.70  | Level of Evidence: IIB/class III<br>Study protocol: +<br>Blinding: +<br>Sampling/allocation: CS<br>Treatment fidelity: -<br>Significance of primary outcome measure: +<br>Significance for st. outcome of interest: +<br>Precision: +<br>Intention to treat: N/A |
| Wambaugh, Wright, & Nessler, 2012 | 6; 6;<br>M=4;<br>F=2    | 57.83(8.26)<br>46-70  | Nonfluent = 5<br>Fluent =1                     | Mild=1<br>Mild-to-Mod. = 3<br>Mod. = 2                      | 44.5<br>19-96  | <b>Type:</b> A/P <b>Description:</b> PWA received treatment in two picture <b>Description</b> contexts (i.e., "Tell me about the picture") and one personal recount context (i.e., "Tell me something about anything you would like to talk about.") <b>Intensity:</b> 2-3x/week, 6 weeks                                                                                    | 40.83(8.13)<br>48.33(10.46)<br>7.50   | Level of Evidence: III/class IV<br>Study protocol: +<br>Blinding: -<br>Sampling/allocation: CS<br>Treatment fidelity: +<br>Significance of primary outcome measure: -<br>Significance for st. outcome of interest: -<br>Precision: +<br>Intention to treat: N/A  |
| Wilson et al., 2012               | 9;8;<br>M= 7;<br>F=1    | 51.38(10.04)<br>28-62 | Anomic=5<br>TCM=1<br>Conduction=1<br>Broca's=1 | Mild-to-Mod. = 2<br>Mod. = 4<br>Mod.-to-sev. =1<br>Sev. = 1 | 17.16<br>6-36  | <b>Type:</b> INT <b>Description:</b> PWA participated in Intensive Residential Aphasia Communication Theraprogram (InteRACT Carey et al. 2006). Five hours of daily treatment included focus on speech and language skills, functional communication strategy usage, community re-integration and communication partner training. <b>Intensity:</b> 5x/week, 60 min, 4 weeks | 53.63(16.41)<br>65.25(18.13)<br>11.63 | Level of Evidence: IIA/class II<br>Study protocol: +<br>Blinding: -<br>Sampling/allocation: CS<br>Treatment fidelity: -<br>Significance of primary outcome measure: -<br>Significance for st. outcome of interest: -<br>Precision: +<br>Intention to treat: N/A  |

### Supplementary Material 6: Demographic information for within group studies using Boston Naming Test

Note: M=Male; F = Female; TCM = transcortical motor; TSM = transcortical sensory; sev. = severe; I = Impairment-based treatment; A/P = activity/participation-based treatment; INT = integrated treatment; st. = standardized; CS = convenience sample

| Study Name                        | Study N; N for outcome measure; Sex | Mean Age(SD) range    | Aphasia Type                                             | Aphasia Severity (WAB-AQ)        | Mean MPO range | Treatment(Tx)                                                                                                                                                                                                                                                                                                                                                                  | Pre-Tx M(SD)<br>Post-Tx M(SD)<br>Change Score | Methodological Rigor                                                                                                                                                                                                                                             |
|-----------------------------------|-------------------------------------|-----------------------|----------------------------------------------------------|----------------------------------|----------------|--------------------------------------------------------------------------------------------------------------------------------------------------------------------------------------------------------------------------------------------------------------------------------------------------------------------------------------------------------------------------------|-----------------------------------------------|------------------------------------------------------------------------------------------------------------------------------------------------------------------------------------------------------------------------------------------------------------------|
| Aftonomos, Steele, & Wertz, 1997  | 23;10;<br>M=7;<br>F=3               | 62.20(10.62)<br>49-77 | Anomic = 3<br>Wernicke's=2<br>Broca's=4<br>Conduction =1 | Mild = 3<br>Mod. = 5<br>Sev. = 2 | 40.8<br>9-80   | <b>Type:</b> INT: <b>Description:</b> Individual treatment to familiarize PWAs with their Lingraphica (LG) system and improve their performance in areas of weakness. Group treatment for 3 PWA involved PWAs using their LGs to respond to one another with a PACE treatment. PWA assigned exercises for home practice. <b>Intensity:</b> 1.96x/week, 60 min, avg. 14.1 weeks | 23.00(12.03)<br>34.10(16.70)<br>11.10         | Level of Evidence: IIB/class III<br>Study protocol: +<br>Blinding: -<br>Sampling/allocation: CS<br>Treatment fidelity: -<br>Significance of primary outcome measure: +<br>Significance for st. outcome of interest: +<br>Precision: +<br>Intention to treat: N/A |
| Babbitt, Worrall, & Cherney, 2015 | 74;74;<br>M = 52;<br>F = 22         | 54.10(16.30)<br>18-86 | Nonfluent = 49<br>Fluent = 25                            | Mod.                             | 15.5<br>3-87   | <b>Type:</b> INT Intensive Comprehensive Aphasia Program (ICAP): two individual therapy sessions and one session each of constraint-induced language therapy (CILT), reading/writing, computers and conversation group for six hours of daily programming. <b>Intensity:</b> 5x/week, 360 min, 4 weeks                                                                         | 16.60(19.00)<br>20.70(20.50)<br>4.10          | Level of Evidence: IIB/class III<br>Study protocol: +<br>Blinding: -<br>Sampling/allocation: CS<br>Treatment fidelity: +<br>Significance of primary outcome measure: +<br>Significance for st. outcome of interest: +<br>Precision: +<br>Intention to treat: N/A |

|                                            |                      |                       |                            |                                |                |                                                                                                                                                                                                                                                                                                                                                                                                                                                                                                                                                                                                                                                                                                                                                         |                                        |                                                                                                                                                                                                                                                                  |
|--------------------------------------------|----------------------|-----------------------|----------------------------|--------------------------------|----------------|---------------------------------------------------------------------------------------------------------------------------------------------------------------------------------------------------------------------------------------------------------------------------------------------------------------------------------------------------------------------------------------------------------------------------------------------------------------------------------------------------------------------------------------------------------------------------------------------------------------------------------------------------------------------------------------------------------------------------------------------------------|----------------------------------------|------------------------------------------------------------------------------------------------------------------------------------------------------------------------------------------------------------------------------------------------------------------|
| Breier, Maher, Novak, & Papanicolaou, 2006 | 6;6;<br>M=4;<br>F=2  | 61.33(8.80)<br>53-77  | Broca's=5<br>Conduction =1 | Above =2<br>Sev. =2<br>Mod. =1 | 47<br>21-70    | <b>Type:</b> A/P <b>Description:</b> Constraint Induced Language Therapy (CILT) = Only verbal expression was accepted and multi-modality communication was restricted, even self-cueing. Treatment was conducted in dyads and consisted of a dual card task with barrier present (i.e., PWA took turns requesting a card or responding another's request). Stimuli included four sets of cards of different semantic categories with two levels of difficulty (i.e., low- and high-frequency). Clinicians used shaping (i.e., increasing communicative demands of request/response from single words to lengthier sentences) and cueing for a successful production (i.e., semantic, phonemic, repetition). <b>Intensity:</b> 4x/week, 180 min, 3 weeks | 24.00(24.46)<br>23.00(24.54) -<br>1.00 | Level of Evidence: IIB/class III<br>Study protocol: +<br>Blinding: -<br>Sampling/allocation: CS<br>Treatment fidelity: +<br>Significance of primary outcome measure: +<br>Significance for st. outcome of interest: -<br>Precision: +<br>Intention to treat: N/A |
| Edmonds & Kiran, 2006                      | 3 ;3;<br>M=1;<br>F=2 | 54.00(1.73)<br>53-56  | n/a                        | Mild=1<br>Mod. =1<br>Sev. =1   | 8.66<br>8-9    | <b>Type:</b> I <b>Description:</b> Semantic feature analysis-based (SFA-based) treatment (Boyle & Coelho, 1995 Kiran & Thompson, 2003) involving the following steps: 1) initial naming attempt 2) written feature verification 3) yes/no feature questions 4) second naming attempt. Treatment was administered in both languages. <b>Intensity:</b> 2x/week, 120 min 7-34 weeks                                                                                                                                                                                                                                                                                                                                                                       | 22.23(20.02)<br>38.87(8.21)<br>16.63   | Level of Evidence: III/class IV<br>Study protocol: +<br>Blinding: -<br>Sampling/allocation: CS<br>Treatment fidelity: +<br>Significance of primary outcome measure: +<br>Significance for st. outcome of interest: +<br>Precision: +<br>Intention to treat: N/A  |
| Edmonds, Nadeau, & Kiran, 2009             | 4; 4;<br>M=1;<br>F=3 | 61.50(10.08)<br>52-75 | TMA=2<br>Conduction=2      | Mild= 2<br>Mod.= 2             | 37.25<br>10-96 | <b>Type:</b> I <b>Description:</b> Verb Network Strengthening Treatment (VNeST): 1) PWA were given a verb. 2) Asked to produce 3-4 thematic role pairs. 3) Picked a thematic role pair and answered wh-questions about it. <b>Intensity:</b> 2x/week, 120 min, avg. 4.75 weeks (4-6 weeks)                                                                                                                                                                                                                                                                                                                                                                                                                                                              | 36.50(11.24)<br>44.50(9.40)<br>8.00    | Level of Evidence: III/class IV<br>Study protocol: +<br>Blinding: -<br>Sampling/allocation: CS<br>Treatment fidelity: +<br>Significance of primary outcome measure: -<br>Significance for st. outcome of interest: -<br>Precision: +<br>Intention to treat: N/A  |

|                                                              |                      |                       |                                      |                                   |                 |                                                                                                                                                                                                                                                                                                                                                                                                                                                                                                                                                                                                                                                                                                                                                                                                                                                                                                                                                               |                                      |                                                                                                                                                                                                                                                                 |
|--------------------------------------------------------------|----------------------|-----------------------|--------------------------------------|-----------------------------------|-----------------|---------------------------------------------------------------------------------------------------------------------------------------------------------------------------------------------------------------------------------------------------------------------------------------------------------------------------------------------------------------------------------------------------------------------------------------------------------------------------------------------------------------------------------------------------------------------------------------------------------------------------------------------------------------------------------------------------------------------------------------------------------------------------------------------------------------------------------------------------------------------------------------------------------------------------------------------------------------|--------------------------------------|-----------------------------------------------------------------------------------------------------------------------------------------------------------------------------------------------------------------------------------------------------------------|
| Falconer & Antonucci, 2012                                   | 4; 4;<br>M=3;<br>F=1 | 45.75(15.09)<br>31-62 | Conduction=2<br>Broca's=1<br>TCM=1   | Mod.=1<br>Sev.=3                  | 86.99<br>24-156 | <b>Type:</b> INT <b>Description:</b> Modified Promoting Aphasics' Communication Effectiveness (PACE) approach: Within a small group, PWA took turns describing stimuli hidden from others with enough detail for others to guess the item) When word-retrieval difficulty occurred, the activity was briefly discontinued while PWA were led through the SFA chart (Boyle,2004) until they accessed the target. HW assignments included describing difficult-to-name pictured objects using SFA outside of treatment sessions. <b>Intensity:</b> 2x/week, 90-120 min, 7 weeks                                                                                                                                                                                                                                                                                                                                                                                 | 9.00(8.29)<br>11.75(10.90)<br>2.75   | Level of Evidence: III/class IV<br>Study protocol: +<br>Blinding: -<br>Sampling/allocation: CS<br>Treatment fidelity: -<br>Significance of primary outcome measure: -<br>Significance for st. outcome of interest: -<br>Precision: +<br>Intention to treat: N/A |
| Ferguson, Evans, & Raymer, 2012                              | 4;4;<br>M=2;<br>F=2  | 57.75(14.20)<br>40-74 | Broca's=2<br>Conduction = 1<br>TCM=1 | Above = 1<br>Mild = 1<br>Sev. = 2 | 34.75<br>22-41  | <b>Type:</b> I <b>Description:</b> Intention Gesture Treatment (IGT): 1) Participants generated L-hand gesture and pressed button to view target noun then, attempted to name. 2) If they were inaccurate, the SLP modeled the gesture and noun together and participant imitated 4-6 times. 3) SLP modeled again and PWA rehearsed gesture and verbal production 4-6 times. 4) PWA re-attempted to produce the target noun after producing gesture and pressing the red button. Pantomime Gesture treatment (PGT)) 1) PWA were trained to produced pantomime gestures. 2) SLP pushed button to change picture, then PWA attempted to name. 3) If they were inaccurate, SLP produced gesture and verbal model of target and PWA imitated 4-6x. 4) SLP modeled again and participant practiced the gesture and verbal target again. 5) They re-attempted production of the target after SLP pressed button. <b>Intensity:</b> 2-3x/week, 45-60 min, 9-11 weeks | 26.75(25.18)<br>29.50(27.09)<br>2.75 | Level of Evidence: III/class IV<br>Study protocol: +<br>Blinding: -<br>Sampling/allocation: CS<br>Treatment fidelity: -<br>Significance of primary outcome measure: -<br>Significance for st. outcome of interest: -<br>Precision: +<br>Intention to treat: N/A |
| Fridriksson, Morrow-Odom, Moser, Fridriksson, & Baylis, 2006 | 3 ;3;<br>M=3         | 59.00(10.82)<br>47-68 | Broca's = 2<br>Anomic = 1            | Mild = 1<br>Sev. = 2              | 60<br>24-144    | <b>Type:</b> I <b>Description:</b> A combination of spaced retrieval, errorless learning and massed practice techniques were used to treat naming. Target items were selected by participants. Treatment was administered in a group setting. PWA and clinicians played board games and took turns working on naming in between turns in the game. <b>Intensity:</b> 7x/week, 240 min, 2 weeks                                                                                                                                                                                                                                                                                                                                                                                                                                                                                                                                                                | 13.67(22.81)<br>14.33(21.39)<br>.67  | Level of Evidence: III/class IV<br>Study protocol: +<br>Blinding: -<br>Sampling/allocation: CS<br>Treatment fidelity: -<br>Significance of primary outcome measure: -<br>Significance for st. outcome of interest: -<br>Precision: +<br>Intention to treat: N/A |

|                                                        |                          |                       |                                                                        |                            |                 |                                                                                                                                                                                                                                                                                                                                                                                                                                                           |                                      |                                                                                                                                                                                                                                                                 |
|--------------------------------------------------------|--------------------------|-----------------------|------------------------------------------------------------------------|----------------------------|-----------------|-----------------------------------------------------------------------------------------------------------------------------------------------------------------------------------------------------------------------------------------------------------------------------------------------------------------------------------------------------------------------------------------------------------------------------------------------------------|--------------------------------------|-----------------------------------------------------------------------------------------------------------------------------------------------------------------------------------------------------------------------------------------------------------------|
| Kendall et al., 2008                                   | 10;10;<br>M=6;<br>F=4    | 52.40(11.40)<br>40-76 |                                                                        | Mild=6<br>Mod.=1<br>Sev.=3 | 59.7<br>16-120  | <b>Type: I Description:</b> Phonologically-based treatment: 1)Trains subjects on individual phonemes and 2) Trains phonological and orthographic sequence knowledge at the syllable level. <b>Intensity:</b> 4x/week, 120 min, 12 weeks                                                                                                                                                                                                                   | 30.10(13.47)<br>33.70(12.61)<br>3.60 | Level of Evidence: III/class IV<br>Study protocol: +<br>Blinding: -<br>Sampling/allocation: CS<br>Treatment fidelity: +<br>Significance of primary outcome measure: -<br>Significance for st. outcome of interest: +<br>Precision: +<br>Intention to treat: N/A |
| Kendall, Raymer, Rose, Gilbert, & Gonzalez Rothi, 2014 | 8;8;<br>M=4;<br>F=4      | 62.00(9.65)<br>46-72  | Mild = 6<br>Mod. = 1 Severe = 1                                        |                            | 63.13<br>11-120 | <b>Type I Description:</b> Naming pictures with semantic, phonologic, repetition and orthographic cueing hierarchy including a delayed-recall step. <b>Intensity:</b> 5x/week, 120 min, 6 weeks                                                                                                                                                                                                                                                           | 30.63(12.72)<br>30.75(14.05)<br>.13  | Level of Evidence: III/class IV<br>Study protocol: +<br>Blinding: +<br>Sampling/allocation: CS<br>Treatment fidelity: -<br>Significance of primary outcome measure: -<br>Significance for st. outcome of interest: +<br>Precision: +<br>Intention to treat: N/A |
| Kendall, Oelke, Brookshire, & Nadeau, 2015             | 26 ;26;<br>M=15;<br>F=11 | 56.04(14.53)<br>26-78 | No aphasia=5<br>Mild=6<br>Mild-to-Mod.=9<br>Mod.=5<br>Mod.-to-severe=1 |                            | 47.5<br>8-211   | <b>Type: I Description:</b> Multimodal, phonologically-based therapy using phonemes in isolation and one-, two-, and three-syllable sequences in real words and nonword combinations. More specifically, Stage 1) targeted sounds in isolation and Stage 2) targeted sounds in syllables. Each stage involves an overview, introduction of sounds and sound sequences, perception tasks and production tasks. <b>Intensity:</b> 5x/week, 120 min, 6 weeks | 34.34(18.11)<br>37.61(16.17)<br>3.27 | Level of Evidence: III/class IV<br>Study protocol: +<br>Blinding: -<br>Sampling/allocation: CS<br>Treatment fidelity: +<br>Significance of primary outcome measure: +<br>Significance for st. outcome of interest: +<br>Precision: +<br>Intention to treat: N/A |

|                        |                      |                       |                                      |                                  |               |                                                                                                                                                                                                                                                                                                                                             |                                      |                                                                                                                                                                                                                                                                 |
|------------------------|----------------------|-----------------------|--------------------------------------|----------------------------------|---------------|---------------------------------------------------------------------------------------------------------------------------------------------------------------------------------------------------------------------------------------------------------------------------------------------------------------------------------------------|--------------------------------------|-----------------------------------------------------------------------------------------------------------------------------------------------------------------------------------------------------------------------------------------------------------------|
| Kiran & Thompson, 2003 | 4;4<br>F=3;<br>M=1   | 68.50(5.92)<br>63-75  | Fluent =4                            | Sev. = 4                         | 33.75<br>9-99 | <b>Type: I Description:</b> Typicality-based SFA treatment involving 1) Naming 2) Category Sorting 3) Feature Verification 4) Answering yes/no questions <b>Intensity:</b> 2x/week, 120 min, 17-35 weeks                                                                                                                                    | 6.45(2.34)<br>13.76(6.99)<br>7.31    | Level of Evidence: III/class IV<br>Study protocol: +<br>Blinding: -<br>Sampling/allocation: CS<br>Treatment fidelity: -<br>Significance of primary outcome measure: -<br>Significance for st. outcome of interest: -<br>Precision: +<br>Intention to treat: N/A |
| Kiran, 2005            | 3;3;<br>M=3          | 63.67(4.16)<br>59-67  | TCM =1<br>Broca's = 1:<br>Anomic = 1 | Mild = 1<br>Mod. = 1<br>Sev. = 1 | 156<br>24-288 | <b>Type: I Description:</b> Phoneme-to-grapheme conversion: 1) writing to dictation of the word 2) copying the word 3) oral reading of the word 4) selecting and writing the sounds of the target 5) writing phonemes of the target word presented aloud 6) writing to dictation of the word <b>Intensity:</b> 2x/week, 120 min, 5-10 weeks | 23.02(16.52)<br>28.00(12.51)<br>4.98 | Level of Evidence: III/class IV<br>Study protocol: +<br>Blinding: -<br>Sampling/allocation: CS<br>Treatment fidelity: +<br>Significance of primary outcome measure: +<br>Significance for st. outcome of interest: -<br>Precision: +<br>Intention to treat: N/A |
| Kiran & Johnson, 2008  | 3 ;3;<br>M=2;<br>F=1 | 62.33(11.15)<br>54-75 | Anomic=3                             | Mild =1<br>Mod. =1<br>Sev. =1    | 18<br>7-36    | <b>Type: I Description:</b> Typicality-based SFA treatment 1) Naming the picture 2) sorting pictures of target category 3) selecting written features for the target 4) answering written yes/no questions 5) naming the picture <b>Intensity:</b> 2x/week, 120 min, 8-15 weeks                                                             | 32.54(16.29)<br>41.54(7.05)<br>9.00  | Level of Evidence: III/class IV<br>Study protocol: -<br>Blinding: -<br>Sampling/allocation: CS<br>Treatment fidelity: +<br>Significance of primary outcome measure: +<br>Significance for st. outcome of interest: -<br>Precision: +<br>Intention to treat: N/A |



|                                    |                       |                       |                            |                            |                |                                                                                                                                                                                                                                        |                                      |                                                                                                                                                                                                                                                                 |
|------------------------------------|-----------------------|-----------------------|----------------------------|----------------------------|----------------|----------------------------------------------------------------------------------------------------------------------------------------------------------------------------------------------------------------------------------------|--------------------------------------|-----------------------------------------------------------------------------------------------------------------------------------------------------------------------------------------------------------------------------------------------------------------|
| Kiran, 2008                        | 5;5;<br>M=1;<br>F=4   | 58.40(12.03)<br>47-77 | Conduction =3<br>Broca's=2 | Mod.=2<br>Sev.=3           | 8.2<br>7-10    | <b>Type: I Description:</b> SFA-based treatment involved 1) naming the picture 2) sorting pictures by category 3) identify semantic features 4) answer yes/no feature questions <b>Intensity:</b> 2x/week, 120 min, 24 weeks           | 14.00(9.06)<br>27.00(13.56)<br>13.00 | Level of Evidence: III/class IV<br>Study protocol: +<br>Blinding: -<br>Sampling/allocation: CS<br>Treatment fidelity: +<br>Significance of primary outcome measure: -<br>Significance for st. outcome of interest: -<br>Precision: +<br>Intention to treat: N/A |
| Kiran, Sandberg, & Abbott, 2009    | 4 ; 4;<br>M=2;<br>F=2 | 56.75(15.63)<br>39-77 | Anomic=4                   | Mild=3<br>Sev. =1          | 25.5<br>8-43   | <b>Type: I Description:</b> SFA-based treatment involving: 1) category sorting 2) feature selection 3) yes/no feature questions 4) word recall and 5) free generative naming. <b>Intensity:</b> 2x/week, 120 min, avg. 12 weeks (6-19) | 36.51(15.48)<br>37.50(11.62)<br>.99  | Level of Evidence: III/class IV<br>Study protocol: +<br>Blinding: -<br>Sampling/allocation: CS<br>Treatment fidelity: +<br>Significance of primary outcome measure: -<br>Significance for st. outcome of interest: -<br>Precision: +<br>Intention to treat: N/A |
| Kiran, Sandberg, & Sebastian, 2011 | 6 ;6;<br>M=3;<br>F=3  | 68.00(15.76)<br>39-84 | Anomic=4<br>Conduction=2   | Mild=2<br>Mod.=1<br>Sev.=3 | 43.16<br>6-108 | <b>Type: I Description:</b> SFA-based treatment involving 1) category generation 2) category sorting 3) feature generation and/or selection and 4) answering yes/no feature questions <b>Intensity:</b> 2x/week, 120 min, 10 weeks     | 23.50(12.21)<br>24.16(13.02)<br>.66  | Level of Evidence: III/class IV<br>Study protocol: +<br>Blinding: -<br>Sampling/allocation: CS<br>Treatment fidelity: +<br>Significance of primary outcome measure: -<br>Significance for st. outcome of interest: -<br>Precision: +<br>Intention to treat: N/A |

|                                                             |                         |                       |                                                       |                      |                 |                                                                                                                                                                                                                                                                                                                                                                                                                                                                                                                                                            |                                       |                                                                                                                                                                                                                                                                  |
|-------------------------------------------------------------|-------------------------|-----------------------|-------------------------------------------------------|----------------------|-----------------|------------------------------------------------------------------------------------------------------------------------------------------------------------------------------------------------------------------------------------------------------------------------------------------------------------------------------------------------------------------------------------------------------------------------------------------------------------------------------------------------------------------------------------------------------------|---------------------------------------|------------------------------------------------------------------------------------------------------------------------------------------------------------------------------------------------------------------------------------------------------------------|
| Kurland, Wilkins, & Stokes, 2014                            | 8;5;<br>M=2;<br>F=3     | 67.60(8.26)<br>58-80  | Anomia = 3<br>Transcortical sensory =1<br>Wernicke =1 | Mild = 4<br>Mod. = 1 | 44<br>17-84     | <b>Type:</b> INT <b>Description:</b> Home practice implemented after two weeks of intensive language therapy (ILAT) or modified version of Promoting Aphasic Communicative Effectiveness (PACE). Each participant received two individualized iBook (i.e., objects and actions) to practice at home. Daily practice involved 20 words. Each word had a chapter with five interactive pages in the iBook targeting it. They also met with the SLP once weekly for informal conversation and trouble-shooting. <b>Intensity:</b> 5-6x/week, 20 min, 26 weeks | 39.60(10.24)<br>37.40(11.72)<br>-2.20 | Level of Evidence: IIB/class III<br>Study protocol: +<br>Blinding: -<br>Sampling/allocation: CS<br>Treatment fidelity: +<br>Significance of primary outcome measure: -<br>Significance for st. outcome of interest: -<br>Precision: +<br>Intention to treat: N/A |
| Lacey, Lott, Snider, Sperling, & Friedman, 2010             | 6; 3;<br>F=3            | 56.00(15.39)<br>39-69 | Anomic = 3                                            | Mild = 1<br>Mod. = 2 | 54.33<br>13-114 | <b>Type:</b> I <b>Description:</b> Multiple Oral Re-reading Treatment: 1) Read text passages three times aloud 2) Re-read words on which they made mistakes. Clinician read the word aloud for them if they could not. PWA re-read the whole sentence if they made so many errors that the sentence flow was disrupted. They were instructed to call the SLP daily and read the passage aloud over the phone. They also read it 5 times at home daily without assistance. <b>Intensity:</b> 1x/week, 60 min, 8 weeks                                       | 26.33(7.51)<br>33.67(3.79)<br>7.33    | Level of Evidence: III/class IV<br>Study protocol: +<br>Blinding: -<br>Sampling/allocation: CS<br>Treatment fidelity: -<br>Significance of primary outcome measure: +<br>Significance for st. outcome of interest: +<br>Precision: +<br>Intention to treat: N/A  |
| MacGregor, Difrancesco, Pulvermüller, Shtyrov, & Mohr, 2015 | 12;12;<br>M=9;<br>F = 3 | 57.00(15.64)<br>26-76 | Non-fluent                                            | Mod.                 | 81.58<br>17-234 | <b>Type:</b> A/P <b>Description:</b> Intensive Language Action Therapy (ILAT): Treatment involved language games (i.e., making requests) to improve their language and communication. Treatment stimuli included cards depicting scenes/objects. Verbal expression was encouraged and non-verbal communication was discouraged. <b>Intensity:</b> 1x/day, 180-240 min, 10 days                                                                                                                                                                             | 28.58(4.86)<br>33.00(4.22)<br>4.42    | Level of Evidence: IIB/class III<br>Study protocol: +<br>Blinding: -<br>Sampling/allocation: CS<br>Treatment fidelity: -<br>Significance of primary outcome measure: +<br>Significance for st. outcome of interest: +<br>Precision: +<br>Intention to treat: N/A |

|                                                             |                        |                       |                                            |                                  |              |                                                                                                                                                                                                                                                                                                                                                                                  |                                      |                                                                                                                                                                                                                                                                  |
|-------------------------------------------------------------|------------------------|-----------------------|--------------------------------------------|----------------------------------|--------------|----------------------------------------------------------------------------------------------------------------------------------------------------------------------------------------------------------------------------------------------------------------------------------------------------------------------------------------------------------------------------------|--------------------------------------|------------------------------------------------------------------------------------------------------------------------------------------------------------------------------------------------------------------------------------------------------------------|
| Milman, Clendenen, & Vega-Mendoza, 2014                     | 3;3;<br>M=3            | N/A(N/A)<br>56-68     | Broca's = 3                                | Sev.                             | 12-84        | <b>Type:</b> INT <b>Description:</b> Functional use of adjectives to describe people in four different tasks: 1) single-word adjective production 2) single-word pronoun production 3) sentence training and 4) discourse production. Semantic, orthographic and phonemic cues were given to facilitate single word use. <b>Intensity:</b> 4x/week, 60 min, avg. 11 weeks (6-18) | 16.33(11.37)<br>22.67(8.50)<br>6.33  | Level of Evidence: III/class IV<br>Study protocol: +<br>Blinding: -<br>Sampling/allocation: CS<br>Treatment fidelity: +<br>Significance of primary outcome measure: -<br>Significance for st. outcome of interest: -<br>Precision: +<br>Intention to treat: N/A  |
| Mohr, Diffrancesco, Harrington, Evans, & Pulvermüller, 2014 | 8; 8;<br>M=7;<br>F = 1 | 62.38(12.75)<br>41-76 | Nonfluent                                  | Mild = 3<br>Mod. = 1<br>Sev. = 4 | 87<br>17-234 | <b>Type:</b> A/P <b>Description:</b> Intensive Language Action Therapy (ILAT): Treatment involved language games (i.e., making requests) to improve their language and communication. Treatment stimuli included cards depicting scenes/objects. Verbal expression was encouraged and non-verbal communication was discouraged. <b>Intensity:</b> 1x/day, 180 min, 10 days       | 25.38(16.69)<br>29.75(13.31)<br>4.38 | Level of Evidence: IIB/class III<br>Study protocol: -<br>Blinding: -<br>Sampling/allocation: CS<br>Treatment fidelity: -<br>Significance of primary outcome measure: +<br>Significance for st. outcome of interest: +<br>Precision: +<br>Intention to treat: N/A |
| Nettleton & Lesser, 1991                                    | 6; 6;<br>F=4;<br>M=2   | 64.83(7.83)<br>55-74  | Fluent = 4<br>Anomic = 1<br>Non-fluent = 1 | Mod. = 1<br>Sev. = 5             | 47<br>6-96   | <b>Type:</b> I <b>Description:</b> Semantic therapy involved word-picture matching, yes/no feature judgments and category sorting. Phonological therapy involved repetition of picture name, rhyme judgment and naming with progressive phonemic cues. <b>Intensity:</b> 2x/week, 60 min, 8 weeks                                                                                | 12.20(6.84)<br>14.50(6.26)<br>2.30   | Level of Evidence: III/class IV<br>Study protocol: +<br>Blinding: -<br>Sampling/allocation: CS<br>Treatment fidelity: -<br>Significance of primary outcome measure: +<br>Significance for st. outcome of interest: +<br>Precision: +<br>Intention to treat: N/A  |

|                                   |                        |                       |                                                 |                      |               |                                                                                                                                                                                                                                                                                                                                                                                                                                                                                |                                      |                                                                                                                                                                                                                                                                 |
|-----------------------------------|------------------------|-----------------------|-------------------------------------------------|----------------------|---------------|--------------------------------------------------------------------------------------------------------------------------------------------------------------------------------------------------------------------------------------------------------------------------------------------------------------------------------------------------------------------------------------------------------------------------------------------------------------------------------|--------------------------------------|-----------------------------------------------------------------------------------------------------------------------------------------------------------------------------------------------------------------------------------------------------------------|
| Nickels & Osborne, 2016           | 4; 4;<br>M= 3;<br>F= 1 | 59.75(18.66)<br>34-74 | Global= 2<br>Anomic= 1<br>TCS= 1                | Mod. = 3<br>Sev. = 1 | 25.8<br>15-42 | <b>Type:</b> A/P <b>Description:</b> Constraint Induced Aphasia Therapy Plus (CIAT-plus): Therapy addressed verbal expression through Go Fish. 1) Volunteer played the game with two PWA. 2) PWA chose a card and asked the other players for a card. 3) Co-player then responded. PWA could use multi-modal communication, as needed. Shaping was included to increase the complexity of their verbal responses. <b>Intensity:</b> 2x/week, 90 min, 4 weeks                   | 23.25(6.99)<br>25.25(8.18)<br>2.00   | Level of Evidence: III/class IV<br>Study protocol: +<br>Blinding: -<br>Sampling/allocation: CS<br>Treatment fidelity: +<br>Significance of primary outcome measure: +<br>Significance for st. outcome of interest: +<br>Precision: +<br>Intention to treat: N/A |
| Raymer, Kohen, & Saffell, 2006a   | 5; 4;<br>M=2;<br>F=3   | 70.80(12.11)<br>51-82 | Broca's=2<br>Conduction = 2<br>Mixed = 1        | Mod. = 1<br>Sev. = 4 | 18.4<br>4-42  | <b>Type:</b> I <b>Description:</b> MossTalk Words (i.e., computer-assisted treatment program). PWA completed multi-modal matching exercises involving 1) spoken plus written word to picture matching 2) spoken word to picture matching 3) written word to picture matching <b>Intensity:</b> 1-2x/week, 60 min, 6-12 weeks, then, 3-4x/week, 60 min 3-4 weeks. 4 week break in between each 12-hour tx. phase.                                                               | 6.80(9.98)<br>7.80(7.92)<br>1.00     | Level of Evidence: III/class IV<br>Study protocol: +<br>Blinding: -<br>Sampling/allocation: CS<br>Treatment fidelity: -<br>Significance of primary outcome measure: +<br>Significance for st. outcome of interest: -<br>Precision: +<br>Intention to treat: N/A |
| Raymer, Singletary, et al., 2006b | 9; 9;<br>M=6;<br>F=3   | 60.67(9.08)<br>49-70  | Broca's = 6<br>Wernicke's = 2<br>Conduction = 1 | Mod. = 3<br>Sev. = 6 | 29<br>5-62    | <b>Type:</b> I <b>Description:</b> Gesture-Verbal Treatment (GVT): 1) SLP showed the picture and modeled the target word and a gesture. 2) PWA produced word and gesture three times 3) SLP showed gesture in isolation and participant imitated three times 4) SLP presented the target and PWA repeated it three times 4) After a 5-second delay, SLP prompted participant to show and tell them what happened in the picture. <b>Intensity:</b> 3-4x/week, 60 min, 10 weeks | 11.33(11.31)<br>12.55(14.11)<br>1.22 | Level of Evidence: III/class IV<br>Study protocol: +<br>Blinding: -<br>Sampling/allocation: CS<br>Treatment fidelity: -<br>Significance of primary outcome measure: +<br>Significance for st. outcome of interest: +<br>Precision: +<br>Intention to treat: N/A |

|                                       |                       |                       |                                                     |                      |                 |                                                                                                                                                                                                                                                                                                                                                                                                                                                                                                                                                                                                                                                                                                                                                                                                                  |                                      |                                                                                                                                                                                                                                                                 |
|---------------------------------------|-----------------------|-----------------------|-----------------------------------------------------|----------------------|-----------------|------------------------------------------------------------------------------------------------------------------------------------------------------------------------------------------------------------------------------------------------------------------------------------------------------------------------------------------------------------------------------------------------------------------------------------------------------------------------------------------------------------------------------------------------------------------------------------------------------------------------------------------------------------------------------------------------------------------------------------------------------------------------------------------------------------------|--------------------------------------|-----------------------------------------------------------------------------------------------------------------------------------------------------------------------------------------------------------------------------------------------------------------|
| Raymer et al., 2012                   | 8;8;<br>M= 4;<br>F= 4 | 58.13(14.30)<br>40-79 | Broca's = 4<br>TMA = 2<br>TSA = 1<br>Wernicke's = 1 | Mod.= 4<br>Sev. = 4  | 13.5<br>5-30    | <b>Type: I Description:</b> Errorless Naming: 1) SLP modelled the picture name and PWA repeated 2)SLP showed the written word and PWA read it aloud three times 3)Written word was removed and PWA was given 5 seconds to hold onto it 4) SLP prompted PWA to name it again. Gestural Facilitation: 1) SLP modelled the name and a related gesture 2) SLP modelled the gesture alone for SLP to imitate three times 3) SLP modelled name and PWA repeated three times 4) Clinician modelled gesture while showing the picture 5) After 5 second delay SLP prompted PWA to provide name and gesture again. <b>Intensity:</b> 2-3x/week, 60 min, 10 weeks                                                                                                                                                          | 14.63(8.31)<br>14.50(6.78)<br>-13    | Level of Evidence: III/class IV<br>Study protocol: +<br>Blinding: -<br>Sampling/allocation: CS<br>Treatment fidelity: +<br>Significance of primary outcome measure: -<br>Significance for st. outcome of interest: -<br>Precision: +<br>Intention to treat: N/A |
| Rider, Wright, Marshall, & Page, 2008 | 3; 3;<br>M=2;<br>F=1  | 63.33(9.07)<br>55-73  | Nonfluent =3                                        | Mild = 1<br>Mod. = 2 | 65.67<br>26-126 | <b>Type: I Description:</b> Trained words related to 6-8 contexts (i.e., story retell and procedural narratives) using SFA (e.g., Boyle, 2004 Boyle & Coelho, 1995) <b>Intensity:</b> 2-3x/week, 60 min, 7-14 weeks                                                                                                                                                                                                                                                                                                                                                                                                                                                                                                                                                                                              | 30.33(11.06)<br>34.00(10.15)<br>3.67 | Level of Evidence: III/class IV<br>Study protocol: +<br>Blinding: -<br>Sampling/allocation: CS<br>Treatment fidelity: +<br>Significance of primary outcome measure: +<br>Significance for st. outcome of interest: +<br>Precision: +<br>Intention to treat: N/A |
| Rodriguez, Raymer, & Rothi, 2006      | 4 ;4;<br>M=3;<br>F=1  | 65.00(9.76)<br>52-73  | Conduction = 2<br>Wernicke's = 1<br>Broca's =1      | Mild =1<br>Sev. =3   | 34.25<br>8-96   | <b>Type: I Description:</b> All PWA received both verb naming treatments. Gesture-Verbal Treatment (GVT): 1) SLP showed the picture and modeled the target word and a gesture. 2) PWA produced word and gesture three times 3) SLP showed gesture in isolation and PWA imitated three times 4) SLP presented the target and PWA repeated it three times 4) After a 5-second delay, SLP prompted participant to show and tell them what happened in the target picture. Semantic-Phonologic Treatment: 1) SLP showed PWA the picture and modeled the target word 2) PWA answered semantic and phonologic questions about the target 3) PWA produced the target three times 4) After a 5-second delay, PWA attempted to explain what was happening in the picture. <b>Intensity:</b> 2-3/week, 60 min, 10-14 weeks | 12.50(19.00)<br>14.75(23.08)<br>2.25 | Level of Evidence: III/class IV<br>Study protocol: +<br>Blinding: -<br>Sampling/allocation: CS<br>Treatment fidelity: -<br>Significance of primary outcome measure: -<br>Significance for st. outcome of interest: -<br>Precision: +<br>Intention to treat: N/A |

|                                           |                          |                       |                                                  |                                              |               |                                                                                                                                                                                                                                                                                                                                                                                                                                                                                                                                                                                                     |                                      |                                                                                                                                                                                                                                                                  |
|-------------------------------------------|--------------------------|-----------------------|--------------------------------------------------|----------------------------------------------|---------------|-----------------------------------------------------------------------------------------------------------------------------------------------------------------------------------------------------------------------------------------------------------------------------------------------------------------------------------------------------------------------------------------------------------------------------------------------------------------------------------------------------------------------------------------------------------------------------------------------------|--------------------------------------|------------------------------------------------------------------------------------------------------------------------------------------------------------------------------------------------------------------------------------------------------------------|
| Rodriguez et al., 2013                    | 11;11;<br>M=4;<br>F=4    | 60.45(17.67)<br>18-79 | N/A                                              | Mod.                                         | 25.81<br>8-56 | <b>Type:</b> INT <b>Description:</b> Individual treatment involved both impairment-based and functional therapy. PWA and family members were involved in group treatment (i.e., share information about available local services, facilitate discussions about "living with aphasia" promoting social interaction and multi-modal communication) Computer-based therapy (i.e., Bungalow, REACT, Speech Sounds on Cue) Challenge Task: specific goal each PWA wanted to achieve by the end of the program. <b>Intensity:</b> 5x/week, 240 min, 2 weeks OR 5x/week, 300 min, 4 weeks                  | 20.10(19.10)<br>22.50(21.30)<br>2.40 | Level of Evidence: IIB/class III<br>Study protocol: +<br>Blinding: +<br>Sampling/allocation: CS<br>Treatment fidelity: +<br>Significance of primary outcome measure: +<br>Significance for st. outcome of interest: +<br>Precision: +<br>Intention to treat: N/A |
| Rose, Attard, Mok, Lanyon, & Foster, 2013 | 11;11;<br>M= 6;<br>F = 5 | 58.09(10.63)<br>39-74 | Broca's = 6<br>Anomic = 4,<br>Conduction = 1     | Above =1<br>Mild = 1<br>Mod. = 4<br>Sev. = 5 | 44<br>17-88   | <b>Type:</b> A/P <b>Description:</b> PWA targeted word retrieval in small groups through treatment activities including (i.e., Go Fish, Memory, Request Role plays, Board games, rapid naming while playing snap, Who am I) In CIAT Plus: Verbal production was the goal but cueing was provided as needed (i.e., phonemic cue, written cue). In multi-modal aphasia therapy (M-MAT): Verbal production was also the goal but, multi-modal cueing was provided (i.e., gesture, drawing, written model, verbal model). All PWA received both treatments. <b>Intensity:</b> 4x/week, 195 min, 4 weeks | 20.18(16.28)<br>27.64(18.92)<br>7.45 | Level of Evidence: III/class IV<br>Study protocol: +<br>Blinding: -<br>Sampling/allocation: CS<br>Treatment fidelity: +<br>Significance of primary outcome measure: -<br>Significance for st. outcome of interest: +<br>Precision: +<br>Intention to treat: N/A  |
| Sandberg, Bohland, & Kiran, 2015          | 10; 10;<br>M=7;<br>F=3   | 59.40(10.01)<br>47-75 | Anomic=6 2<br>Conduction=2<br>Broca's=1<br>TCM=1 | Above =6<br>Mild= 3<br>Mod.=1                | 55.7<br>7-134 | <b>Type:</b> I <b>Description:</b> PWA were trained on ten abstract words in a particular context category (e.g., courthouse) and ten untrained concrete words from the same context-category were monitored to measure generalization. Treatment steps included 1) Feature selection 2) Abstract/concrete lexical decision 3) Synonym generation <b>Intensity:</b> 2x/week, 120 min, 10 weeks                                                                                                                                                                                                      | 47.34(13.40)<br>49.80(13.57)<br>2.46 | Level of Evidence: III/class IV<br>Study protocol: +<br>Blinding: -<br>Sampling/allocation: CS<br>Treatment fidelity: -<br>Significance of primary outcome measure: -<br>Significance for st. outcome of interest: -<br>Precision: +<br>Intention to treat: N/A  |

|                                                |                      |                      |                          |                                   |                 |                                                                                                                                                                                                                                                                                                                                                                                                        |                                      |                                                                                                                                                                                                                                                                  |
|------------------------------------------------|----------------------|----------------------|--------------------------|-----------------------------------|-----------------|--------------------------------------------------------------------------------------------------------------------------------------------------------------------------------------------------------------------------------------------------------------------------------------------------------------------------------------------------------------------------------------------------------|--------------------------------------|------------------------------------------------------------------------------------------------------------------------------------------------------------------------------------------------------------------------------------------------------------------|
| Schwartz, Saffran, Fink, Myers, & Martin, 1994 | 8;6;<br>M=4;<br>F=2  | 60.00(8.37)<br>46-70 | Nonfluent = 5            | Above = 1<br>Mod. = 3<br>Sev. = 2 | 4.91<br>59-102  | <b>Type: I Description:</b> Mapping Therapy: 1) PWA read a sentence aloud and then, was given assistance if needed by the SLP. 2) They were asked to identify the verb, the agent and the patient/theme. 3) PWA would underline the verb and head noun in the noun phrases. <b>Intensity:</b> 3x/week, 60-90 min, 17.38 weeks                                                                          | 24.33(14.25)<br>32.17(15.20)<br>7.83 | Level of Evidence: III/class IV<br>Study protocol: +<br>Blinding: -<br>Sampling/allocation: CS<br>Treatment fidelity: -<br>Significance of primary outcome measure: +<br>Significance for st. outcome of interest: -<br>Precision: +<br>Intention to treat: N/A  |
| Silkes, 2015                                   | 4; 4;<br>N/A         | 60.25(1.26)<br>59-62 | Fluent=3<br>Nonfluent=1  | Mild = 1<br>Mod. = 1<br>Sev. = 2  | 58.5<br>24-96   | <b>Type: I Description:</b> Masked repetition priming treatment: Each section PWA saw prime-picture pair 16 times and had four opportunities to name each picture. PWA were instructed to watch the screen and try to name the picture when they saw it for the 4th time. <b>Intensity:</b> 2x/day, 12 days                                                                                            | 24.00(13.44)<br>26.50(14.55)<br>2.50 | Level of Evidence: III/class IV<br>Study protocol: +<br>Blinding: -<br>Sampling/allocation: CS<br>Treatment fidelity: -<br>Significance of primary outcome measure: -<br>Significance for st. outcome of interest: -<br>Precision: +<br>Intention to treat: N/A  |
| van Hees, Angwin, McMahon, & Copland, 2013     | 8; 8;<br>F=5;<br>M=3 | 56.38(9.15)<br>41-69 | Anomic=6<br>Conduction=2 | Mild                              | 52.25<br>17-170 | <b>Type: I Description:</b> Semantic Feature Analysis (SFA): 1) Name the item 2) produced semantic features (i.e., use, action, properties, location and association) 3) Name the item again Phonological Components Analysis (PCA) 1) Name the item 2) Produced phonological features (i.e., first sound, syllables, last sound, association and rhyme) <b>Intensity:</b> 3x/week, 60-90 min, 4 weeks | 38.50(15.44)<br>43.50(14.04)<br>5.00 | Level of Evidence: IIB/class III<br>Study protocol: +<br>Blinding: -<br>Sampling/allocation: CS<br>Treatment fidelity: -<br>Significance of primary outcome measure: +<br>Significance for st. outcome of interest: -<br>Precision: +<br>Intention to treat: N/A |

|                                                         |                          |                       |     |      |          |                                                                                                                                                                                                                                                                                                                                                           |                                      |                                                                                                                                                                                                                                                                  |
|---------------------------------------------------------|--------------------------|-----------------------|-----|------|----------|-----------------------------------------------------------------------------------------------------------------------------------------------------------------------------------------------------------------------------------------------------------------------------------------------------------------------------------------------------------|--------------------------------------|------------------------------------------------------------------------------------------------------------------------------------------------------------------------------------------------------------------------------------------------------------------|
| Votruba, Rapport, Whitman, Johnson, & Langenecker, 2013 | 50; 50;<br>M=28;<br>F=22 | 56.80(15.20)<br>20-85 | N/A | Mod. | 43.6 N/A | <b>Type:</b> INT <b>Description:</b> Outpatient speech language therapy (SLT): All PWA received mostly individual SLT and adjunct group SLT. Individual SLT addressed expressive language (100%), writing (92%), comprehension/reading/naming (83%), spelling (50%), repetition/prosody (8%). <b>Intensity:</b> Outpatient SLT university clinic schedule | 25.70(18.60)<br>26.90(19.80)<br>1.20 | Level of Evidence: IIB/class III<br>Study protocol: +<br>Blinding: -<br>Sampling/allocation: CS<br>Treatment fidelity: -<br>Significance of primary outcome measure: +<br>Significance for st. outcome of interest: -<br>Precision: +<br>Intention to treat: N/A |
|---------------------------------------------------------|--------------------------|-----------------------|-----|------|----------|-----------------------------------------------------------------------------------------------------------------------------------------------------------------------------------------------------------------------------------------------------------------------------------------------------------------------------------------------------------|--------------------------------------|------------------------------------------------------------------------------------------------------------------------------------------------------------------------------------------------------------------------------------------------------------------|



### Supplementary Material 7: Demographic information for between group studies using Western Aphasia Battery – Aphasia Quotient

Note: M=Male; F = Female; TCM = transcortical motor; TSM = transcortical sensory; sev. = severe; I = Impairment-based treatment; A/P = activity/participation-based treatment; INT = integrated treatment; st. = standardized; CS = convenience sample

| Study Name                                                 | N; Sex                              | Mean Age (SD) Range | Mean MPO range | Treatment (Tx)                                                                                                                                                                                                                                                                                                                                                                                                                                                                 | Pre-Tx M(SD) Post-Tx M(SD) Change Score | Mean Age(SD) Range | Mean MPO range | Treatment (Tx)                                                                                                                                                                                                                                                                                                                                                                                                          | Pre-Tx M(SD) Post-Tx M(SD) Change Score | Methodological Rigor                                                                                                                                                                                                                                        |
|------------------------------------------------------------|-------------------------------------|---------------------|----------------|--------------------------------------------------------------------------------------------------------------------------------------------------------------------------------------------------------------------------------------------------------------------------------------------------------------------------------------------------------------------------------------------------------------------------------------------------------------------------------|-----------------------------------------|--------------------|----------------|-------------------------------------------------------------------------------------------------------------------------------------------------------------------------------------------------------------------------------------------------------------------------------------------------------------------------------------------------------------------------------------------------------------------------|-----------------------------------------|-------------------------------------------------------------------------------------------------------------------------------------------------------------------------------------------------------------------------------------------------------------|
| Altmann et al., 2014                                       | G=7; M=2; F=5 NG=7 M=6; F=1         | 72.14 (10.51) 62-92 | 6+ N/A         | <b>Type: I Description:</b> Phase 1 and Phase 2: present pictures for naming Phase 3: PWA was presented with auditory/orthographic representations of category name and PWA generated a category member. Clinicians provided feedback and/or corrected them. Treatment started with L hand opening, reaching into a box to press a red button and making a non-meaningful circular gesture with Left hand during correction phase. <b>Intensity:</b> 5x/week, 120 min, 3 weeks | 65.47 (8.34) 67.09 (9.09) 1.62          | 63.00 (9.22) 53-80 | 6 MPO+ N/A     | <b>Type: I Description:</b> Phase 1 and Phase 2: present pictures for naming Phase 3: PWA was presented with auditory/orthographic representations of category name and PWA generated a category member. Clinicians provided feedback and/or corrected them. Treatment started with therapist pressing a button. There was no hand movement during the correction procedure <b>Intensity:</b> 5x/week, 120 min, 3 weeks | 71.91 (11.80) 72.89 (14.50) 0.98        | Level of Evidence: IIA/class II<br>Study protocol: +<br>Blinding: -<br>Sampling/allocation:+<br>Treatment fidelity: +<br>Significance of primary outcome measure: +<br>Significance for st. outcome of interest: +<br>Precision: +<br>Intention to treat: + |
| Des Roches, Balachandran, Ascenso, Tripodis, & Kiran, 2015 | E=40; N/A C= 9; M=7; F=2            | 62.98 (10.68) 38-83 | 53.3 1-178     | <b>Type: I Description:</b> Participants completed a variety (between 2-11) of 37 different cognitive or language tasks in Constant Therapy (e.g., naming, rhyming, memory, symbol matching, etc.) <b>Intensity:</b> 5x/week, ~45 min, 10 weeks                                                                                                                                                                                                                                | 68.90 (25.70) 72.90 (23.20) 3.91        | 67.11 (9.98) 53-87 | 98 13-359      | <b>Type: I Description:</b> Participants completed a variety (between 2-14) of 37 different cognitive or language tasks in Constant Therapy (e.g., naming, rhyming, memory, symbol matching, etc.) <b>Intensity:</b> 1x/week, 40 min, 10 weeks                                                                                                                                                                          | 67.70 (31.70) 68.90 (33.60) 1.12        | Level of Evidence: IIA/ class II<br>Study protocol: +<br>Blinding: -<br>Sampling/allocation:+<br>Treatment fidelity: +<br>Significance of primary outcome measure: +<br>Significance for st. outcome of interest:+<br>Precision: +<br>Intention to treat: + |
| Godecke, Hird, Lalor, Rai, & Phillips, 2012                | DT=32; M=14; F=18 UC=27; M=15; F=12 | 70.30 (12.8)        | 6.1 DPO N/A    | <b>Type: I Description:</b> Participants were administered impairment-based therapies (i.e., lexical-semantic (BOX), mapping, semantic feature analysis (SFA)) <b>Intensity:</b> 5x/week, 30-80 min, 4 weeks                                                                                                                                                                                                                                                                   | 33.78 (26.37) 56.42 (30.76) 22.64       | 67.70 (15.40)      | 3.4 DPO N/A    | <b>Type: I Description:</b> Participants were administered impairment-based therapies (i.e., lexical-semantic (BOX), mapping, semantic feature analysis (SFA)). <b>Intensity:</b> 1x/week, 80 min, 4 weeks                                                                                                                                                                                                              | 20.46 (26.11) 34.12 (33.22) 13.66       | Level of Evidence: IIB/ class III<br>Study protocol: +<br>Blinding: +<br>Sampling/allocation:+<br>Treatment fidelity: +<br>Significance of primary outcome measure: +<br>Significance for st. outcome of interest: +                                        |

|                      |                                                    |                           |                    |                                                                                                                                                                                                                                                                                                                                                                                                                                                                                                                                                                                                            |                                               |                           |                   |                                                                                                                                                                                                                                                                                                                                        |                                               |                                                                                                                                                                                                                                                                         |
|----------------------|----------------------------------------------------|---------------------------|--------------------|------------------------------------------------------------------------------------------------------------------------------------------------------------------------------------------------------------------------------------------------------------------------------------------------------------------------------------------------------------------------------------------------------------------------------------------------------------------------------------------------------------------------------------------------------------------------------------------------------------|-----------------------------------------------|---------------------------|-------------------|----------------------------------------------------------------------------------------------------------------------------------------------------------------------------------------------------------------------------------------------------------------------------------------------------------------------------------------|-----------------------------------------------|-------------------------------------------------------------------------------------------------------------------------------------------------------------------------------------------------------------------------------------------------------------------------|
|                      |                                                    |                           |                    |                                                                                                                                                                                                                                                                                                                                                                                                                                                                                                                                                                                                            |                                               |                           |                   |                                                                                                                                                                                                                                                                                                                                        |                                               | Precision: +<br>Intention to treat: +                                                                                                                                                                                                                                   |
| Godecke et al., 2014 | VER=20;<br>M=12;<br>F=8<br>UC=27;<br>M=15;<br>F=12 | 70.70<br>(14.30)          | 3.4<br>DPO<br>N/A  | <b>Type:</b> INT; <b>Description:</b> PWA received either individual or group therapy. Individual therapy consisted of Semantic Feature Analysis (SFA), Cued Naming Therapy, Lexical-Semantic (BOX), Mapping therapy and/or Phonological Feature Therapy. Group therapy consisted of Constraint Induced Aphasia Therapy (CIAT). 5x/week, 180-240 min, 4 weeks                                                                                                                                                                                                                                              | 43.53<br>(27.02)<br>67.55<br>(30.16)<br>24.02 | 67.7<br>(15.4)            | 3.2 DPO<br>N/A    | <b>Type:</b> I <b>Description:</b> 85% of participants did not receive direct speech and language therapy. When participants received therapy, it consisted of BOX therapy, Mapping therapy and Semantic Feature Analysis (SFA). <b>Intensity:</b> 11min, ~ 3 weeks                                                                    | 19.62<br>(26.26)<br>32.83<br>(45.62)<br>11.75 | Level of Evidence: IIB/<br>class III<br>Study protocol: +<br>Blinding: +<br>Sampling/allocation:CS<br>Treatment fidelity: +<br>Significance of primary<br>outcome measure: +<br>Significance for st.<br>outcome of interest: +<br>Precision: +<br>Intention to treat: + |
| Katz & Wertz, 1997   | CRT=21;<br>N/A<br>CS=29;<br>N/A                    | 61.60<br>(10.00)<br>48-83 | 74.4<br>12-<br>228 | <b>Type:</b> I <b>Description:</b> Visual matching and reading comprehension software consisted of 10 matching activities (e.g., letters and words) and 22 reading comprehension activities (e.g., letters, words, phrases). The tasks varied in complexity (i.e., 8 difficulty levels). <b>Intensity:</b> 3x/week, 60 min, 26 weeks                                                                                                                                                                                                                                                                       | 68.90<br>(24.30)<br>73.60<br>(22.60)<br>4.70  | 66.40<br>(6.00)<br>53-76  | 64.80<br>21.6-228 | <b>Type:</b> N/A <b>Description:</b> Computer stimulation software included games (e.g., Mini Putt) and cognitive rehabilitation tasks (e.g., Captain's Log). <b>Intensity:</b> 3x/week, 60 min, 26 weeks                                                                                                                              | 61.90<br>(29.50)<br>63.40<br>(28.50)<br>1.50  | Level of Evidence:<br>IB/class I<br>Study protocol: +<br>Blinding: +<br>Sampling/allocation:CS<br>Treatment fidelity: +<br>Significance of primary<br>outcome measure: +<br>Significance for st.<br>outcome of interest: +<br>Precision: +<br>Intention to treat: +     |
| Maher et al., 2006   | CILT=4;<br>M=3;<br>F=1<br>PACE=5;<br>M=3;<br>F=2   | 48.25<br>(6.99)<br>40-55  | 38.75<br>24-48     | <b>Type:</b> A/P <b>Description:</b> Constraint Induced Language Therapy (CILT): Treatment was given in groups of two or three with two clinicians also participating in the group. PWA were constrained to verbal expression only. Multi-modal communication was restricted and a barrier was placed between PWA to further reduce it. They played a card game in which they had to ask another participant for a card with the attempt of matching a card in their own hand. Speakers took turns and responses were shaped to increase complexity over time. <b>Intensity:</b> 4x/week, 180 min, 2 weeks | 58.55<br>(12.99)<br>65.08<br>(10.22)<br>6.52  | 59.00<br>(12.81)<br>41-73 | 35.4<br>14-72     | <b>Type:</b> A/P <b>Description:</b> Treatment used a modified Promoting Aphasics' Communication Effectiveness (PACE) approach. PWA could use multi-modal communication to perform the task. Intervention was provided to improve any incorrect responses regardless of the modality used. <b>Intensity:</b> 4x/week, 180 min, 2 weeks | 53.94<br>(13.21)<br>56.90<br>(13.93)<br>2.96  | Level of Evidence: IIA/<br>class II<br>Study protocol: +<br>Blinding: -<br>Sampling/allocation:CS<br>Treatment fidelity: +<br>Significance of primary<br>outcome measure: -<br>Significance for st.<br>outcome of interest: -<br>Precision: +<br>Intention to treat: +  |

### Supplementary Material 8: Demographic information for between group studies using Boston Naming Test

Note: M=Male; F = Female; TCM = transcortical motor; TSM = transcortical sensory; sev. = severe; I = Impairment-based treatment; A/P = activity/participation-based treatment; INT = integrated treatment; st. = standardized; CS = convenience sample

| Study Name                                                 | N; Sex                       | Mean Age (SD) Range | Mean MPO range | Treatment (Tx)                                                                                                                                                                                                                                                                                                                                                                                                                                                                 | Pre-Tx M(SD) Post-Tx M(SD) Change Score | Mean Age(SD) Range | Mean MPO range | Treatment (Tx)                                                                                                                                                                                                                                                                                                                                                                                                          | Pre-Tx M(SD) Post-Tx M(SD) Change Score | Methodological Rigor                                                                                                                                                                                                                                             |
|------------------------------------------------------------|------------------------------|---------------------|----------------|--------------------------------------------------------------------------------------------------------------------------------------------------------------------------------------------------------------------------------------------------------------------------------------------------------------------------------------------------------------------------------------------------------------------------------------------------------------------------------|-----------------------------------------|--------------------|----------------|-------------------------------------------------------------------------------------------------------------------------------------------------------------------------------------------------------------------------------------------------------------------------------------------------------------------------------------------------------------------------------------------------------------------------|-----------------------------------------|------------------------------------------------------------------------------------------------------------------------------------------------------------------------------------------------------------------------------------------------------------------|
| Altmann et al., 2014                                       | G=7; F=5; M=2 NG=7; M=6; F=1 | 72.10 (10.50) 62-92 | N/A 6+         | <b>Type: I Description:</b> Phase 1 and Phase 2: present pictures for naming Phase 3: PWA was presented with auditory/orthographic representations of category name and PWA generated a category member. Clinicians provided feedback and/or corrected them. Treatment started with L hand opening, reaching into a box to press a red button and making a non-meaningful circular gesture with Left hand during correction phase. <b>Intensity:</b> 5x/week, 120 min, 3 weeks | 24.71 (13.44) 28.57 (16.07) 3.86        | 63.00 (9.20) 53-80 | N/A 6+         | <b>Type: I Description:</b> Phase 1 and Phase 2: present pictures for naming Phase 3: PWA was presented with auditory/orthographic representations of category name and PWA generated a category member. Clinicians provided feedback and/or corrected them. Treatment started with therapist pressing a button. There was no hand movement during the correction procedure <b>Intensity:</b> 5x/week, 120 min, 3 weeks | 30.86 (6.26) 33.86 (9.56) 3.00          | Level of Evidence: IIA/class II<br>Study protocol: +<br>Blinding: -<br>Sampling/allocation: CS<br>Treatment fidelity: +<br>Significance of primary outcome measure: +<br>Significance for st. outcome of interest: +<br>Precision: +<br>Intention to treat: N/A  |
| Des Roches, Balachandran, Ascenso, Tripodis, & Kiran, 2015 | E=40; N/A C= 9; M=7; F=2     | 62.98 (10.68) 38-83 | 53.3 1-178     | <b>Type: I Description:</b> Participants completed a variety (between 2-11) of 37 different cognitive or language tasks in Constant Therapy (e.g., naming, rhyming, memory, symbol matching, etc.) <b>Intensity:</b> 5x/week, ~45 min, 10 weeks                                                                                                                                                                                                                                | 28.29 (22.33) 29.45 (21.25) 1.16        | 67.11 (9.98) 53-87 | 98 13-359      | <b>Type: I Description:</b> Participants completed a variety (between 2-14) of 37 different cognitive or language tasks in Constant Therapy (e.g., naming, rhyming, memory, symbol matching, etc.) <b>Intensity:</b> 1x/week, 40 min, 10 weeks                                                                                                                                                                          | 26.66 (24.40) 26.23 (23.86) -43         | Level of Evidence: IIA/ class II<br>Study protocol: +<br>Blinding: -<br>Sampling/allocation: CS<br>Treatment fidelity: +<br>Significance of primary outcome measure: +<br>Significance for st. outcome of interest: +<br>Precision: +<br>Intention to treat: N/A |

|                       |                                                  |                           |                |                                                                                                                                                                                                                                                                                                                                                                                                                                                                                                                                                                                                            |                                              |                           |               |                                                                                                                                                                                                                                                                                                                                        |                                              |                                                                                                                                                                                                                                                                                            |
|-----------------------|--------------------------------------------------|---------------------------|----------------|------------------------------------------------------------------------------------------------------------------------------------------------------------------------------------------------------------------------------------------------------------------------------------------------------------------------------------------------------------------------------------------------------------------------------------------------------------------------------------------------------------------------------------------------------------------------------------------------------------|----------------------------------------------|---------------------------|---------------|----------------------------------------------------------------------------------------------------------------------------------------------------------------------------------------------------------------------------------------------------------------------------------------------------------------------------------------|----------------------------------------------|--------------------------------------------------------------------------------------------------------------------------------------------------------------------------------------------------------------------------------------------------------------------------------------------|
| Maier et al., 2006    | CILT=4;<br>M=3;<br>F=1<br>PACE=5;<br>M=3;<br>F=2 | 48.25<br>(6.99)<br>40-55  | 38.752<br>4-48 | <b>Type:</b> A/P <b>Description:</b> Constraint Induced Language Therapy (CILT): Treatment was given in groups of two or three with two clinicians also participating in the group. PWA were constrained to verbal expression only. Multi-modal communication was restricted and a barrier was placed between PWA to further reduce it. They played a card game in which they had to ask another participant for a card with the attempt of matching a card in their own hand. Speakers took turns and responses were shaped to increase complexity over time. <b>Intensity:</b> 4x/week, 180 min, 2 weeks | 18.00<br>(16.47)<br>21.00<br>(17.32)<br>3.00 | 59.00<br>(12.81)<br>41-73 | 35.4<br>14-72 | <b>Type:</b> A/P <b>Description:</b> Treatment used a modified Promoting Aphasics' Communication Effectiveness (PACE) approach. PWA could use multi-modal communication to perform the task. Intervention was provided to improve any incorrect responses regardless of the modality used. <b>Intensity:</b> 4x/week, 180 min, 2 weeks | 15.20<br>(19.64)<br>18.60<br>(21.98)<br>3.40 | Level of Evidence: IIA/<br>class II<br>Study protocol: +<br>Blinding: -<br>Sampling/allocation: CS<br>Treatment fidelity: +<br>Significance of primary<br>outcome measure: +<br>Significance for st.<br>outcome of interest: +<br>Precision: +<br>Intention to treat: -                    |
| Raglio et al., 2016   | E=10;<br>M=7;<br>F=3<br>C=10<br>M=7;<br>F=3      | 61.30<br>(12.76)<br>42-89 | chronic        | <b>Type:</b> INT <b>Description:</b> Music therapy + Speech Therapy: Treatment involved a Promoting Aphasics' Communicative Effectiveness (PACE) approach with the addition of music therapy (i.e., play instruments sing with therapist) <b>Intensity:</b> 2x/week, 75 min, 15 weeks                                                                                                                                                                                                                                                                                                                      | 23.00<br>(21.00)<br>26.00<br>(21.00)<br>3.00 | 70.90<br>(8.99)<br>61-89  | chronic       | <b>Type:</b> A/P <b>Description:</b> Treatment consisted of a Promoting Aphasics' Communicative Effectiveness (PACE) approach only. <b>Intensity:</b> 2x/week, 45 mins, 15 weeks                                                                                                                                                       | 16<br>(19)<br>19<br>(19)<br>3.00             | Level of Evidence:<br>IB/class I<br>Study protocol: +<br>Blinding: -<br>Sampling/allocation: CS<br>Treatment fidelity: -<br>Significance of primary<br>outcome measure: +<br>Significance for st.<br>outcome of interest: +<br>Precision: +<br>Intention to treat: +                       |
| Wilssens et al., 2015 | CIAT=5;<br>N/A<br>BOX=4;<br>N/A                  | 63.00<br>(8.00)           | 61 N/A         | <b>Type:</b> INT <b>Description:</b> Constraint Induced Aphasia Therapy (CIAT): PWA participated in a communication-based group with card games (e.g., "Go Fish"). Verbal expression was encouraged in the game context. They were allowed to produce gestures when communicate, but these were hidden from view of other PWA with a screen. <b>Intensity:</b> daily, 120-180 min, 9-10 consecutive working days                                                                                                                                                                                           | 30.20<br>(14.00)<br>39.8<br>(13.8)<br>9.6    | 71.00<br>(9.00)<br>60-81  | 52            | <b>Type:</b> I <b>Description:</b> PWA were administered BOX, a treatment focused on semantic processing using written words, sentences and longer texts. <b>Intensity:</b> daily, 120-180 min, 9-10 consecutive working days                                                                                                          | 29.00<br>(20.10)<br>39.8<br>(13.9)<br>10.8   | Level of Evidence: IIA/<br>class II<br>Study protocol: +<br>Blinding: -<br>Sampling/allocation: CS<br>Treatment fidelity: +<br>Significance of primary<br>outcome measure: +<br>Significance for st.<br>outcome of interest: +<br>Precision: +<br>Intention to treat: No<br>attrition: N/A |

## Supplementary Material 9: References for all included studies

### Included Within Group Studies

- Aftonomos, L. B., Appelbaum, J. S., & Steele, R. D. (1999). Improving outcomes for persons with aphasia in advanced community-based treatment programs. *Stroke; a Journal of Cerebral Circulation*, *30*(7), 1370–1379.
- Aftonomos, L. B., Steele, R. D., & Wertz, R. T. (1997). Promoting recovery in chronic aphasia with an interactive technology. *Archives of Physical Medicine and Rehabilitation*, *78*(8), 841–846.
- Archibald, L. M. D., Orange, J. B., & Jamieson, D. J. (2009). Implementation of computer-based language therapy in aphasia. *Therapeutic Advances in Neurological Disorders*, *2*(5), 299–311. <https://doi.org/10.1177/1756285609336548>
- Babbitt, E., Worrall, L., & Cherney, L. R. (2015). Structure, Processes, and Retrospective Outcomes From an Intensive Comprehensive Aphasia Program. *American Journal of Speech-Language Pathology / American Speech-Language-Hearing Association*, *24*(4), 854–63.
- Bakheit, A. M. O., Carrington, S., Griffiths, S., & Searle, K. (2005). High scores on the Western Aphasia Battery correlate with good functional communication skills (as measured with the Communicative Effectiveness Index) in aphasic stroke patients. *Disability and Rehabilitation: An International, Multidisciplinary Journal*, *27*(6), 287–291. <https://doi.org/10.1080/09638280400009006>
- Ball, A. L., de Riesthal, M., Breeding, V. E., & Mendoza, D. E. (2011). Modified ACT and CART in severe aphasia. *Aphasiology*, *25*(6–7), 836–848. <https://doi.org/10.1080/02687038.2010.544320>
- Barthel, G., Meinzer, M., Djundja, D., & Rockstroh, B. (2008). Intensive language therapy in chronic aphasia: Which aspects contribute most? *Aphasiology*, *22*(4), 408–421. <https://doi.org/10.1080/02687030701415880>
- Beeson, P. M., Rising, K., & Volk, J. (2003). Writing treatment for severe aphasia: Who benefits? *Journal of Speech, Language, and Hearing Research*, *46*(5), 1038–1060. [https://doi.org/10.1044/1092-4388\(2003/083\)](https://doi.org/10.1044/1092-4388(2003/083))
- Boles, L. (1997). Conversation analysis as a dependent measure in communication therapy with four individuals with aphasia. *Asia Pacific Journal of Speech, Language & Hearing*, *2*(1), 43–61 19p.
- Breier, J. I., Maher, L. M., Novak, B., & Papanicolaou, A. C. (2006). Functional Imaging Before and After Constraint-Induced Language Therapy for Aphasia Using Magnetoencephalography. *Neurocase*, *12*(6), 322–331. <https://doi.org/10.1080/13554790601126054>
- Brown, J. W., & Chobor, K. L. (1989). Therapy with a prosthesis for writing in aphasia. *Aphasiology*, *3*(8), 709–715.
- Cherney, L. R. (2010). Oral reading for language in aphasia: Impact of aphasia severity on cross-modal outcomes in chronic nonfluent aphasia. *Seminars in Speech and Language*, *31*(1), 42–51. <https://doi.org/10.1055/s-0029-1244952>
- Cherney, L. R., & Halper, A. S. (2008). Novel technology for treating individuals with aphasia and concomitant cognitive deficits. *Topics in Stroke Rehabilitation*, *15*(6), 542–554. <https://doi.org/10.1310/tsr1506-542>

- Cherney, L. R., Halper, A. S., Holland, A. L., & Cole, R. (2008). Computerized script training for aphasia: Preliminary results. *American Journal of Speech-Language Pathology*, *17*(1), 19–34. [https://doi.org/10.1044/1058-0360\(2008/003\)](https://doi.org/10.1044/1058-0360(2008/003))
- Code, C., Torney, A., Gildea-Howardine, E., & Willmes, K. (2010). Outcome of a one-month therapy intensive for chronic aphasia: Variable individual responses. *Seminars in Speech and Language*, *31*(1), 21–23. <https://doi.org/10.1055/s-0029-1244950>
- Doyle, P. J., Goldstein, H., & Bourgeois, M. S. (1987). Experimental analysis of syntax training in Broca's aphasia: A generalization and social validation study. *Journal of Speech & Hearing Disorders*, *52*(2), 143–155.
- Duncan, E. S., Schmah, T., & Small, S. L. (2016). Performance Variability as a Predictor of Response to Aphasia Treatment. *Neurorehabilitation and Neural Repair* *Neurorehabilitation and Neural Repair*.
- Edmonds, L. A., & Kiran, S. (2006). Effect of semantic naming treatment on crosslinguistic generalization in bilingual aphasia. *Journal of Speech, Language, and Hearing Research*, *49*(4), 729–748. [https://doi.org/10.1044/1092-4388\(2006/053\)](https://doi.org/10.1044/1092-4388(2006/053))
- Edmonds, L. A., Nadeau, S. E., & Kiran, S. (2009). Effect of verb network strengthening treatment (VNeST) on lexical retrieval of content words in sentences in persons with aphasia. *Aphasiology*, *23*(3), 402–424. <https://doi.org/10.1080/02687030802291339>
- Edmonds, Lisa A., Mammino, K., & Ojeda, J. (2014). Effect of Verb Network Strengthening Treatment (VNeST) in persons with aphasia: Extension and replication of previous findings. *American Journal of Speech-Language Pathology*, *23*(2), S312–S329. [https://doi.org/10.1044/2014\\_AJSLP-13-0098](https://doi.org/10.1044/2014_AJSLP-13-0098)
- Falconer, C., & Antonucci, S. M. (2012). Use of semantic feature analysis in group discourse treatment for aphasia: Extension and expansion. *Aphasiology*, *26*(1), 64–82. <https://doi.org/10.1080/02687038.2011.602390>
- Faroqi-Shah, Y. (2008). A comparison of two theoretically driven treatments for verb inflection deficits in aphasia. *Neuropsychologia*, *46*(13), 3088–3100. <https://doi.org/10.1016/j.neuropsychologia.2008.06.018>
- Faroqi-Shah, Y. (2013). Selective treatment of regular versus irregular verbs in agrammatic aphasia: Efficacy data. *Aphasiology*, *27*(6), 678–705. <https://doi.org/10.1080/02687038.2012.751577>
- Ferguson, N. F., Evans, K., & Raymer, A. M. (2012). A comparison of intention and pantomime gesture treatment for noun retrieval in people with aphasia. *American Journal of Speech-Language Pathology*, *21*(2), s126–s139. [https://doi.org/10.1044/1058-0360\(2012/11-0076\)](https://doi.org/10.1044/1058-0360(2012/11-0076))
- Fridriksson, J., Morrow-Odom, L., Moser, D., Fridriksson, A., & Baylis, G. (2006). Neural recruitment associated with anomia treatment in aphasia. *NeuroImage*, *32*(3), 1403–1412. <https://doi.org/10.1016/j.neuroimage.2006.04.194>
- Johnson, R. K., Hough, M. S., King, K. A., Vos, P., & Jeffs, T. (2008). Functional communication in individuals with chronic severe aphasia using augmentative communication. *AAC: Augmentative and Alternative Communication*, *24*(4), 269–280. <https://doi.org/10.1080/07434610802463957>

- Kendall, D. L., Oelke, M., Brookshire, C. E., & Nadeau, S. E. (2015). The Influence of Phonomotor Treatment on Word Retrieval Abilities in 26 Individuals With Chronic Aphasia: An Open Trial. *Journal of Speech, Language & Hearing Research, 58*(3), 798–812 15p. [https://doi.org/10.1044/2015\\_JSLHR-L-14-0131](https://doi.org/10.1044/2015_JSLHR-L-14-0131)
- Kendall, D. L., Raymer, A., Rose, M., Gilbert, J., & Gonzalez Rothi, L. J. (2014). Anomia treatment platform as behavioral engine for use in research on physiological adjuvants to neurorehabilitation. *Journal of Rehabilitation Research and Development, 51*(3), 391–400. <https://doi.org/10.1682/JRRD.2013.08.0172>
- Kendall, D. L., Rosenbek, J. C., Heilman, K. M., Conway, T., Klenberg, K., Gonzalez Rothi, L. J., & Nadeau, S. E. (2008). Phoneme-based rehabilitation of anomia in aphasia. *Brain and Language, 105*(1), 1–17. <https://doi.org/10.1016/j.bandl.2007.11.007>
- Kiran, S. (2005). Training phoneme to grapheme conversion for patients with written and oral production deficits: A model-based approach. *Aphasiology, 19*(1), 53–76. <https://doi.org/10.1080/02687030444000633>
- Kiran, S. (2008). Typicality of inanimate category exemplars in aphasia treatment: Further evidence for semantic complexity. *Journal of Speech, Language, and Hearing Research, 51*(6), 1550–1568. [https://doi.org/10.1044/1092-4388\(2008/07-0038\)](https://doi.org/10.1044/1092-4388(2008/07-0038))
- Kiran, S., & Johnson, L. (2008). Semantic complexity in treatment of naming deficits in aphasia: Evidence from well-defined categories. *American Journal of Speech-Language Pathology, 17*(4), 389–400.
- Kiran, S., Sandberg, C., & Abbott, K. (2009). Treatment for lexical retrieval using abstract and concrete words in persons with aphasia: Effect of complexity. *Aphasiology, 23*(7–8), 835–853. <https://doi.org/10.1080/02687030802588866>
- Kiran, S., Sandberg, C., & Sebastian, R. (2011). Treatment of Category Generation and Retrieval in Aphasia: Effect of Typicality of Category Items. *Journal of Speech Language and Hearing Research, 54*(4), 1101. [https://doi.org/10.1044/1092-4388\(2010/10-0117\)](https://doi.org/10.1044/1092-4388(2010/10-0117))
- Kiran, S., & Thompson, C. K. (2003). The Role of Semantic Complexity in Treatment of Naming Deficits Training Semantic Categories in Fluent Aphasia by Controlling Exemplar Typicality. *Journal of Speech, Language, and Hearing Research, 46*(4), 773–787.
- Kurland, J., Wilkins, A. R., & Stokes, P. (2014). iPractice: Piloting the effectiveness of a tablet-based home practice program in aphasia treatment. *Seminars in Speech and Language, 35*(1), 51–63.
- Lacey, E. H., Lott, S. N., Snider, S. F., Sperling, A., & Friedman, R. B. (2010). Multiple Oral Re-reading treatment for alexia: The parts may be greater than the whole. *Neuropsychological Rehabilitation, 20*(4), 601–623.
- Lesser, R., Bryan, K., Anderson, J., & Hilton, R. (1986). Involving relatives in aphasia therapy: An application of language enrichment therapy. *International Journal of Rehabilitation Research, 9*(3), 259–267. <https://doi.org/10.1097/00004356-198609000-00005>
- Macauley, B. L. (2006). Animal-assisted therapy for persons with aphasia: A pilot study. *Journal of Rehabilitation Research and Development, 43*(3), 357–366.

- MacGregor, L. J., Difrancesco, S., Pulvermüller, F., Shtyrov, Y., & Mohr, B. (2015). Ultra-rapid access to words in chronic aphasia: The effects of intensive language action therapy (ILAT). *Brain Topography*, *28*(2), 279–291. <https://doi.org/10.1007/s10548-014-0398-y>
- Marshall, R. S., Laures-Gore, J., DuBay, M., Williams, T., & Bryant, D. (2015). Unilateral forced nostril breathing and aphasia—Exploring unilateral forced nostril breathing as an adjunct to aphasia treatment: A case series. *The Journal of Alternative and Complementary Medicine*, *21*(2), 91–99. <https://doi.org/10.1089/acm.2013.0285>
- Milman, L., Clendenen, D., & Vega-Mendoza, M. (2014). Production and integrated training of adjectives in three individuals with nonfluent aphasia. *Aphasiology*, *28*(10), 1198–1222. <https://doi.org/10.1080/02687038.2014.910590>
- Milman, L., Vega-Mendoza, M., & Clendenen, D. (2014). Integrated training for aphasia: An application of part-whole learning to treat lexical retrieval, sentence production, and discourse-level communications in three cases of nonfluent aphasia. *American Journal of Speech-Language Pathology*, *23*(2), 105–119. [https://doi.org/10.1044/2014\\_AJSLP-12-0054](https://doi.org/10.1044/2014_AJSLP-12-0054)
- Mohr, B., Difrancesco, S., Harrington, K., Evans, S., & Pulvermüller, F. (2014). Changes of right-hemispheric activation after constraint-induced, intensive language action therapy in chronic aphasia: fMRI evidence from auditory semantic processing. *Frontiers in Human Neuroscience*, *8*(November). <https://doi.org/10.3389/fnhum.2014.00919>
- Mozeiko, J., Coelho, C. A., & Myers, E. B. (2016). The role of intensity in constraint-induced language therapy for people with chronic aphasia. *Aphasiology*, *30*(4), 339–363. <https://doi.org/10.1080/02687038.2015.1070949>
- Nettleton, J., & Lesser, R. (1991). Therapy for naming difficulties in aphasia: Application of a cognitive neuropsychological model. *NEL Journal of Neurolinguistics*, *6*(2), 139–157.
- Nickels, L., & Osborne, A. (2016). Constraint Induced Aphasia Therapy: Volunteer-led, unconstrained and less intense delivery can be effective. *NeuroRehabilitation*, *39*(1), 97–109. <https://doi.org/10.3233/NRE-161341>
- Purdy, M., & Wallace, S. E. (2015). Intensive multimodal communication treatment for people with chronic aphasia. *Aphasiology*, *29*, 1–23.
- Raymer, A. M., Kohen, F. P., & Saffell, D. (2006). Computerised training for impairments of word comprehension and retrieval in aphasia. *Aphasiology*, *20*(2–4), 257–268. <https://doi.org/10.1080/02687030500473312>
- Raymer, A. M., McHose, B., Smith, K. G., Iman, L., Ambrose, A., & Casselton, C. (2012). Contrasting effects of errorless naming treatment and gestural facilitation for word retrieval in aphasia. *Neuropsychological Rehabilitation*, *22*(2), 235–266. <https://doi.org/10.1080/09602011.2011.618306>
- Raymer, A. M., Singletary, F., Rodriguez, A., Ciampitti, M., Heilman, K. M., & Rothi, L. J. G. (2006). Effects of gesture+verbal treatment for noun and verb retrieval in aphasia. *Journal of the International Neuropsychological Society*, *12*(6), 867–882. <https://doi.org/10.1017/S1355617706061042>



- Rider, J. D., Wright, H. H., Marshall, R. C., & Page, J. L. (2008). Using semantic feature analysis to improve contextual discourse in adults with aphasia. *American Journal of Speech-Language Pathology*, *17*(2), 161–172. [https://doi.org/10.1044/1058-0360\(2008/016\)](https://doi.org/10.1044/1058-0360(2008/016))
- Rodriguez, A. D., Raymer, A. M., & Rothi, L. J. G. (2006). Effects of gesture+verbal and semantic-phonologic treatments for verb retrieval in aphasia. *Aphasiology*, *20*(2–4), 286–297. <https://doi.org/10.1080/02687030500474898>
- Rodriguez, A. D., Worrall, L., Brown, K., Grohn, B., McKinnon, E., Pearson, C., ... Copland, D. A. (2013). Aphasia LIFT: Exploratory investigation of an intensive comprehensive aphasia programme. *Aphasiology*, *27*(11), 1339–1361. <https://doi.org/10.1080/02687038.2013.825759>
- Rose, M. L., Attard, M. C., Mok, Z., Lanyon, L. E., & Foster, A. M. (2013). Multi-modality aphasia therapy is as efficacious as a constraint-induced aphasia therapy for chronic aphasia: A phase 1 study. *Aphasiology*, *27*(8), 938–971. <https://doi.org/10.1080/02687038.2013.810329>
- Sandberg, C. W., Bohland, J. W., & Kiran, S. (2015). Changes in functional connectivity related to direct training and generalization effects of a word finding treatment in chronic aphasia. *Brain and Language*, *150*, 103–116. <https://doi.org/10.1016/j.bandl.2015.09.002>
- Schneider, S., & Thompson, C. (2003). Verb production in agrammatic aphasia: The influence of semantic class and argument structure properties on generalisation. *Aphasiology*, *17*(3), 213–241.
- Schwartz, M. F., Saffran, E. M., Fink, R. B., Myers, J. L., & Martin, N. (1994). Mapping therapy: A treatment programme for agrammatism. *Aphasiology*, *8*(1), 19–54. <https://doi.org/10.1080/02687039408248639>
- Silkes, J. P. (2015). Masked Repetition Priming in Treatment of Anomia: A Phase 2 Study. *American Journal of Speech-Language Pathology*, *24*(4), S895–S912 18p. [https://doi.org/10.1044/2015\\_AJSLP-14-0138](https://doi.org/10.1044/2015_AJSLP-14-0138)
- Sorin-Peters, R., & Behrmann, M. (1995). Change in perception of communication abilities of aphasic patients and their families. *Aphasiology*, *9*(6), 565–575. <https://doi.org/10.1080/02687039508248715>
- Steele, R. D., Baird, A., McCall, D., & Haynes, L. (2014). Combining Teletherapy and On-line Language Exercises in the Treatment of Chronic Aphasia: An Outcome Study. *International Journal of Telerehabilitation*, *6*(2), 3–20. <https://doi.org/10.5195/ijt.2014.6157>
- Thompson, C. K., Shapiro, L., Kiran, S., & Sobecks, J. (2003). The role of syntactic complexity in treatment of sentence deficits in agrammatic aphasia: The complexity account of treatment efficacy (CATE). *Journal of Speech, Language, and Hearing Research*, *46*(3), 591–607. [https://doi.org/10.1044/1092-4388\(2003/047\)](https://doi.org/10.1044/1092-4388(2003/047))
- van der Gaag, A., Smith, L., Davis, S., Moss, B., Cornelius, V., Laing, S., & Mowles, C. (2005). Therapy and support services for people with long-term stroke and aphasia and their relatives: A six-month follow-up study. *Clinical Rehabilitation*, *19*(4), 372–380. <https://doi.org/10.1191/0269215505cr785oa>
- van Hees, S., Angwin, A., McMahon, K., & Copland, D. (2013). A comparison of semantic feature analysis and phonological components analysis for the treatment of naming impairments in aphasia. *Neuropsychological Rehabilitation*, *23*(1), 102–132. <https://doi.org/10.1080/09602011.2012.726201>

Votruba, K. L., Rapport, L. J., Whitman, R. D., Johnson, A., & Langenecker, S. (2013). Personality differences among patients with chronic aphasia predict improvement in speech-language therapy. *Topics in Stroke Rehabilitation, 20*(5), 421–431. <https://doi.org/10.1310/tsr2005-421>

Waller, A., Dennis, F., Brodie, J., & Cairns, A. Y. (1998). Evaluating the use of TalksBac, a predictive communication device for nonfluent adults with aphasia. *International Journal of Language & Communication Disorders, 33*(1), 45–70. <https://doi.org/10.1080/136828298247929>

Wambaugh, J. L., Wright, S., & Nessler, C. (2012). Modified response elaboration training: A systematic extension with replications. *Aphasiology, 26*(12), 1407–1439. <https://doi.org/10.1080/02687038.2012.702887>

Wilson, K. R., O'Rourke, H., Wozniak, L. A., Kostopoulos, E., Marchand, Y., & Newman, A. J. (2012). Changes in N400 topography following intensive speech language therapy for individuals with aphasia. *Brain and Language, 123*(2), 94–103. <https://doi.org/10.1016/j.bandl.2012.06.005>

### **Included Between Group Studies**

Altmann, L. J. P., Hazamy, A. A., Carvajal, P. J., Benjamin, M., Rosenbek, J. C., & Crosson, B. (2014). Delayed stimulus-specific improvements in discourse following anomia treatment using an intentional gesture. *Journal of Speech, Language, and Hearing Research, 57*(2), 439–454. [https://doi.org/10.1044/1092-4388\(2013/12-0224\)](https://doi.org/10.1044/1092-4388(2013/12-0224))

Des Roches, C. A., Balachandran, I., Ascenso, E. M., Tripodis, Y., & Kiran, S. (2015a). Effectiveness of an impairment-based individualized rehabilitation program using an iPad-based software platform. *Frontiers in Human Neuroscience, 8*. <https://doi.org/10.3389/fnhum.2014.01015>

Des Roches, C. A., Balachandran, I., Ascenso, E. M., Tripodis, Y., & Kiran, S. (2015b). Effectiveness of an impairment-based individualized rehabilitation program using an iPad-based software platform. *Frontiers in Human Neuroscience, 8*. Retrieved from <http://search.ebscohost.com/login.aspx?direct=true&db=psyh&AN=2015-26028-001&site=ehost-live&scope=site>

Godecke, E., Ciccone, N. A., Granger, A. S., Rai, T., West, D., Cream, A., ... Hankey, G. J. (2014). A comparison of aphasia therapy outcomes before and after a Very Early Rehabilitation programme following stroke. *International Journal of Language & Communication Disorders, 49*(2), 149–161 13p. <https://doi.org/10.1111/1460-6984.12074>

Godecke, E., Hird, K., Lalor, E. E., Rai, T., & Phillips, M. R. (2012). Very early poststroke aphasia therapy: a pilot randomized controlled efficacy trial. *International Journal of Stroke: Official Journal of the International Stroke Society, 7*(8), 635–644. <https://doi.org/10.1111/j.1747-4949.2011.00631.x>

Katz, R. C., & Wertz, R. T. (1997). The efficacy of computer-provided reading treatment for chronic aphasic adults. *Journal of Speech & Hearing Research, 40*(3), 493–507.

Maher, L. M., Kendall, D., Swearingin, J. A., Rodriguez, A., Leon, S. A., Pingel, K., ... Rothi, L. J. G. (2006). A pilot study of use-dependent learning in the context of Constraint Induced Language Therapy. *Journal of the International Neuropsychological Society, 12*(6), 843–852. <https://doi.org/10.1017/S1355617706061029>

Raglio, A., Oasi, O., Gianotti, M., Rossi, A., Goulene, K., & Stramba-Badiale, M. (2016). Improvement of spontaneous language in stroke patients with chronic aphasia treated with music therapy: a randomized controlled trial. *International Journal of Neuroscience*, *126*(3), 235–242.  
<https://doi.org/10.3109/00207454.2015.1010647>

Wilssens, I., Vandenborre, D., van Dun, K., Verhoeven, J., Visch-Brink, E., & Mariëna, P. (2015). Constraint-induced aphasia therapy versus intensive semantic treatment in fluent aphasia. *American Journal of Speech-Language Pathology*, *24*(2), 281–294.  
[https://doi.org/10.1044/2015\\_AJSLP-14-0018](https://doi.org/10.1044/2015_AJSLP-14-0018)

### Supplementary Material 10: Funnel plots for meta-analyses using within group designs

These plots reflect relatively symmetric distribution of studies on both sides of the mean, suggesting limited impact of publication bias on the overall summary effect size (SES) results.

#### Funnel plot for Western Aphasia Battery-Aphasia within group meta-analysis

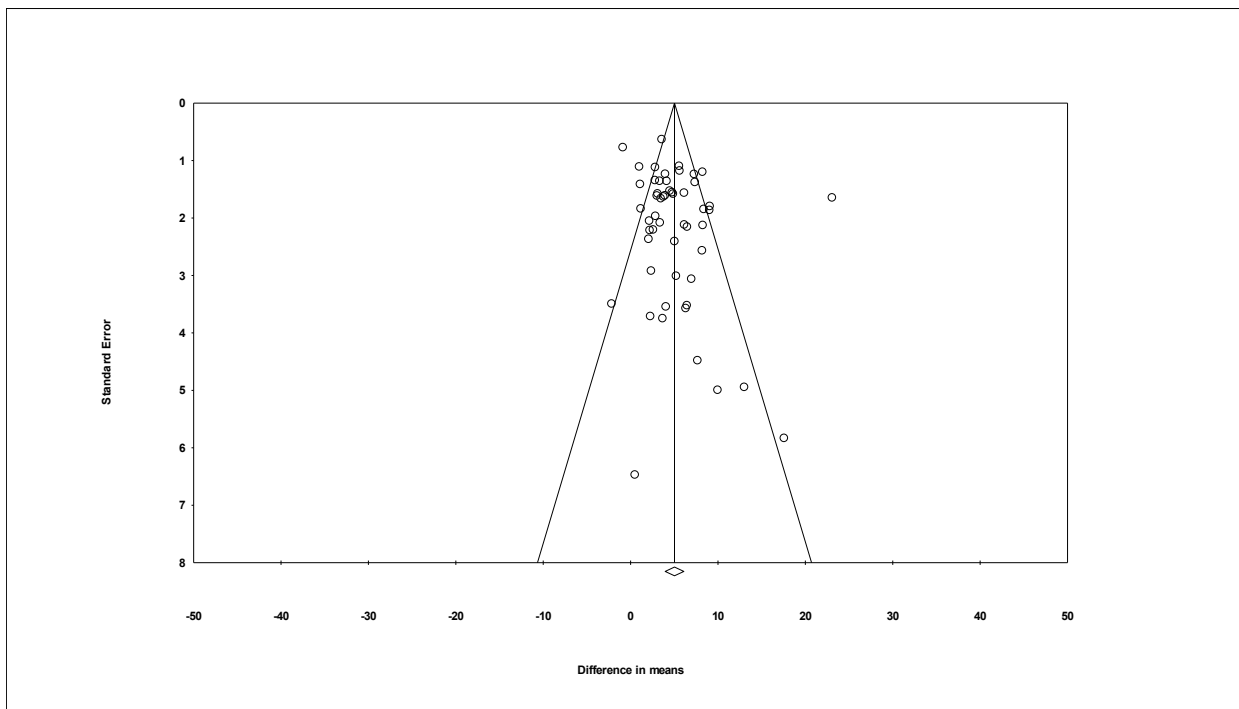

### Funnel plot for Communicative Effectiveness Index within group meta-analysis

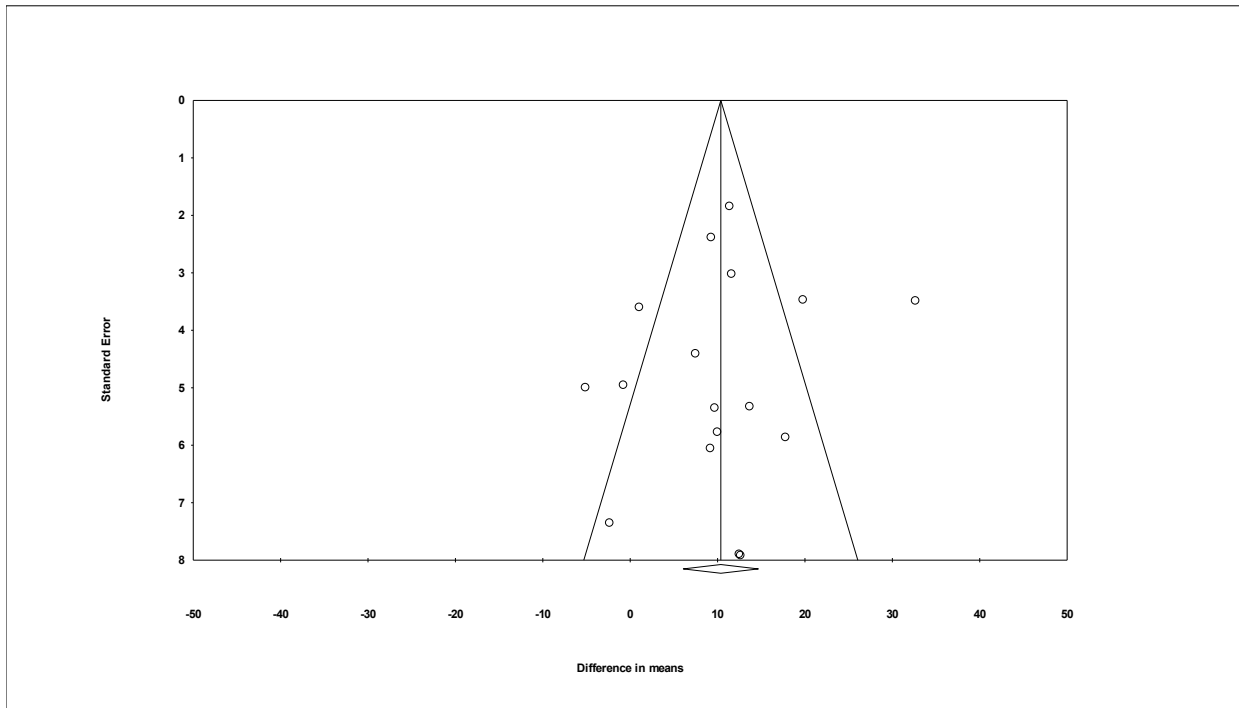

### Funnel plot for Boston Naming Test within group meta-analysis

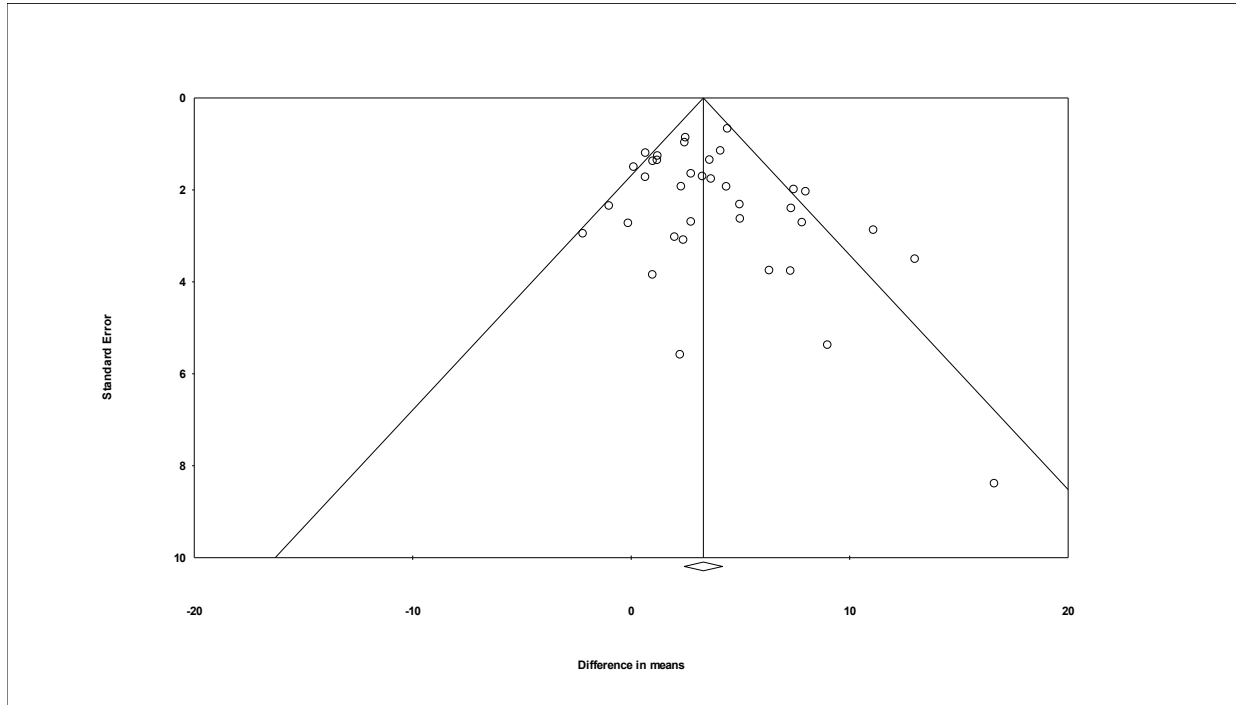

### **Supplementary Material 11: Forest plots for subgroup analyses using within group study designs**

Summary effect sizes for each subgroup and for all of the studies are provided. The difference in means column reflects the pre-treatment mean subtracted from the post-treatment mean. The lower and upper limits columns show the 95% confidence interval surrounding the difference in means. The final row describes the summary effect size, 95% CI, and p-value. The diamond represents the summary effect size. The squares reflect effect sizes of individual studies.

## Forest plot of Western Aphasia Battery –Aphasia Quotient subgroup analysis for dose frequency

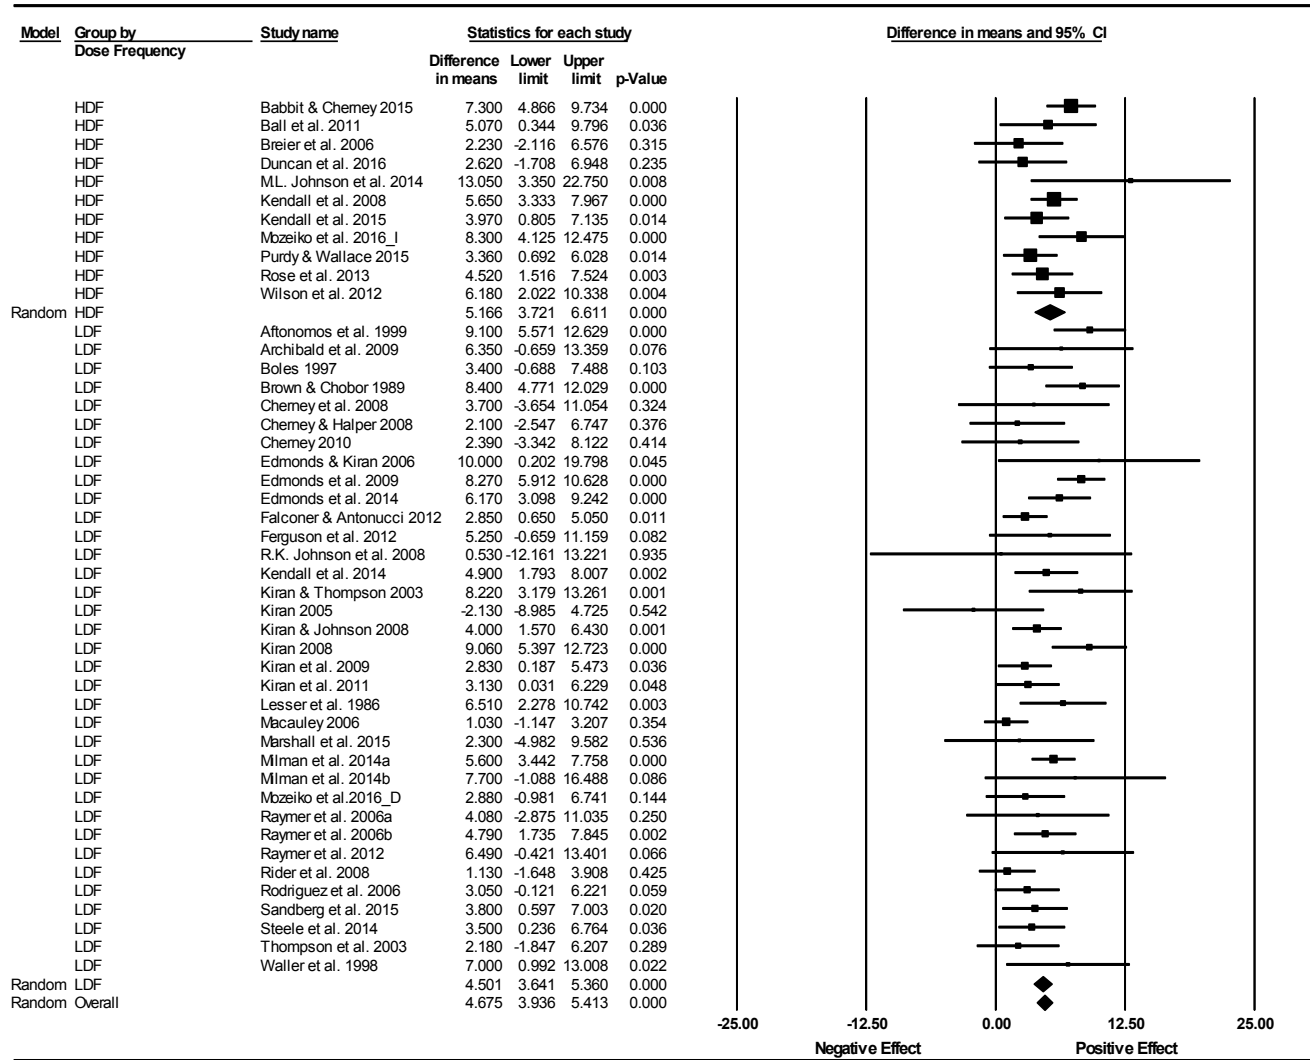

Note: LDF = lower dose frequency treatment schedule, HDF = higher dose frequency treatment schedule. There were no statistically significant differences between summary effect sizes for the lower dose frequency and higher dose frequency subgroups ( $Q = .601$ ,  $df = 1$ ,  $p > .05$ ).



## Forest plot of Western Aphasia Battery –Aphasia Quotient subgroup analysis for treatment type

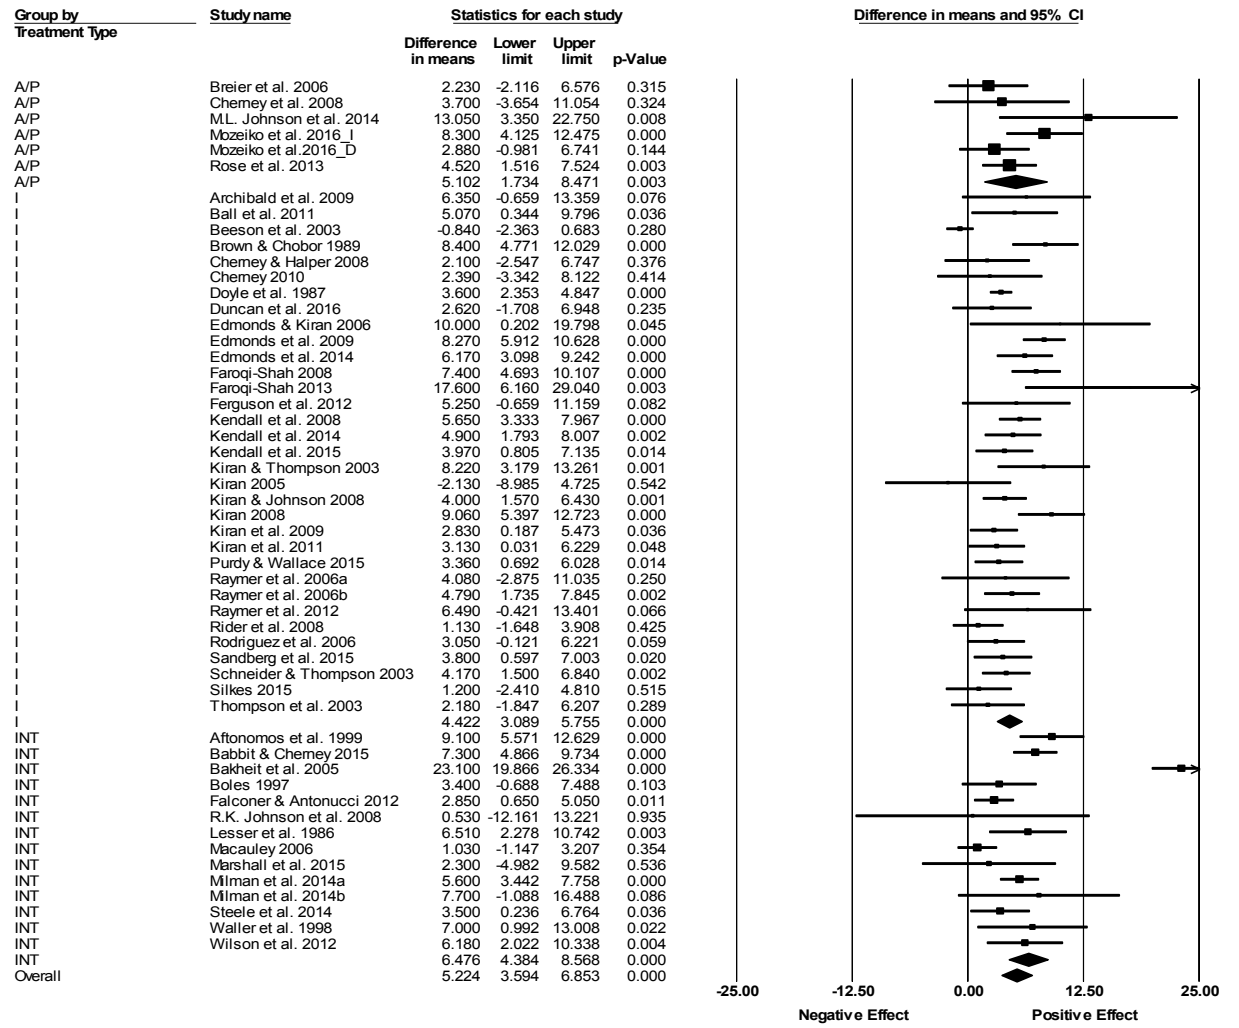

Note: I = impairment-based treatment, A/P = activity/participation treatment, INT= integrated treatment. There were no statistically significant differences between summary effect sizes for the different treatment types ( $Q= 2.64$ ,  $df= 2$ ,  $p > .05$ ).

## Forest plot of Communicative Effectiveness Index subgroup analysis for dose frequency

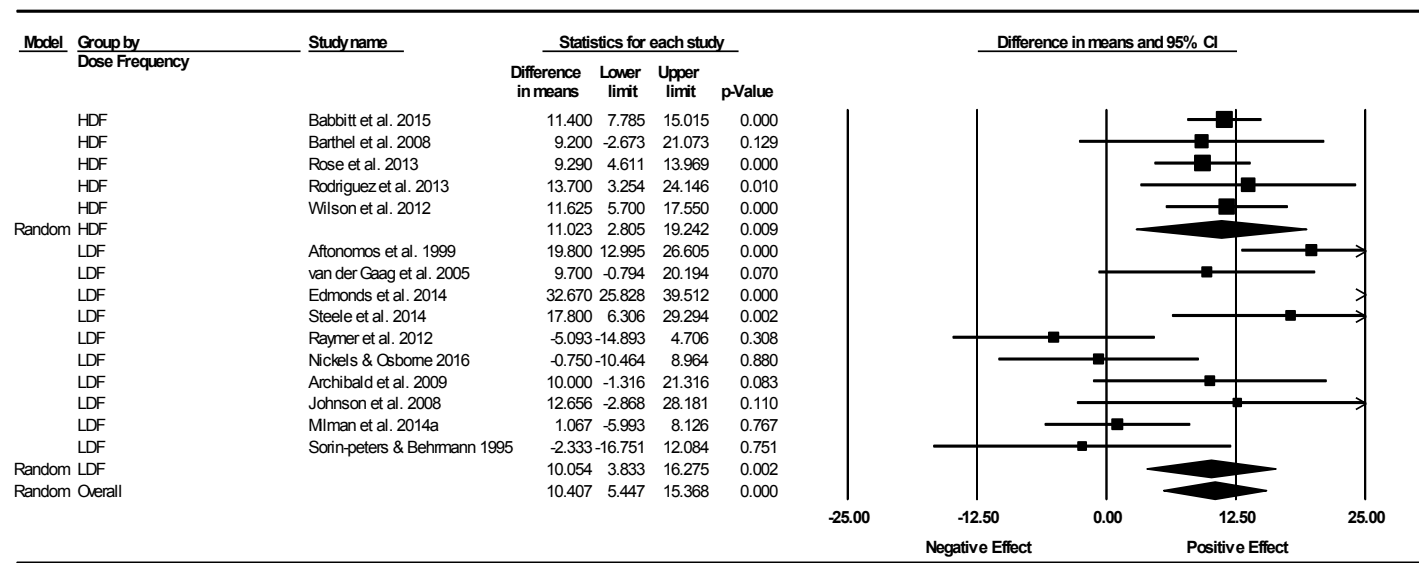

Note: LDF = lower dose frequency treatment schedule, HDF = higher dose frequency treatment schedule. There were no statistically significant differences between summary effect sizes for the lower dose frequency and higher dose frequency subgroups ( $Q = .034$ ,  $df = 1$ ,  $p > .05$ ).

## Forest plot of Boston Naming Test subgroup analysis for dose frequency

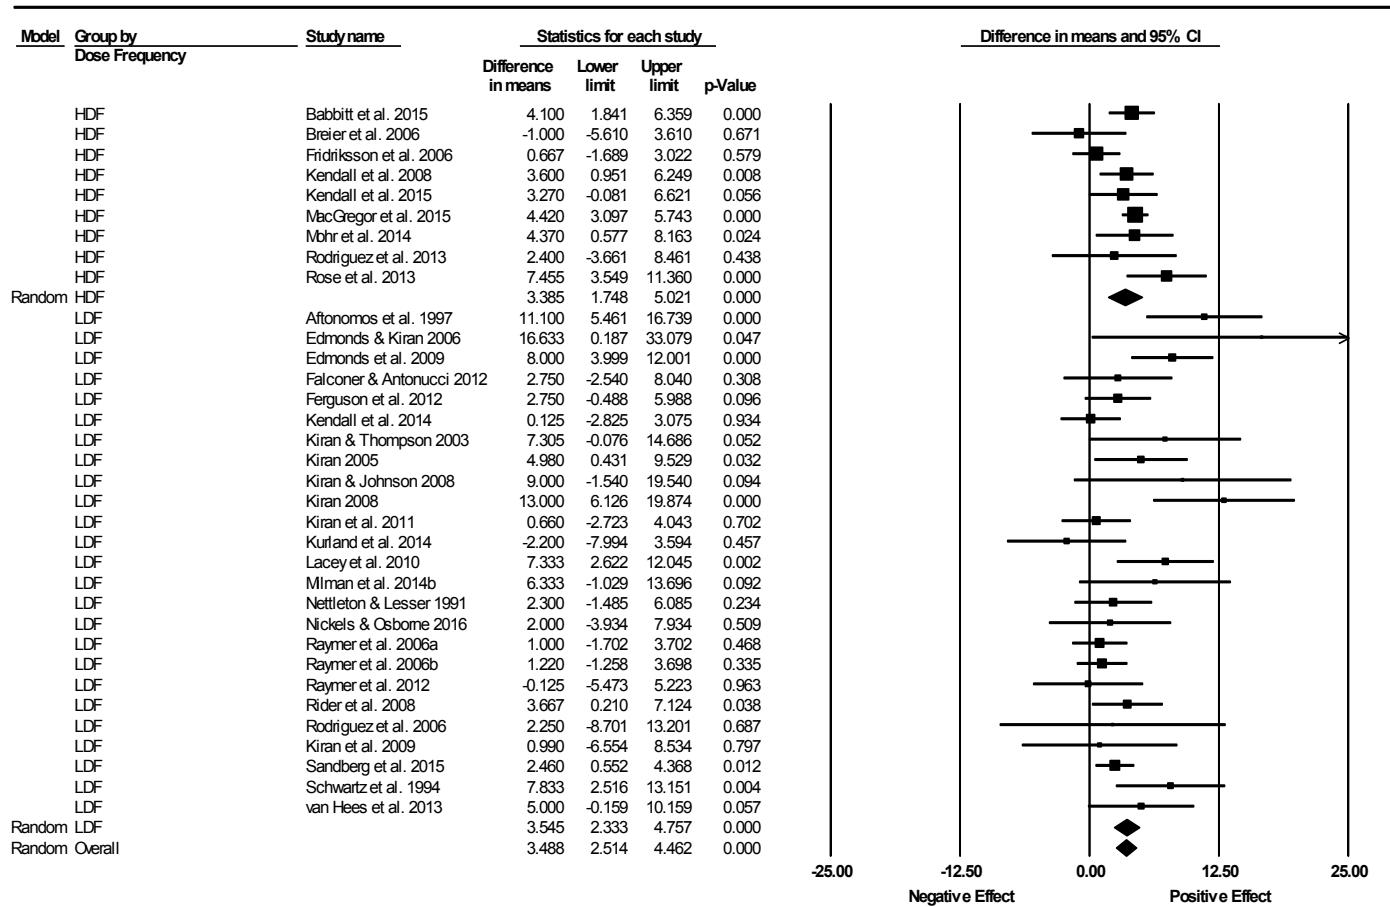

Note: LDF = lower dose frequency treatment schedule, HDF = higher dose frequency treatment schedule. There were no statistically significant differences between summary effect sizes for the lower dose frequency and higher dose frequency subgroups ( $Q = .024$ ,  $df = 1$ ,  $p > .05$ ).

# Forest plot of Boston Naming Test analysis for treatment type

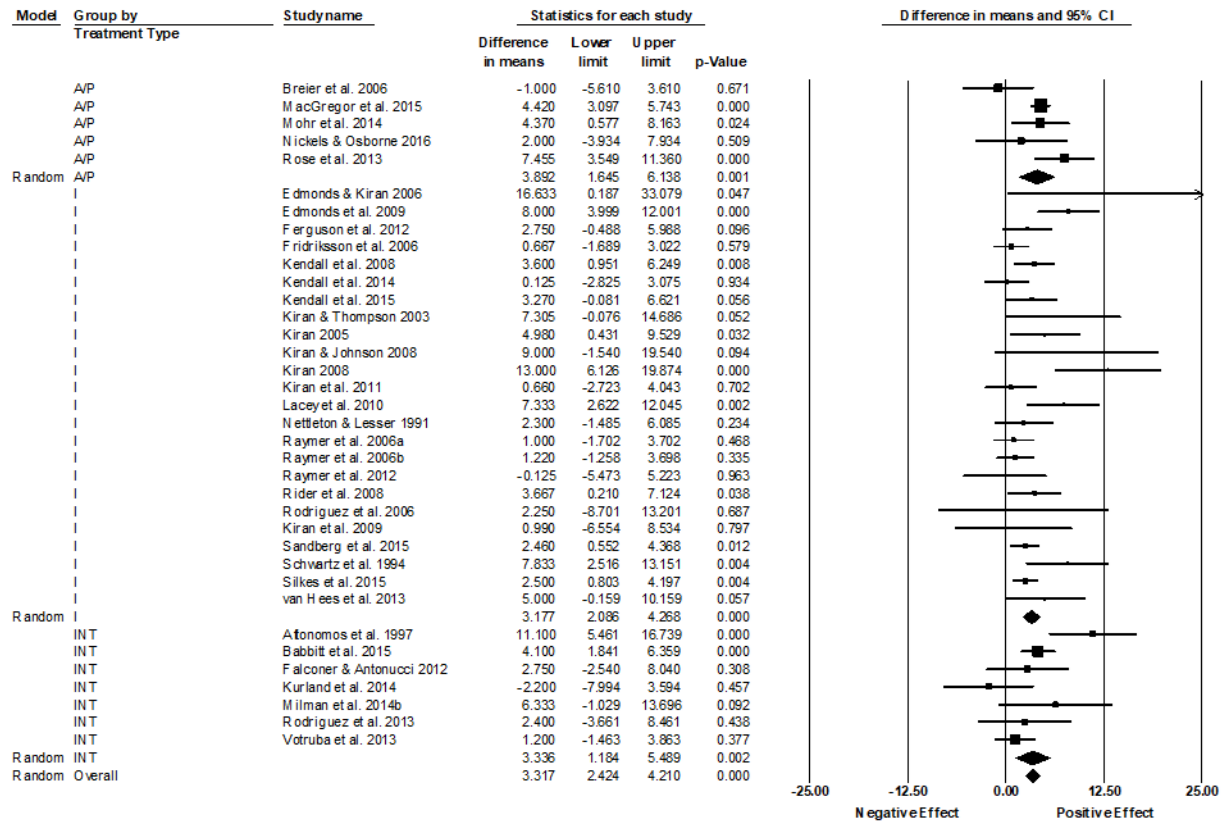

Note: I = impairment-based treatment, A/P = activity/participation treatment, INT = integrated treatment. There were no statistically significant differences between the summary effect sizes across different treatment types ( $Q=.32, df= 2, p> .05$ ).

**Supplementary Material 12: Summary of study quality ratings**

|               | Study Protocol | Blinding | Sampling | Treatment Fidelity | Statistics-primary | Statistics-standardized | Precision | I-T-T |
|---------------|----------------|----------|----------|--------------------|--------------------|-------------------------|-----------|-------|
| Within Group  | 96             | 10       | 99       | 47                 | 50                 | 40                      | 100       | N/A   |
| Between Group | 100            | 38       | 50       | 88                 | 100                | 100                     | 100       | 25    |

Note: Value reflects percentage of studies meeting criteria. Statistics-primary indicates that researchers tested for significance on the primary outcome measure; Statistics-standardized reflects that researchers tested for significance on the standardized outcome measure of interest (i.e., WAB, BNT, or CETI); Precision = provided adequate information to calculate an effect size; I-T-T = intention-to-treat analysis
